# Supplementary material for: Highly site-selective sequential alkenylation of oxalyl amide protected phenylpropylamine derivatives via a seven-membered palladacycle
Source: Royal Society of Chemistry journal article supplement (doi:10.1039/c4sc02172j), 2014-08-20

## Supporting information

### Highly Site Selectivity Sequential Alkenylation of Oxalyl Amide Protected Phenylpropylamine Derivatives via a Seven-Membered Palladacycle

Qian Wang,<sup>a</sup> Jian Han,<sup>a</sup> Chao Wang,<sup>a</sup> Jingyu Zhang,<sup>a</sup> Zhibin Huang,<sup>a</sup> Daqing Shi<sup>\*a</sup> and  
Yingsheng Zhao<sup>\*a</sup>

*College of Chemistry, Chemical Engineering and Materials Science, Soochow  
University, Suzhou 215123, P. R. China*

#### Table of Contents

|                                                          |     |
|----------------------------------------------------------|-----|
| 1. Reagents.....                                         | S2  |
| 2. Instruments.....                                      | S2  |
| 3. Preparation of oxalamide substrates.....              | S2  |
| 4. Screening of Solvents.....                            | S6  |
| 5. Removal of the Directing Group.....                   | S7  |
| 6. Synthesis of Palladacycle <b>7</b> and <b>9</b> ..... | S7  |
| 7. References.....                                       | S20 |
| Appendix (Proton and Carbon NMR Spectra).....            | S21 |

**1. Reagents:** Unless otherwise noted, all reagents were purchased from commercial suppliers and used without further purification. Column chromatography purifications were performed using 300–400 mesh silica gel.

**2. Instruments:** NMR spectra were recorded on Varian Inova–400 MHz, Inova–300 MHz, Bruker DRX–400 or Bruker DRX–500 instruments and calibrated using residual solvent peaks as internal reference. Multiplicities are recorded as: s = singlet, d = doublet, t = triplet, dd = doublet of doublets, br = broad singlet, m = multiplet. HRMS analyses were carried out using a Bruker micrOTOF–Q instrument or a TOF–MS instrument.

### 3. Preparation of oxalamide substrates

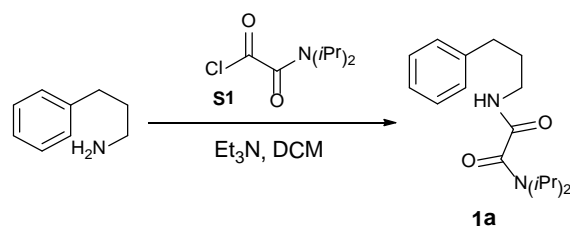

#### 3.1. Preparation of N, N–Diisopropylloxamoyl chloride **S1**<sup>[1]</sup>

A solution of Diisopropylamine (7.01 mL, 50 mmol, 1.0 equiv) in CH<sub>2</sub>Cl<sub>2</sub> (50 mL) was added dropwise to a solution of oxalyl chloride (6.44 mL, 75 mmol, 1.5 equiv) in CH<sub>2</sub>Cl<sub>2</sub> (100 mL) at 0 °C, after stirring for 15 min, triethylamine (7.30 mL, 52.5 mmol, 1.05 equiv) was added dropwise. The solution was warmed to room temperature and stirred for 6 hrs. The excess of oxalyl chloride and the solvent were removed under reduce pressure and CH<sub>2</sub>Cl<sub>2</sub> (30 mL) was added and evaporated. This operation was performed twice to give **S1** as a pale yellow solid. The crude product was used in the next step without any purification.

#### 3.2. General procedures for the preparation of oxalamide substrates **1n–1y** (except **1s**)<sup>[2]</sup>

A solution of amine (20 mmol, 1.0 eq) in CH<sub>2</sub>Cl<sub>2</sub> (40 mL) was added dropwise to a solution of N,N–Diisopropylloxamoyl chloride **S1** (25 mmol, 1.25 equiv) in CH<sub>2</sub>Cl<sub>2</sub> (50 mL) at 0 °C, after stirring for 5 min, triethylamine (2.92 mL, 21 mmol, 1.05 equiv) was added dropwise and then the mixture was stirred for 6 hours at room temperature before quenched by water (50 mL). The organic layer was separated and the aqueous layer was extracted with CH<sub>2</sub>Cl<sub>2</sub> (20 mL × 2). The combined organic phase was washed with brine (30 mL), and then dried over anhydrous Na<sub>2</sub>SO<sub>4</sub>. Evaporation and column chromatography on silica gel afforded corresponding amide substrates as white solid or colourless liquid with >90% yield.

#### 3.3. Preparation of **1s**<sup>[3]</sup>

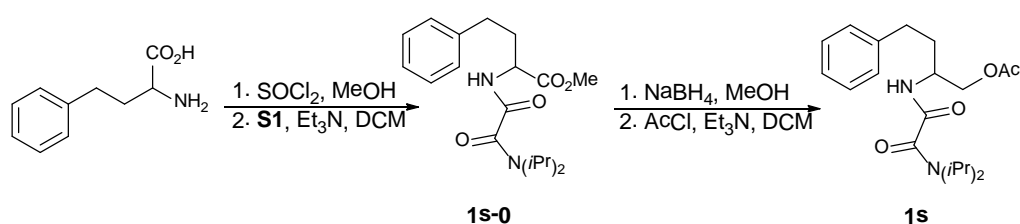

To a solution of 2–amino–4–phenylbutanoic acid (3.58 g, 20 mmol, 1.0 eq) in MeOH (30 mL), at

0 °C, was added SOCl<sub>2</sub> (4.35 mL, 60 mmol, 3.0 eq) dropwise. The resulting mixture was allowed to stir from 0 °C to room temperature overnight. The solvent was removed under reduced pressure afford a white solid, which was used directly for next step. The second step followed the general oxalamide coupling procedure, to give compound **1s-0** 3.90 g, 56%.

To a solution of **1s-0** (3.48 g, 10 mmol, 1.0 eq) in MeOH (10 ml) at room temperature, was added NaBH<sub>4</sub> (0.76 g, 20 mmol, 2.0 eq) in portions. Water was added after the reaction was determined by TLC, and the mixture was extracted with DCM. The combined organic layers was washed with water and brine, dried over anhydrous Na<sub>2</sub>SO<sub>4</sub>, the resulting solution was used directly for next step. The solution was treated with AcCl (0.78 mL, 11 mmol, 1.1 eq) and Et<sub>3</sub>N (2.78 mL, 20 mmol, 2.0 eq) at room temperature overnight. Water was added and the mixture was extracted with DCM. The combined organic layers was washed with water and brine, dried over anhydrous Na<sub>2</sub>SO<sub>4</sub>, and concentrated in vacuo. The resulting residue was purified by column chromatography on silica gel to give the product **1s** 3.15 g, 87%.

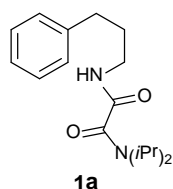

<sup>1</sup>H NMR (400 MHz, CDCl<sub>3</sub>) δ 7.32–7.28 (m, 2H), 7.22–7.19 (m, 3H), 7.12 (br, 1H), 4.79–4.73 (m, 1H), 3.55–3.50 (m, 1H), 3.36–3.31 (m, 2H), 2.71–2.67 (m, 2H), 1.94–1.87 (m, 2H), 1.44 (d, *J* = 6.8 Hz, 6H), 1.25 (d, *J* = 6.7 Hz, 6H); <sup>13</sup>C NMR (101 MHz, CDCl<sub>3</sub>) δ 163.36, 163.26, 141.32, 128.57, 128.49, 126.13, 49.77, 46.67, 39.03, 33.28, 30.92, 20.98, 20.19; HRMS Calcd for C<sub>17</sub>H<sub>25</sub>N<sub>2</sub>O<sub>2</sub> [M–H<sup>+</sup>]: 289.1916; Found: 289.1913.

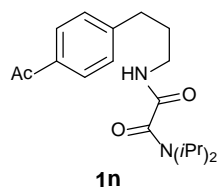

<sup>1</sup>H NMR (400 MHz, CDCl<sub>3</sub>) δ 7.84 (d, *J* = 8.2 Hz, 2H), 7.40 (br, 1H), 7.24 (d, *J* = 8.1 Hz, 2H), 4.63 (m, 1H), 3.48 (m, 1H), 3.29 (m, 2H), 2.72–2.67 (m, 2H), 2.54 (s, 3H), 1.91–1.84 (m, 2H), 1.38 (d, *J* = 6.8 Hz, 6H), 1.20 (d, *J* = 6.7 Hz, 6H); <sup>13</sup>C NMR (101 MHz, CDCl<sub>3</sub>) δ 197.87, 163.57, 163.54, 147.17, 135.26, 128.67, 128.64, 49.83, 46.49, 38.80, 33.18, 30.48, 26.60, 20.88, 20.12; HRMS Calcd for C<sub>19</sub>H<sub>29</sub>N<sub>2</sub>O<sub>3</sub> [M+H<sup>+</sup>]: 333.2178; Found: 333.2178.

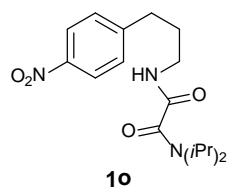

<sup>1</sup>H NMR (400 MHz, CDCl<sub>3</sub>) δ 8.14 (d, *J* = 8.6 Hz, 2H), 7.41 (br, 1H), 7.35 (d, *J* = 8.5 Hz, 2H), 4.72–4.63 (m, 1H), 3.52 (m, 1H), 3.33 (q, *J* = 6.7 Hz, 2H), 2.80–2.76 (m, 2H), 1.96–1.89 (m, 2H), 1.42 (d, *J* = 6.8 Hz, 6H), 1.24 (d, *J* = 6.7 Hz, 6H); <sup>13</sup>C NMR (101 MHz, CDCl<sub>3</sub>) δ 163.57, 149.26,

146.58, 129.29, 123.83, 49.88, 46.63, 38.74, 33.10, 30.47, 20.92, 20.15; HRMS Calcd for C<sub>17</sub>H<sub>26</sub>N<sub>3</sub>O<sub>4</sub> [M+H<sup>+</sup>]: 336.1923; Found: 336.1917.

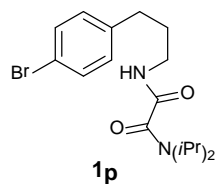

<sup>1</sup>H NMR (400 MHz, CDCl<sub>3</sub>) δ 7.39 (br, 1H), 7.36 (d, *J* = 8.2 Hz, 2H), 7.03 (d, *J* = 8.1 Hz, 2H), 4.65–4.62 (m, 1H), 3.50–3.47 (m, 1H), 3.29–3.24 (m, 2H), 2.59 (t, *J* = 7.6 Hz, 2H), 1.87–1.81 (m, 2H), 1.39 (d, *J* = 6.7 Hz, 6H), 1.21 (d, *J* = 6.6 Hz, 6H); <sup>13</sup>C NMR (101 MHz, CDCl<sub>3</sub>) δ 163.51, 140.30, 131.53, 130.20, 119.78, 49.83, 46.53, 38.80, 32.61, 30.70, 20.92, 20.16; HRMS Calcd for C<sub>17</sub>H<sub>24</sub>BrN<sub>2</sub>O<sub>2</sub> [M–H<sup>+</sup>]: 367.1021; Found: 367.1028.

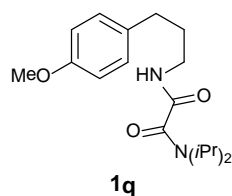

<sup>1</sup>H NMR (400 MHz, CDCl<sub>3</sub>) δ 7.09 (d, *J* = 8.6 Hz, 2H), 6.95 (br, 1H), 6.82 (d, *J* = 8.6 Hz, 2H), 4.81–4.74 (m, 1H), 3.78 (s, 3H), 3.53–3.48 (m, 1H), 3.32–3.27 (m, 2H), 2.63 – 2.59 (m, 2H), 1.88 – 1.81 (m, 2H), 1.42 (d, *J* = 6.8 Hz, 6H), 1.23 (d, *J* = 6.7 Hz, 6H); <sup>13</sup>C NMR (101 MHz, CDCl<sub>3</sub>) δ 163.17, 162.96, 157.90, 133.22, 129.28, 113.88, 55.27, 49.60, 46.59, 38.88, 32.24, 31.04, 20.88, 20.08; HRMS Calcd for C<sub>18</sub>H<sub>27</sub>N<sub>2</sub>O<sub>3</sub> [M–H<sup>+</sup>]: 319.2022; Found: 319.2045.

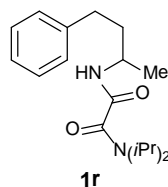

<sup>1</sup>H NMR (400 MHz, CDCl<sub>3</sub>) δ 7.29 (s, 1H), 7.25 (s, 1H), 7.22 – 7.14 (m, 4H), 7.04 (s, 1H), 4.73 (dt, *J* = 13.3, 6.6 Hz, 1H), 4.01 (dt, *J* = 14.5, 7.1 Hz, 1H), 3.51 (dt, *J* = 13.6, 6.8 Hz, 1H), 2.66 (m, 2H), 1.91–1.70 (m, 2H), 1.43 (dd, *J* = 6.8, 1.5 Hz, 6H), 1.23 (t, *J* = 7.0 Hz, 9H). <sup>13</sup>C NMR (101 MHz, CDCl<sub>3</sub>) δ 163.49, 162.77, 141.67, 128.50, 128.43, 126.00, 49.77, 46.59, 45.30, 38.48, 32.57, 21.00, 20.93, 20.74, 20.24, 20.18.

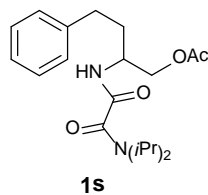

<sup>1</sup>H NMR (400 MHz, CDCl<sub>3</sub>) δ 7.23 (d, *J* = 7.5 Hz, 2H), 7.15 (t, *J* = 8.6 Hz, 3H), 4.69–4.62 (m, 1H), 4.19–4.15 (m, 1H), 4.12–4.08 (m, 2H), 3.53–3.47 (m, 1H), 2.73–2.58 (m, 2H), 2.03 (s, 3H), 1.88–1.82 (m, 2H), 1.42–1.40 (m, 6H), 1.23–1.20 (m, 6H); <sup>13</sup>C NMR (101 MHz, CDCl<sub>3</sub>) δ 170.88,

163.27, 141.02, 128.51, 128.38, 126.12, 65.69, 49.86, 48.06, 46.52, 33.08, 32.20, 20.87, 20.19, 20.11; HRMS Calcd for C<sub>20</sub>H<sub>29</sub>N<sub>2</sub>O<sub>4</sub> [M-H<sup>+</sup>]: 361.2127; Found: 361.2142.

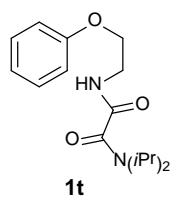

<sup>1</sup>H NMR (400 MHz, CDCl<sub>3</sub>) δ 7.37 (br, 1H), 7.31–7.26 (m, 2H), 6.96 (t, *J* = 7.4 Hz, 1H), 6.91–6.88 (m, 2H), 4.76–4.69 (m, 1H), 4.07 (t, *J* = 5.2 Hz, 2H), 3.72–3.68 (m, 2H), 3.55–3.48 (m, 1H), 1.42 (d, *J* = 6.8 Hz, 6H), 1.22 (d, *J* = 6.7 Hz, 6H); <sup>13</sup>C NMR (101 MHz, CDCl<sub>3</sub>) δ 163.45, 162.84, 158.45, 129.64, 121.28, 114.55, 66.19, 49.76, 46.69, 38.93, 20.96, 20.16; HRMS Calcd for C<sub>17</sub>H<sub>25</sub>N<sub>2</sub>O<sub>2</sub> [M-H<sup>+</sup>]: 291.1709; Found: 291.1731.

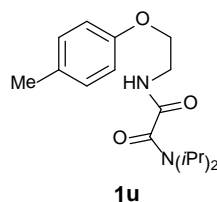

<sup>1</sup>H NMR (400 MHz, CDCl<sub>3</sub>) δ 7.37 (br, 1H), 7.06 (d, *J* = 8.5 Hz, 2H), 6.78 (d, *J* = 8.5 Hz, 2H), 4.71–4.67 (m, 1H), 4.06–4.02 (m, 2H), 3.71–3.65 (m, 2H), 3.53–3.47 (m, 1H), 2.27 (s, 3H), 1.41 (d, *J* = 6.8 Hz, 6H), 1.21 (d, *J* = 6.6 Hz, 6H); <sup>13</sup>C NMR (101 MHz, CDCl<sub>3</sub>) δ 163.46, 162.93, 156.32, 130.47, 130.03, 114.39, 66.32, 49.77, 46.63, 38.93, 20.94, 20.57, 20.15; HRMS Calcd for C<sub>17</sub>H<sub>25</sub>N<sub>2</sub>O<sub>3</sub> [M-H<sup>+</sup>]: 305.1865; Found: 305.1882.

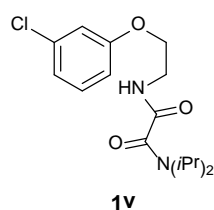

<sup>1</sup>H NMR (400 MHz, CDCl<sub>3</sub>) δ 7.51 (br, 1H), 7.17 (t, *J* = 8.1 Hz, 1H), 6.92 (d, *J* = 7.9 Hz, 1H), 6.86 (s, 1H), 6.76 (d, *J* = 8.1 Hz, 1H), 4.69–4.62 (m, 1H), 4.03 (t, *J* = 5.2 Hz, 2H), 3.69–3.65 (m, 2H), 3.52–3.45 (m, 1H), 1.39 (d, *J* = 6.8 Hz, 6H), 1.20 (d, *J* = 6.7 Hz, 6H); <sup>13</sup>C NMR (101 MHz, CDCl<sub>3</sub>) δ 163.51, 162.94, 159.17, 134.94, 130.36, 121.37, 115.01, 112.95, 66.47, 49.81, 46.62, 38.72, 20.90, 20.11; HRMS Calcd for C<sub>16</sub>H<sub>22</sub>ClN<sub>2</sub>O<sub>3</sub> [M-H<sup>+</sup>]: 325.1319; Found: 325.1345.

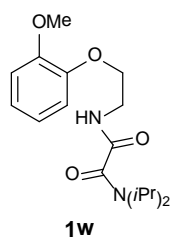

$^1\text{H}$  NMR (400 MHz,  $\text{CDCl}_3$ )  $\delta$  7.48 (br, 1H), 6.96–6.88 (m, 4H), 4.66–4.61 (m, 1H), 4.13–4.10 (m, 2H), 3.86 (s, 3H), 3.69–3.68 (m, 2H), 3.51–3.46 (m, 1H), 1.42 (d,  $J = 6.6$  Hz, 6H), 1.21 (d,  $J = 6.4$  Hz, 6H);  $^{13}\text{C}$  NMR (101 MHz,  $\text{CDCl}_3$ )  $\delta$  163.62, 163.01, 150.07, 147.80, 122.50, 121.03, 115.48, 111.99, 68.63, 55.86, 49.77, 46.55, 38.94, 20.94, 20.13; HRMS Calcd for  $\text{C}_{17}\text{H}_{27}\text{N}_2\text{O}_4$  [ $\text{M}+\text{H}^+$ ]: 323.1971; Found: 323.1972.

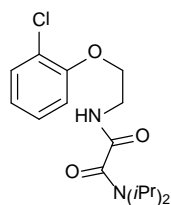

**1x**

$^1\text{H}$  NMR (400 MHz,  $\text{CDCl}_3$ )  $\delta$  7.35 (dd,  $J = 8.2, 1.6$  Hz, 1H), 7.30 (br, 1H), 7.22–7.18 (m, 1H), 6.93–6.89 (m, 2H), 4.69–4.66 (m, 1H), 4.13 (t,  $J = 5.2$  Hz, 2H), 3.77–3.73 (m, 2H), 3.52–3.49 (m, 1H), 1.42 (d,  $J = 6.8$  Hz, 6H), 1.22 (d,  $J = 6.7$  Hz, 6H);  $^{13}\text{C}$  NMR (101 MHz,  $\text{CDCl}_3$ )  $\delta$  163.63, 162.87, 154.07, 130.51, 127.92, 123.35, 122.22, 114.04, 67.80, 49.81, 46.69, 38.81, 20.98, 20.17; HRMS Calcd for  $\text{C}_{16}\text{H}_{22}\text{ClN}_2\text{O}_3$  [ $\text{M}-\text{H}^+$ ]: 325.1319; Found: 325.1346.

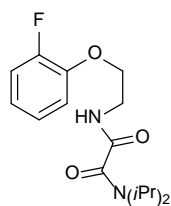

**1y**

$^1\text{H}$  NMR (400 MHz,  $\text{CDCl}_3$ )  $\delta$  7.32 (br, 1H), 7.11 – 7.01 (m, 2H), 7.09–7.02 (m, 2H), 4.68–4.64 (m, 1H), 4.14 (t,  $J = 5.2$  Hz, 2H), 3.74–3.70 (m, 2H), 3.54–3.47 (m, 1H), 1.41 (d,  $J = 6.8$  Hz, 6H), 1.22 (d,  $J = 6.7$  Hz, 6H);  $^{13}\text{C}$  NMR (101 MHz,  $\text{CDCl}_3$ )  $\delta$  163.66, 162.91, 154.14, 151.70, 146.60, 146.50, 124.52, 124.48, 122.01, 121.94, 116.58, 116.40, 115.56, 68.04, 49.85, 46.67, 38.89, 20.95, 20.16; HRMS Calcd for  $\text{C}_{16}\text{H}_{22}\text{FN}_2\text{O}_3$  [ $\text{M}-\text{H}^+$ ]: 309.1614; Found: 309.1639.

#### 4. Screening of Solvents

**Table S1.** Screening of Solvents

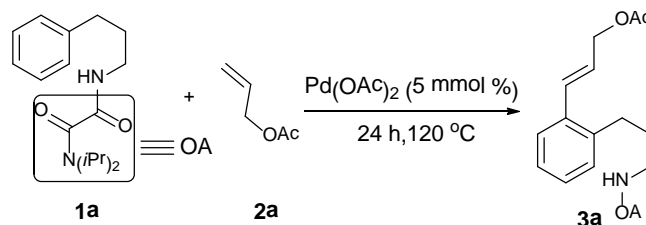

| Entry | solvent                | Yield <sup>[a]</sup> |
|-------|------------------------|----------------------|
| 1     | dioxane                | 54                   |
| 2     | HFIP                   | 38                   |
| 3     | PhCl                   | 67                   |
| 4     | $\text{CH}_3\text{CN}$ | 63                   |

|           |                   |    |
|-----------|-------------------|----|
| <b>5</b>  | Toluene           | 66 |
| <b>6</b>  | H <sub>2</sub> O  | 47 |
| <b>7</b>  | THF               | 78 |
| <b>8</b>  | <i>t</i> -Amyl-OH | 77 |
| <b>9</b>  | DMF               | 55 |
| <b>10</b> | DCE               | 84 |

[a] Reactions were carried out on a 0.2 mmol scale; yield was based on LC using acetophenone as the internal standard.

### 5. Removal of the Directing Group<sup>[3]</sup>

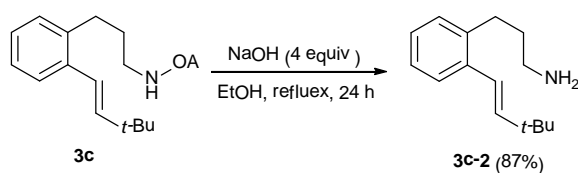

Compound **3c** (74.4 mg, 0.2 mmol) was dissolved in a mixture of EtOH (1 mL), NaOH (32 mg, 0.8 mmol, 4 eq) was then added. The mixture was heated to 80 °C and stirred for 12 hours. Water was added and the mixture was extracted with DCM. The combined organic layers was washed with water and brine, dried over anhydrous Na<sub>2</sub>SO<sub>4</sub>, and concentrated in vacuo. The residue was purified by column chromatography on silica gel to give the desired product **3c-2** with 37.8 mg, 87 % yield.

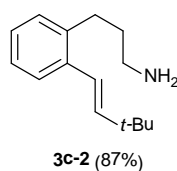

<sup>1</sup>H NMR (400 MHz, CDCl<sub>3</sub>) δ 7.40 (d, *J* = 6.9 Hz, 1H), 7.16 – 7.12 (m, 3H), 6.50 (d, *J* = 16.0 Hz, 1H), 6.10 (d, *J* = 15.9 Hz, 1H), 3.99 (br, 2H), 2.84 (t, *J* = 7.3 Hz, 2H), 2.79 – 2.68 (m, 2H), 1.98 – 1.77 (m, 2H), 1.12 (s, 9H). <sup>13</sup>C NMR (101 MHz, CDCl<sub>3</sub>) δ 144.22, 137.99, 137.04, 129.45, 127.07, 126.63, 126.29, 122.03, 40.73, 33.76, 31.50, 30.38, 29.78.

### 6. Synthesis of Palladacycle **7** and **9**

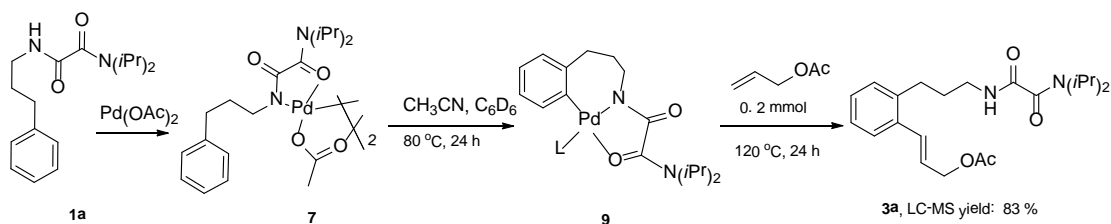

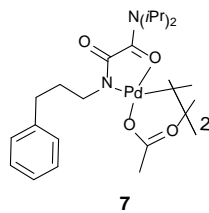

Pd(OAc)<sub>2</sub> (0.112 g, 0.5 mmol) and **1a** (0.145 g, 0.5 mmol) were added to toluene (2 mL). The reaction was stirred in a sealed tube at 40 °C for 12 h, and then the solvent was removed in vacuum. To the crude product, toluene (3 mL) was added, and then the purified product was collected by filtration, washed with hexane (0.5 mL). <sup>1</sup>H NMR (400 MHz, CDCl<sub>3</sub>) δ 7.25 – 7.11 (m, 5H), 6.47 (s, 1H), 3.62 (s, 1H), 3.05 (s, 1H), 2.59 (d, *J* = 5.6 Hz, 2H), 2.08 – 2.04(m, 1H), 1.91 – 1.85 (m, 5H), 1.32 – 1.19 (m, 12H).

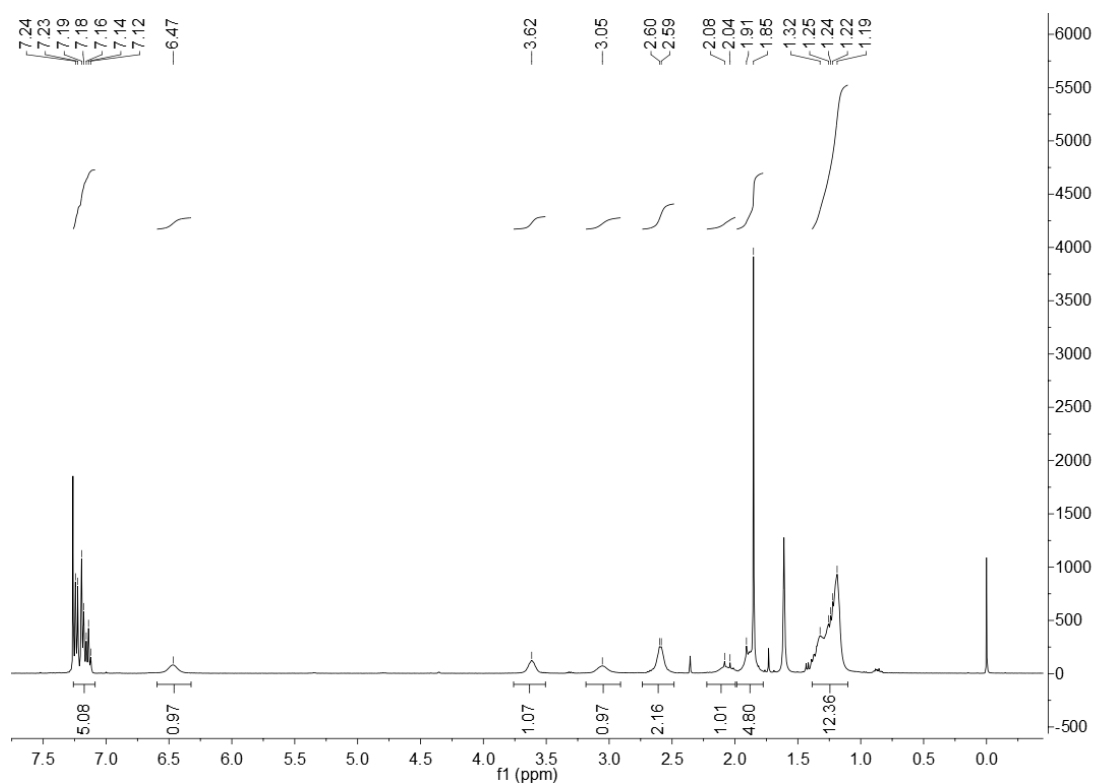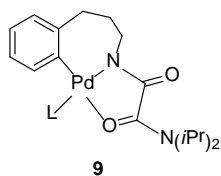

A mixture of **7** (22.7 mg, 0.05 mmol), acetonitrile(4.1 mg, 0.1 mmol, 2 equiv) and Benzene-*d*<sub>6</sub> (0.5 mL) in NMR tube was heated at 80 °C for 24 hrs respectively. The reaction mixture was cooled to rt and <sup>1</sup>H NMR was tested. From the <sup>1</sup>H NMR spectra of reaction, we can conclude that C–H activation can take place. The result showed the palladium intermediate **9** might be formed during the catalytic cycle. <sup>1</sup>H NMR (400 MHz, C<sub>6</sub>D<sub>6</sub>) δ 7.16 – 7.12 (m, 2H), 7.06 – 6.99 (m, 1H), 4.83 (dt, *J* = 13.3, 6.6 Hz, 1H), 3.17 (dd, *J* = 12.7, 5.8 Hz, 2H), 3.08 (dt, *J* = 13.6, 6.8 Hz, 1H), 2.48 – 2.36 (m, 1H), 1.65 (dd, *J* = 14.9, 7.2 Hz, 2H), 1.39 (d, *J* = 6.8 Hz, 6H), 0.94 (d, *J* = 6.7 Hz,



6H).

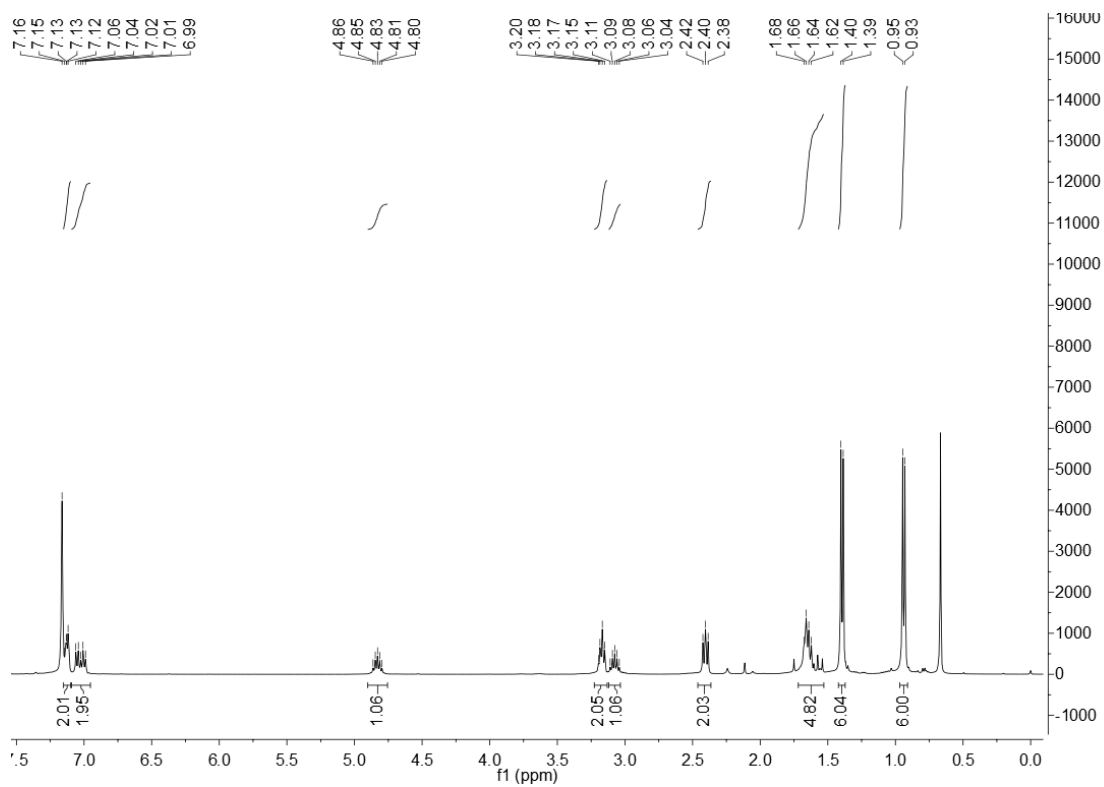

**2a** (0.2 mmol, 2 equiv) was added in the NMR tube contained the mixture mentioned above, the mixture was heated at 120 °C for 12 hrs respectively. **3a** was obtained in 83 % yield based on LC-MS using acetophenone as the internal standard.

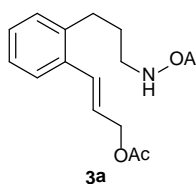

$^1\text{H}$  NMR (400 MHz,  $\text{CDCl}_3$ )  $\delta$  7.44 (d,  $J = 6.5$  Hz, 1H), 7.28-7.13 (m, 4H), 6.91 (d,  $J = 15.6$  Hz, 1H), 6.15 (dt,  $J = 15.4, 6.4$  Hz, 1H), 4.75 (d,  $J = 6.3$  Hz, 2H), 4.70-4.60 (m, 1H), 3.51 (dt,  $J = 13.4, 6.7$  Hz, 1H), 3.32 (dd,  $J = 13.1, 6.6$  Hz, 2H), 2.77-2.70 (m, 2H), 2.10 (s, 3H), 1.86-1.76 (m, 2H), 1.42 (d,  $J = 6.8$  Hz, 6H), 1.23 (d,  $J = 6.6$  Hz, 6H).  $^{13}\text{C}$  NMR (101 MHz,  $\text{CDCl}_3$ )  $\delta$  171.07, 163.55, 163.22, 139.05, 135.12, 131.98, 129.66, 128.30, 126.71, 126.51, 125.28, 65.47, 49.76, 46.65, 39.02, 30.66, 30.58, 21.18, 21.00, 20.20. HRMS Calcd for  $\text{C}_{22}\text{H}_{32}\text{N}_2\text{O}_4$  [ $\text{M}+\text{Na}^+$ ]: 411.2260; Found: 411.2262.

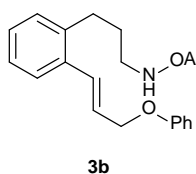

$^1\text{H}$  NMR (400 MHz,  $\text{CDCl}_3$ )  $\delta$  7.56-7.46 (m, 1H), 7.36-7.30 (m, 2H), 7.24 - 7.19 (m, 3H), 7.01-6.95 (m, 4H), 6.87 (br, 4H), 6.33 (dt,  $J = 15.8, 5.6$  Hz, 1H), 4.85-4.72 (m, 3H), 3.53 (dt,  $J = 13.7, 6.8$  Hz, 1H), 3.28 (dd,  $J = 13.4, 7.0$  Hz, 2H), 2.79-2.67 (m, 2H), 1.78 (dt,  $J = 14.8, 7.4$  Hz, 2H), 1.44 (d,  $J = 6.8$  Hz, 6H), 1.25 (d,  $J = 6.7$  Hz, 6H).  $^{13}\text{C}$  NMR (101 MHz,  $\text{CDCl}_3$ )  $\delta$  163.38, 163.08, 158.66, 138.89, 135.35, 130.34, 129.68, 129.63, 129.54, 128.11, 126.72, 126.57, 126.47, 121.03, 115.04, 68.64, 49.73, 46.71, 39.05, 30.71, 30.56, 21.01, 20.20. HRMS Calcd for  $\text{C}_{26}\text{H}_{34}\text{N}_2\text{O}_3$  [ $\text{M}+\text{Na}^+$ ]: 445.2467; Found: 411.2472.

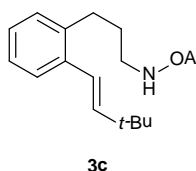

$^1\text{H}$  NMR (400 MHz,  $\text{CDCl}_3$ )  $\delta$  7.44-7.36 (m, 1H), 7.21-7.07 (m, 3H), 6.93 (br, 1H), 6.51 (d,  $J = 15.9$  Hz, 1H), 6.11 (d,  $J = 15.9$  Hz, 1H), 4.81 (dt,  $J = 13.3, 6.7$  Hz, 1H), 3.52 (dt,  $J = 13.6, 6.8$  Hz, 1H), 3.31 (dd,  $J = 13.4, 6.8$  Hz, 2H), 2.80-2.67 (m, 2H), 1.90-1.78 (m, 2H), 1.42 (d,  $J = 6.8$  Hz, 6H), 1.23 (d,  $J = 6.7$  Hz, 6H), 1.13 (s, 9H).  $^{13}\text{C}$  NMR (101 MHz,  $\text{CDCl}_3$ )  $\delta$  207.13, 163.26, 162.98, 144.14, 138.29, 137.05, 129.46, 127.05, 126.59, 126.26, 122.06, 49.68, 46.73, 39.18, 33.75, 31.07, 30.25, 29.78, 21.02, 20.20. HRMS Calcd for  $\text{C}_{23}\text{H}_{36}\text{N}_2\text{O}_2$  [ $\text{M}+\text{Na}^+$ ]: 395.2674; Found: 411.2684.

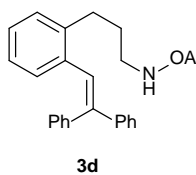

$^1\text{H}$  NMR (400 MHz,  $\text{CDCl}_3$ )  $\delta$  7.35 – 7.28 (m, 5H), 7.22 – 7.05 (m, 7H), 7.00 (s, 1H), 6.96 (br, 1H), 6.86 (m, 2H), 4.76 (dt,  $J = 13.4, 6.7$  Hz, 1H), 3.55 – 3.45 (m, 1H), 3.34 – 3.29 (m, 2H), 2.75 – 2.71 (m, 2H), 1.92 – 1.85 (m, 1H), 1.42 (t,  $J = 6.5$  Hz, 6H), 1.21 (t,  $J = 4.6$  Hz, 6H).

$^{13}\text{C}$  NMR (101 MHz,  $\text{CDCl}_3$ )  $\delta$  163.28, 163.08, 143.82, 143.58, 141.31, 140.18, 140.00, 136.62, 130.83, 130.53, 129.04, 128.60, 128.50, 128.36, 128.28, 128.24, 127.73, 127.32, 127.16, 126.63, 126.16, 125.78, 49.70, 46.69, 39.28, 33.29, 31.12, 30.00, 20.99, 20.20, 14.33. HRMS Calcd for  $\text{C}_{31}\text{H}_{36}\text{N}_2\text{O}_2$  [ $\text{M}+\text{Na}^+$ ]: 491.2674; Found: 411.2677.

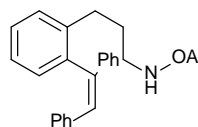

3e

$^1\text{H}$  NMR (400 MHz,  $\text{CDCl}_3$ )  $\delta$  7.33 – 7.27 (m, 6H), 7.25 – 7.09 (m, 6H), 7.07 (s, 1H), 6.94 (dd,  $J = 7.4, 2.0$  Hz, 1.6H), 6.55 (br, 1H), 4.65 (dt,  $J = 13.3, 6.7$  Hz, 1H), 3.49 (dt,  $J = 13.6, 6.8$  Hz, 1H), 3.10 – 2.97 (m, 2H), 2.51 – 2.34 (m, 2H), 1.58 – 1.48 (m, 2H), 1.41 (t,  $J = 7.1$  Hz, 6H), 1.19 (t,  $J = 7.5$  Hz, 6H).  $^{13}\text{C}$  NMR (101 MHz,  $\text{CDCl}_3$ )  $\delta$  163.18, 163.07, 142.84, 141.38, 139.64, 139.43, 137.21, 130.92, 130.02, 129.91, 129.57, 129.37, 128.83, 128.59, 128.43, 128.27, 128.18, 128.16, 127.69, 127.18, 126.92, 126.81, 49.66, 46.64, 39.26, 30.61, 29.60, 20.97, 20.20. HRMS Calcd for  $\text{C}_{31}\text{H}_{36}\text{N}_2\text{O}_2$  [ $\text{M}+\text{Na}^+$ ]: 491.2674; Found: 411.2677.

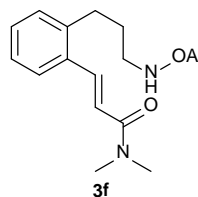

3f

$^1\text{H}$  NMR (400 MHz,  $\text{CDCl}_3$ )  $\delta$  7.95 (d,  $J = 15.2$  Hz, 1H), 7.60 – 7.46 (m, 1H), 7.29 (dd,  $J = 7.4, 1.3$  Hz, 1H), 7.25 – 7.18 (m, 2H), 7.08 (br, 1H), 6.79 (d,  $J = 15.2$  Hz, 1H), 4.68 (dt,  $J = 13.3, 6.7$  Hz, 1H), 3.51 (dt,  $J = 13.6, 6.7$  Hz, 1H), 3.30 (dd,  $J = 13.3, 6.9$  Hz, 2H), 3.18 (s, 3H), 3.07 (s, 3H), 2.82 (dd,  $J = 13.7, 5.8$  Hz, 2H), 1.87 (d,  $J = 7.5$  Hz, 1H), 1.82 (d,  $J = 7.3$  Hz, 1H), 1.43 (d,  $J = 6.8$  Hz, 6H), 1.23 (d,  $J = 6.7$  Hz, 6H).  $^{13}\text{C}$  NMR (101 MHz,  $\text{CDCl}_3$ )  $\delta$  166.83, 163.70, 163.36, 140.77, 140.02, 134.24, 130.15, 129.65, 126.75, 126.61, 119.44, 49.81, 46.57, 38.95, 37.56, 36.05, 30.75, 30.72, 20.99, 20.21. HRMS Calcd for  $\text{C}_{22}\text{H}_{33}\text{N}_3\text{O}_3$  [ $\text{M}+\text{Na}^+$ ]: 410.2420; Found: 410.2424.

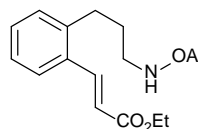

3g

$^1\text{H}$  NMR (400 MHz,  $\text{CDCl}_3$ )  $\delta$  7.97 (d,  $J = 15.8$  Hz, 1H), 7.56 (d,  $J = 7.8$  Hz, 1H), 7.33 – 7.29 (m, 1H), 7.22 (dd,  $J = 11.2, 7.5$  Hz, 2H), 7.02 (br, 1H), 6.36 (d,  $J = 15.8$  Hz, 1H), 4.76 (dt,  $J = 13.3, 6.6$  Hz, 1H), 4.27 (q,  $J = 7.1$  Hz, 2H), 3.51 (dt,  $J = 13.6, 6.8$  Hz, 1H), 3.32 (dd,  $J = 13.5, 6.9$  Hz, 2H), 2.94 – 2.71 (m, 2H), 1.84 (dt,  $J = 14.9, 7.5$  Hz, 2H), 1.42 (d,  $J = 6.8$  Hz, 6H), 1.35 (t,  $J = 7.1$  Hz, 3H), 1.23 (d,  $J = 6.7$  Hz, 6H).  $^{13}\text{C}$  NMR (101 MHz,  $\text{CDCl}_3$ )  $\delta$  167.06, 163.42, 163.09, 141.84,

140.85, 133.12, 130.26, 130.13, 126.91, 126.87, 120.00, 60.68, 49.74, 46.67, 38.97, 31.05, 30.83, 30.66, 20.98, 20.18, 14.45. HRMS Calcd for C<sub>22</sub>H<sub>32</sub>N<sub>2</sub>O<sub>4</sub> [M+Na<sup>+</sup>]: 411.2274; Found: 411.2267.

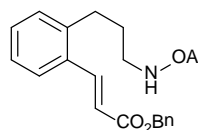

3h

<sup>1</sup>H NMR (400 MHz, CDCl<sub>3</sub>) δ 8.02 (d, *J* = 15.8 Hz, 1H), 7.55 (d, *J* = 7.6 Hz, 1H), 7.43 – 7.29 (m, 6H), 7.24 – 7.20 (m, 2H), 6.99 (br, 1H), 6.41 (dd, *J* = 15.7, 11.3 Hz, 1H), 5.26 (s, 2H), 4.76 (dt, *J* = 13.3, 6.6 Hz, 1H), 3.64 – 3.42 (m, 1H), 3.31 (dd, *J* = 13.5, 6.8 Hz, 2H), 2.84 – 2.80 (m, 2H), 1.84 (dt, *J* = 14.8, 7.4 Hz, 2H), 1.42 (d, *J* = 6.8 Hz, 6H), 1.23 (d, *J* = 6.7 Hz, 5H). <sup>13</sup>C NMR (101 MHz, CDCl<sub>3</sub>) δ 166.88, 163.39, 163.02, 142.47, 140.95, 136.19, 132.99, 130.42, 130.18, 128.74, 128.41, 126.96, 126.90, 119.54, 66.53, 49.73, 46.71, 38.98, 31.06, 30.68, 21.00, 20.19. HRMS Calcd for C<sub>27</sub>H<sub>34</sub>N<sub>2</sub>O<sub>4</sub> [M+Na<sup>+</sup>]: 473.2416; Found: 473.2419.

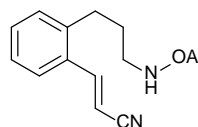

3i

<sup>1</sup>H NMR (400 MHz, CDCl<sub>3</sub>) δ 7.72 (d, *J* = 16.5 Hz, 1H), 7.49 (d, *J* = 7.8 Hz, 1H), 7.38 (dd, *J* = 7.4, 6.6 Hz, 1H), 7.29 – 7.18 (m, 2H), 7.09 (br, 1H), 5.84 (d, *J* = 16.5 Hz, 1H), 4.80 (dt, *J* = 13.3, 6.7 Hz, 1H), 3.55 (dt, *J* = 13.6, 6.8 Hz, 1H), 3.35 (dd, *J* = 13.5, 6.8 Hz, 2H), 2.89 – 2.69 (m, 2H), 1.86 (dd, *J* = 15.0, 7.5 Hz, 2H), 1.45 (d, *J* = 6.8 Hz, 6H), 1.26 (d, *J* = 6.7 Hz, 6H). <sup>13</sup>C NMR (101 MHz, CDCl<sub>3</sub>) δ 163.43, 162.95, 148.02, 140.56, 132.24, 131.29, 130.36, 127.17, 126.10, 118.32, 98.00, 49.77, 46.76, 38.91, 30.93, 30.53, 21.01, 20.19. HRMS Calcd for C<sub>20</sub>H<sub>27</sub>N<sub>3</sub>O<sub>2</sub> [M+Na<sup>+</sup>]: 324.2001; Found: 324.2007.

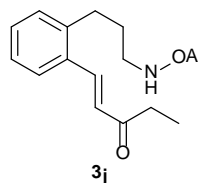

3j

<sup>1</sup>H NMR (400 MHz, CDCl<sub>3</sub>) δ 7.87 (d, *J* = 15.9 Hz, 1H), 7.58 (d, *J* = 7.8 Hz, 1H), 7.32 (m, 1H), 7.26 – 7.19 (m, 2H), 7.01 (br, 1H), 6.68 (d, *J* = 15.9 Hz, 1H), 4.84 – 4.67 (m, 1H), 3.52 (dt, *J* = 13.6, 6.8 Hz, 1H), 3.32 (dd, *J* = 13.4, 6.9 Hz, 2H), 2.88 – 2.78 (m, 2H), 2.71 (q, *J* = 7.3 Hz, 2H), 1.84 (dt, *J* = 14.8, 7.5 Hz, 2H), 1.43 (d, *J* = 6.8 Hz, 6H), 1.23 (d, *J* = 6.7 Hz, 6H), 1.18 (t, *J* = 7.3 Hz, 3H). <sup>13</sup>C NMR (101 MHz, CDCl<sub>3</sub>) δ 201.02, 163.45, 163.04, 141.22, 139.29, 133.24, 130.40, 130.20, 127.59, 126.96, 126.82, 49.77, 46.72, 39.00, 34.59, 30.98, 30.72, 21.00, 20.19, 8.31. HRMS Calcd for C<sub>22</sub>H<sub>32</sub>N<sub>2</sub>O<sub>3</sub> [M+Na<sup>+</sup>]: 395.2311; Found: 395.2314.

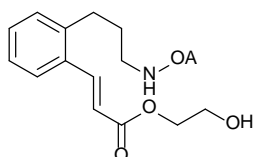

3k

$^1\text{H}$  NMR (400 MHz,  $\text{CDCl}_3$ )  $\delta$  8.01 (d,  $J = 15.8$  Hz, 1H), 7.73 – 7.46 (m, 1H), 7.31 (m, 1H), 7.22 (m, 3H), 6.39 (d,  $J = 15.8$  Hz, 1H), 4.64 (dt,  $J = 13.3, 6.7$  Hz, 1H), 4.43 – 4.29 (m, 2H), 4.01 – 3.84 (m, 2H), 3.51 (dt,  $J = 13.6, 6.8$  Hz, 1H), 3.34 (dd,  $J = 13.4, 6.9$  Hz, 2H), 2.97 (s, 1H), 2.85 – 2.74 (m, 2H), 1.83 (dt,  $J = 14.9, 7.4$  Hz, 2H), 1.42 (d,  $J = 6.8$  Hz, 6H), 1.23 (d,  $J = 6.7$  Hz, 6H).  $^{13}\text{C}$  NMR (101 MHz,  $\text{CDCl}_3$ )  $\delta$  167.21, 163.71, 163.41, 142.49, 141.09, 132.90, 130.45, 130.18, 126.96, 126.85, 119.40, 66.42, 61.22, 49.95, 46.63, 39.08, 31.09, 30.82, 20.94, 20.16. HRMS Calcd for  $\text{C}_{22}\text{H}_{32}\text{N}_2\text{O}_5$  [ $\text{M}+\text{Na}^+$ ]: 427.2209; Found: 427.2209.

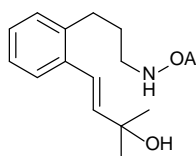

3l

$^1\text{H}$  NMR (400 MHz,  $\text{CDCl}_3$ )  $\delta$  7.50 – 7.35 (m, 1H), 7.26 – 7.09 (m, 4H), 6.93 (d,  $J = 15.8$  Hz, 1H), 6.24 (d,  $J = 15.8$  Hz, 1H), 4.70 (m, 1H), 3.53 (dt,  $J = 13.6, 6.8$  Hz, 1H), 3.29 (q,  $J = 6.5$  Hz, 2H), 3.21 (br, 1H), 2.81 – 2.70 (m, 2H), 1.90 – 1.78 (m, 2H), 1.48 – 1.39 (m, 12H), 1.24 (d,  $J = 6.7$  Hz, 6H).  $^{13}\text{C}$  NMR (101 MHz,  $\text{CDCl}_3$ )  $\delta$  163.57, 163.37, 140.57, 138.91, 136.28, 129.52, 127.48, 126.53, 126.45, 123.56, 71.02, 49.92, 46.71, 38.69, 30.71, 30.14, 30.12, 20.93, 20.20. HRMS Calcd for  $\text{C}_{22}\text{H}_{34}\text{N}_2\text{O}_3$  [ $\text{M}+\text{Na}^+$ ]: 397.2467; Found: 397.2477.

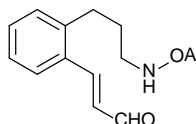

3m

$^1\text{H}$  NMR (400 MHz,  $\text{CDCl}_3$ )  $\delta$  9.76 (d,  $J = 7.7$  Hz, 1H), 7.81 (d,  $J = 15.7$  Hz, 1H), 7.61 (d,  $J = 7.8$  Hz, 1H), 7.39 – 7.35 (m, 1H), 7.30 – 7.25 (m, 2H), 7.13 (br, 1H), 6.68 (dd,  $J = 15.7, 7.7$  Hz, 1H), 4.75 (dt,  $J = 13.3, 6.7$  Hz, 1H), 3.61 – 3.46 (m, 1H), 3.35 (dd,  $J = 13.3, 6.8$  Hz, 2H), 2.94 – 2.80 (m, 2H), 1.95 – 1.80 (m, 2H), 1.43 (d,  $J = 6.8$  Hz, 6H), 1.24 (d,  $J = 6.7$  Hz, 6H).  $^{13}\text{C}$  NMR (101 MHz,  $\text{CDCl}_3$ )  $\delta$  194.14, 163.50, 163.02, 149.69, 141.28, 132.50, 131.30, 130.34, 130.24, 127.21, 127.15, 49.80, 46.76, 38.95, 31.21, 30.52, 21.00, 20.18. HRMS Calcd for  $\text{C}_{20}\text{H}_{28}\text{N}_2\text{O}_3$  [ $\text{M}+\text{Na}^+$ ]: 344.2100; Found: 344.2109.

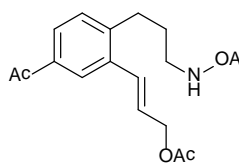

3n

$^1\text{H}$  NMR (400 MHz,  $\text{CDCl}_3$ )  $\delta$  8.02 (d,  $J = 1.6$  Hz, 1H), 7.79 (m, 1H), 7.27 (dd,  $J = 16.7$ , 8.1 Hz, 1H), 7.08 (br, 1H), 6.92 (d,  $J = 15.7$  Hz, 1H), 6.25 (dt,  $J = 15.7$ , 6.4 Hz, 1H), 4.87 – 4.57 (m, 3H), 3.53 (m, 1H), 3.38 – 3.26 (m, 2H), 2.83 – 2.73 (m, 2H), 2.59 (s, 3H), 2.12 (s, 2H), 1.88 – 1.77 (m, 2H), 1.42 (d,  $J = 6.8$  Hz, 6H), 1.23 (d,  $J = 6.7$  Hz, 6H).  $^{13}\text{C}$  NMR (101 MHz,  $\text{CDCl}_3$ )  $\delta$  197.88, 171.05, 163.60, 163.12, 144.55, 135.80, 135.70, 131.64, 130.97, 129.91, 128.11, 126.93, 126.57, 65.18, 49.79, 46.69, 38.93, 30.76, 30.24, 29.68, 21.17, 21.00, 20.19. HRMS Calcd for  $\text{C}_{24}\text{H}_{34}\text{N}_2\text{O}_5$  [ $\text{M}+\text{Na}^+$ ]: 453.2365; Found: 453.2373.

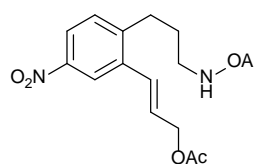

3o

$^1\text{H}$  NMR (400 MHz,  $\text{CDCl}_3$ )  $\delta$  8.29 (d,  $J = 2.4$  Hz, 1H), 8.08 – 7.99 (m, 1H), 7.38 – 7.31 (m, 2H), 7.11 (br, 1H), 6.91 (d,  $J = 15.7$  Hz, 1H), 6.30 (dt,  $J = 15.7$ , 6.2 Hz, 1H), 4.81 – 4.73 (m, 3H), 3.52 (dt,  $J = 13.6$ , 6.8 Hz, 1H), 3.35 (dd,  $J = 13.2$ , 6.8 Hz, 2H), 2.81 (dd,  $J = 8.9$ , 6.9 Hz, 2H), 2.13 (s, 3H), 1.88 – 1.78 (m, 2H), 1.43 (d,  $J = 6.8$  Hz, 6H), 1.24 (d,  $J = 6.7$  Hz, 6H).  $^{13}\text{C}$  NMR (101 MHz,  $\text{CDCl}_3$ )  $\delta$  171.02, 163.68, 163.03, 146.97, 146.46, 136.76, 130.55, 129.67, 128.57, 122.76, 121.58, 100.12, 64.85, 49.82, 46.73, 38.82, 30.73, 30.21, 29.85, 21.16, 21.01, 20.19. HRMS Calcd for  $\text{C}_{22}\text{H}_{31}\text{N}_3\text{O}_6$  [ $\text{M}+\text{Na}^+$ ]: 456.2111; Found: 456.2121.

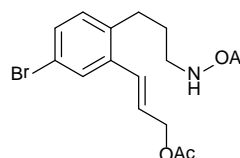

3p

$^1\text{H}$  NMR (400 MHz,  $\text{CDCl}_3$ )  $\delta$  7.58 (d,  $J = 2.0$  Hz, 1H), 7.35 (m, 2H), 7.06 (m, 2H), 6.85 (d,  $J = 15.7$  Hz, 1H), 6.17 (dt,  $J = 15.6$ , 6.4 Hz, 1H), 4.81 – 4.73 (m, 3H), 3.54 (dt,  $J = 13.6$ , 6.8 Hz, 1H), 3.41 – 3.24 (m, 2H), 2.79 – 2.65 (m, 2H), 2.13 (s, 3H), 1.80 (dt,  $J = 14.6$ , 7.1 Hz, 2H), 1.44 (d,  $J = 6.8$  Hz, 6H), 1.25 (d,  $J = 6.7$  Hz, 6H).  $^{13}\text{C}$  NMR (101 MHz,  $\text{CDCl}_3$ )  $\delta$  170.87, 163.44, 163.02, 137.85, 137.10, 131.15, 130.91, 130.39, 129.23, 126.62, 120.28, 64.97, 49.65, 46.55, 38.75, 30.94, 30.28, 30.03, 21.01, 20.87, 20.06. HRMS Calcd for  $\text{C}_{22}\text{H}_{31}\text{BrN}_2\text{O}_4$  [ $\text{M}+\text{Na}^+$ ]: 489.1365; Found: 489.1373.

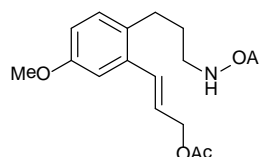

3q

$^1\text{H}$  NMR (400 MHz,  $\text{CDCl}_3$ )  $\delta$  7.07 – 6.97 (m, 3H), 6.87 (d,  $J = 15.7$  Hz, 1H), 6.77 (dd,  $J = 8.4$ , 2.7 Hz, 1H), 6.15 (dt,  $J = 15.6$ , 6.5 Hz, 1H), 4.76 – 4.72 (m, 3H), 3.80 (s, 3H), 3.51 (dt,  $J = 13.6$ , 6.8 Hz, 1H), 3.30 (dd,  $J = 13.3$ , 6.9 Hz, 2H), 2.69 – 2.65 (m, 2H), 2.11 (s, 3H), 1.78 (dt,  $J = 14.7$ , 7.3 Hz, 2H), 1.42 (d,  $J = 6.8$  Hz, 6H), 1.23 (d,  $J = 6.7$  Hz, 6H).  $^{13}\text{C}$  NMR (101 MHz,  $\text{CDCl}_3$ )  $\delta$

171.06, 163.52, 163.23, 158.29, 136.05, 131.95, 131.44, 130.72, 126.80, 125.37, 114.07, 111.56, 65.38, 61.49, 55.44, 49.76, 46.66, 38.98, 30.83, 29.85, 21.18, 21.01, 20.20. HRMS Calcd for  $C_{23}H_{34}N_2O_5$   $[M+Na]^+$ : 441.2365; Found: 441.2368.

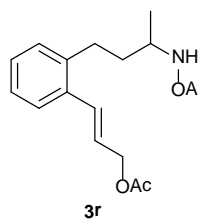

$^1H$  NMR (400 MHz,  $CDCl_3$ )  $\delta$  7.44 – 7.41 (m, 1H), 7.21 – 7.13 (m, 3H), 6.96 – 6.92 (m, 2H), 6.17 – 6.10 (m, 1H), 4.86 – 4.80 (m, 1H), 4.75 – 4.66 (m, 2H), 4.08 – 4.01 (m, 1H), 3.55 – 3.48 (m, 1H), 2.81 – 2.64 (m, 2H), 2.09 (s, 3H), 1.76 – 1.68 (m, 2H), 1.44 (dd,  $J = 6.8, 1.9$  Hz, 6H), 1.27 – 1.21 (m, 6H).  $^{13}C$  NMR (101 MHz,  $CDCl_3$ )  $\delta$  171.04, 163.46, 163.09, 139.50, 135.03, 132.26, 129.61, 128.29, 126.61, 126.43, 125.14, 65.56, 49.81, 46.60, 45.43, 38.35, 30.19, 21.21, 21.03, 20.99, 20.91, 20.24. HRMS Calcd for  $C_{23}H_{34}N_2O_4$   $[M+Na]^+$ : 425.2416; Found: 425.2420.

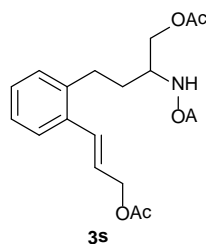

$^1H$  NMR (400 MHz,  $CDCl_3$ )  $\delta$  7.43 – 7.41 (m, 1H), 7.21 – 7.13 (m, 4H), 6.95 (d,  $J = 15.6$  Hz, 1H), 6.15 – 6.08 (m, 1H), 4.90 – 4.85 (m, 1H), 4.70 – 4.59 (m, 2H), 4.27 – 4.20 (m, 1H), 4.15 – 4.12 (m, 2H), 3.58 – 3.49 (m, 1H), 2.88 – 2.65 (m, 2H), 2.09 (s, 3H), 2.06 (s, 3H), 1.82 – 1.76 (m, 1H), 1.70 – 1.67 (m, 1H), 1.44 (dd,  $J = 6.8, 2.9$  Hz, 6H), 1.25 (dd,  $J = 9.4, 6.7$  Hz, 6H).  $^{13}C$  NMR (101 MHz,  $CDCl_3$ )  $\delta$  171.13, 170.91, 163.79, 163.33, 139.03, 135.08, 132.40, 129.66, 128.35, 126.81, 126.52, 125.32, 65.85, 65.69, 49.92, 48.29, 46.54, 33.09, 29.95, 21.22, 20.98, 20.95, 20.90, 20.26, 20.16. HRMS Calcd for  $C_{25}H_{36}N_2O_6$   $[M+Na]^+$ : 483.2471; Found: 483.2476.

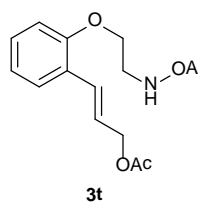

$^1H$  NMR (400 MHz,  $CDCl_3$ )  $\delta$  7.45 (dd,  $J = 7.7, 1.4$  Hz, 1H), 7.35 (br, 1H), 7.24 – 7.20 (m, 1H), 7.00 – 6.93 (m, 1H), 6.85 (d,  $J = 8.2$  Hz, 1H), 6.31 (dt,  $J = 16.0, 6.6$  Hz, 1H), 4.78 – 4.71 (m, 1H), 4.13 (t,  $J = 5.3$  Hz, 2H), 3.74 (dd,  $J = 11.1, 5.5$  Hz, 2H), 3.52 (dt,  $J = 13.6, 6.8$  Hz, 1H), 2.10 (s, 3H), 1.42 (d,  $J = 6.8$  Hz, 6H), 1.22 (d,  $J = 6.7$  Hz, 6H).  $^{13}C$  NMR (101 MHz,  $CDCl_3$ )  $\delta$  171.09, 163.53, 162.70, 155.75, 129.31, 129.17, 127.31, 125.68, 124.17, 121.45, 112.28, 67.00, 65.76, 49.75, 46.73, 39.01, 21.18, 20.97, 20.17. HRMS Calcd for  $C_{21}H_{30}N_2O_5$   $[M+Na]^+$ : 413.2052; Found: 413.2052.

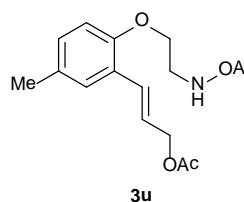

$^1\text{H}$  NMR (400 MHz,  $\text{CDCl}_3$ )  $\delta$  7.32 (br, 1H), 7.36 – 7.25(m, 1H), 7.02 (dd,  $J = 8.3, 1.8$  Hz, 1H), 6.95 (d,  $J = 16.0$  Hz, 1H), 6.75 (d,  $J = 8.3$  Hz, 1H), 6.29 (dt,  $J = 16.0, 6.6$  Hz, 1H), 4.78 – 4.72 (m, 3H), 4.08 (t,  $J = 5.2$  Hz, 2H), 3.72 (dd,  $J = 11.1, 5.5$  Hz, 2H), 3.52 (dt,  $J = 13.6, 6.8$  Hz, 1H), 2.28 (s, 3H), 2.10 (s, 3H), 1.42 (d,  $J = 6.8$  Hz, 6H), 1.22 (d,  $J = 6.7$  Hz, 6H).  $^{13}\text{C}$  NMR (101 MHz,  $\text{CDCl}_3$ )  $\delta$  171.11, 163.51, 162.72, 153.75, 130.70, 129.76, 129.25, 127.82, 125.40, 123.92, 112.50, 67.25, 65.81, 49.75, 46.73, 39.06, 21.18, 20.98, 20.65, 20.17. HRMS Calcd for  $\text{C}_{22}\text{H}_{32}\text{N}_2\text{O}_5$   $[\text{M}+\text{Na}^+]$ : 427.2209; Found: 427.2209.

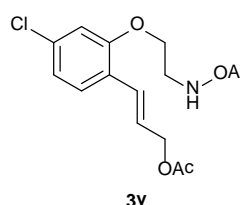

$^1\text{H}$  NMR (400 MHz,  $\text{CDCl}_3$ )  $\delta$  7.42 (s, 1H), 7.35 (d,  $J = 8.3$  Hz, 1H), 6.91 – 6.83 (m, 3H), 6.28 (dt,  $J = 16.0, 6.6$  Hz, 1H), 4.78 – 4.72 (m, 3H), 4.09 (t,  $J = 5.3$  Hz, 2H), 3.74 (dd,  $J = 11.1, 5.5$  Hz, 2H), 3.52 (dt,  $J = 13.6, 6.8$  Hz, 1H), 2.10 (s, 3H), 1.42 (d,  $J = 6.8$  Hz, 6H), 1.23 (d,  $J = 6.7$  Hz, 6H).  $^{13}\text{C}$  NMR (101 MHz,  $\text{CDCl}_3$ )  $\delta$  171.05, 163.53, 162.67, 156.16, 134.46, 128.11, 128.04, 124.65, 124.26, 121.52, 112.82, 67.25, 65.56, 49.77, 46.74, 38.84, 21.13, 20.95, 20.14. HRMS Calcd for  $\text{C}_{21}\text{H}_{29}\text{ClN}_2\text{O}_5$   $[\text{M}+\text{Na}^+]$ : 447.1663; Found: 447.1662.

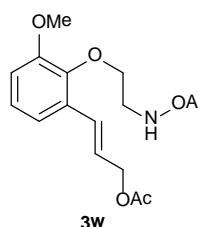

$^1\text{H}$  NMR (400 MHz,  $\text{CDCl}_3$ )  $\delta$  7.79 (s, 1H), 7.10 – 6.95 (m, 3H), 6.85 (dd,  $J = 7.9, 1.6$  Hz, 1H), 6.30 (dt,  $J = 16.0, 6.5$  Hz, 1H), 4.76 (dd,  $J = 6.5, 1.2$  Hz, 2H), 4.74 – 4.65 (m, 1H), 4.08 – 4.03 (m, 2H), 3.90 (s, 3H), 3.62 (dd,  $J = 10.1, 5.2$  Hz, 2H), 3.56 – 3.49 (m, 1H), 2.10 (s, 3H), 1.45 (d,  $J = 6.8$  Hz, 6H), 1.24 (d,  $J = 6.7$  Hz, 6H).  $^{13}\text{C}$  NMR (101 MHz,  $\text{CDCl}_3$ )  $\delta$  170.99, 163.76, 163.25, 152.71, 145.31, 130.89, 128.49, 125.33, 124.65, 118.58, 111.76, 72.04, 65.45, 55.92, 49.76, 46.55, 39.90, 21.15, 21.02, 20.19. HRMS Calcd for  $\text{C}_{22}\text{H}_{32}\text{N}_2\text{O}_6$   $[\text{M}+\text{Na}^+]$ : 443.2158; Found: 443.2158.

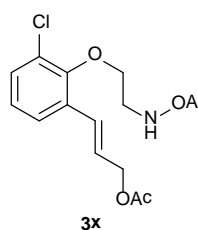



$^1\text{H}$  NMR (400 MHz,  $\text{CDCl}_3$ )  $\delta$  7.49 (s, 1H), 7.37 (dd,  $J = 7.8, 1.4$  Hz, 1H), 7.32 – 7.28 (m, 1H), 7.06 – 7.02 (m, 1H), 6.94 (d,  $J = 16.0$  Hz, 1H), 6.30 (dt,  $J = 16.0, 6.4$  Hz, 1H), 4.77 (dd,  $J = 6.4, 1.2$  Hz, 2H), 4.71 (dt,  $J = 13.4, 6.7$  Hz, 1H), 4.04 (dd,  $J = 9.3, 4.2$  Hz, 2H), 3.71 (dd,  $J = 11.0, 5.5$  Hz, 2H), 3.53 (dt,  $J = 13.6, 6.8$  Hz, 1H), 2.10 (s, 3H), 1.44 (d,  $J = 6.8$  Hz, 6H), 1.24 (d,  $J = 6.7$  Hz, 6H).  $^{13}\text{C}$  NMR (101 MHz,  $\text{CDCl}_3$ )  $\delta$  170.98, 163.66, 162.93, 152.04, 132.12, 129.97, 128.34, 128.02, 126.53, 125.57, 125.31, 72.04, 65.18, 49.77, 46.65, 39.53, 32.38, 32.31, 21.00, 20.16, 18.76. HRMS Calcd for  $\text{C}_{21}\text{H}_{29}\text{ClN}_2\text{O}_5$  [ $\text{M}+\text{Na}^+$ ]: 447.1663; Found: 447.1662.

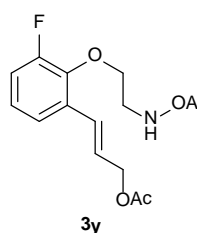

$^1\text{H}$  NMR (400 MHz,  $\text{CDCl}_3$ )  $\delta$  7.43 (s, 1H), 7.28 – 7.20 (m, 1H), 7.00 (ddd,  $J = 24.4, 12.2, 9.9$  Hz, 3H), 6.32 (dt,  $J = 16.0, 6.4$  Hz, 1H), 4.78 (dd,  $J = 6.4, 1.2$  Hz, 2H), 4.76 – 4.67 (m, 1H), 4.15 (t,  $J = 5.1$  Hz, 2H), 3.68 (dd,  $J = 10.8, 5.5$  Hz, 2H), 3.53 (dt,  $J = 13.6, 6.8$  Hz, 1H), 2.11 (s, 3H), 1.45 (d,  $J = 6.8$  Hz, 7H), 1.25 (d,  $J = 6.7$  Hz, 7H).  $^{13}\text{C}$  NMR (101 MHz,  $\text{CDCl}_3$ )  $\delta$  170.99, 163.63, 162.87, 157.04, 154.59, 143.81, 143.69, 131.76, 131.74, 127.73, 127.70, 126.21, 124.27, 124.19, 122.08, 122.04, 116.31, 116.12, 72.48, 72.43, 65.29, 49.76, 46.65, 39.55, 21.13, 20.96, 20.16. HRMS Calcd for  $\text{C}_{21}\text{H}_{29}\text{N}_2\text{O}_5$  [ $\text{M}+\text{Na}^+$ ]: 431.1958; Found: 431.1960.

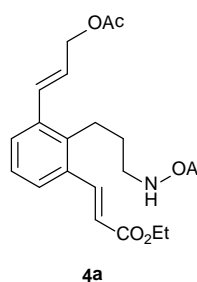

$^1\text{H}$  NMR (400 MHz,  $\text{CDCl}_3$ )  $\delta$  8.00 (d,  $J = 15.7$  Hz, 1H), 7.58 – 7.34 (m, 2H), 7.22 – 7.11 (m, 2H), 6.98 (dd,  $J = 15.6, 10.5$  Hz, 1H), 6.39 – 6.28 (m, 1H), 6.14 – 6.06 (m, 1H), 4.77 (dt,  $J = 6.6, 3.4$  Hz, 2H), 4.69 – 4.62 (m, 1H), 4.28 (q,  $J = 7.1$  Hz, 2H), 3.51 (dt,  $J = 13.6, 6.8$  Hz, 1H), 3.35 (dd,  $J = 13.2, 6.7$  Hz, 2H), 2.89 – 2.77 (m, 2H), 2.10 (s, 3H), 1.82 – 1.66 (m, 2H), 1.43 (d,  $J = 6.8$  Hz, 6H), 1.35 (t,  $J = 7.1$  Hz, 3H), 1.23 (d,  $J = 6.7$  Hz, 6H).  $^{13}\text{C}$  NMR (101 MHz,  $\text{CDCl}_3$ )  $\delta$  171.32, 171.11, 166.96, 163.86, 163.36, 142.38, 138.65, 136.68, 133.96, 132.20, 128.71, 126.93, 126.88, 120.99, 65.39, 60.76, 49.83, 46.58, 38.97, 30.51, 29.46, 21.20, 20.99, 20.19, 14.47. HRMS Calcd for  $\text{C}_{27}\text{H}_{38}\text{N}_2\text{O}_6$  [ $\text{M}+\text{Na}^+$ ]: 509.2628; Found: 509.2630.

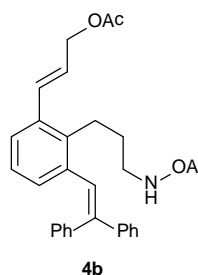

$^1\text{H}$  NMR (400 MHz,  $\text{CDCl}_3$ )  $\delta$  7.39 – 7.32 (m, 5H), 7.26 – 7.19 (m, 4H), 7.13 – 6.96 (m, 4H), 6.86 (t,  $J = 7.6$  Hz, 1H), 6.79 (d,  $J = 7.0$  Hz, 1H), 6.11 (dt,  $J = 15.5, 6.5$  Hz, 1H), 4.79 (dd,  $J = 6.5, 0.9$  Hz, 2H), 4.69 (dt,  $J = 13.4, 6.7$  Hz, 1H), 3.51 (dt,  $J = 10.4, 6.8$  Hz, 1H), 3.37 (q,  $J = 6.8$  Hz, 2H), 2.91 – 2.82 (m, 2H), 2.12 (s, 3H), 1.85 – 1.77 (m, 2H), 1.43 (d,  $J = 6.8$  Hz, 6H), 1.23 (d,  $J = 6.7$  Hz, 6H).  $^{13}\text{C}$  NMR (101 MHz,  $\text{CDCl}_3$ )  $\delta$  171.16, 163.74, 163.36, 144.25, 143.45, 140.02, 138.20, 137.35, 135.61, 132.87, 130.88, 130.65, 128.38, 128.32, 128.18, 127.79, 127.29, 126.86, 125.87, 125.60, 67.99, 66.92, 65.63, 49.77, 46.56, 42.68, 39.28, 32.33, 31.07, 29.89, 27.13, 21.22, 20.99, 20.18, 18.78, 13.70. HRMS Calcd for  $\text{C}_{36}\text{H}_{42}\text{N}_2\text{O}_4$  [ $\text{M}+\text{Na}^+$ ]: 589.3042; Found: 589.3042.

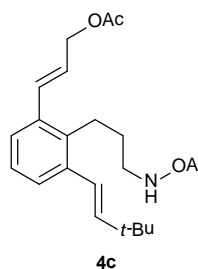

$^1\text{H}$  NMR (400 MHz,  $\text{CDCl}_3$ )  $\delta$  7.30 (t,  $J = 6.9$  Hz, 2H), 7.12 (dd,  $J = 13.4, 5.7$  Hz, 2H), 6.97 (d,  $J = 15.6$  Hz, 1H), 6.54 (d,  $J = 15.9$  Hz, 1H), 6.14 – 6.00 (m, 2H), 4.86 – 4.69 (m, 3H), 3.51 (dt,  $J = 13.6, 6.8$  Hz, 1H), 3.33 (dd,  $J = 13.1, 6.7$  Hz, 2H), 2.85 – 2.75 (m, 2H), 2.10 (s, 3H), 1.72 (dt,  $J = 12.7, 8.7$  Hz, 2H), 1.42 (d,  $J = 6.8$  Hz, 6H), 1.23 (d,  $J = 6.7$  Hz, 6H), 1.12 (s, 9H).  $^{13}\text{C}$  NMR (101 MHz,  $\text{CDCl}_3$ )  $\delta$  171.11, 163.59, 163.18, 145.08, 137.97, 136.42, 135.76, 132.91, 128.59, 128.49, 128.35, 126.70, 126.52, 125.82, 125.62, 122.55, 65.54, 49.73, 46.62, 39.19, 33.78, 29.85, 29.75, 26.39, 21.19, 21.00, 20.18. HRMS Calcd for  $\text{C}_{28}\text{H}_{42}\text{N}_2\text{O}_6$  [ $\text{M}+\text{Na}^+$ ]: 493.3042; Found: 493.3041.

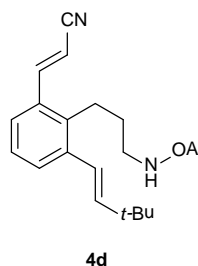

$^1\text{H}$  NMR (400 MHz,  $\text{CDCl}_3$ )  $\delta$  7.77 (d,  $J = 16.4$  Hz, 1H), 7.46 (d,  $J = 7.3$  Hz, 1H), 7.35 (d,  $J = 7.7$  Hz, 1H), 7.22 (t,  $J = 7.8$  Hz, 1H), 7.07 (br, 1H), 6.54 (d,  $J = 15.9$  Hz, 1H), 6.09 (d,  $J = 15.8$  Hz, 1H), 5.81 (d,  $J = 16.4$  Hz, 1H), 4.87 (dt,  $J = 13.4, 6.7$  Hz, 1H), 3.54 (dt,  $J = 13.6, 6.8$  Hz, 1H), 3.36 (dd,  $J = 13.4, 6.9$  Hz, 2H), 2.82 (dd,  $J = 9.2, 6.9$  Hz, 2H), 1.75 (dt,  $J = 15.1, 7.4$  Hz, 2H), 1.45 (d,  $J = 6.8$  Hz, 6H), 1.26 (d,  $J = 6.7$  Hz, 6H), 1.15 (s, 9H).  $^{13}\text{C}$  NMR (101 MHz,  $\text{CDCl}_3$ )  $\delta$  163.28, 162.67, 148.90, 146.24, 138.93, 137.70, 132.81, 129.67, 126.98, 125.00, 122.02, 118.28, 98.56,

49.65, 46.83, 39.25, 33.89, 30.38, 29.68, 26.59, 21.04, 20.20. HRMS Calcd for  $C_{26}H_{37}N_3O_2$   $[M+Na^+]$ : 423.2886; Found: 423.2891.

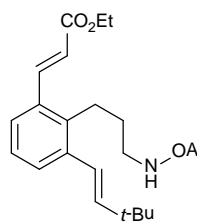

4e

$^1H$  NMR (400 MHz,  $CDCl_3$ )  $\delta$  8.02 (d,  $J = 15.7$  Hz, 1H), 7.41 (t,  $J = 6.6$  Hz, 2H), 7.18 (t,  $J = 7.7$  Hz, 1H), 7.07 (br, 1H), 6.54 (d,  $J = 15.9$  Hz, 1H), 6.33 (d,  $J = 15.7$  Hz, 1H), 6.06 (d,  $J = 15.8$  Hz, 1H), 4.77 (dt,  $J = 13.3, 6.7$  Hz, 1H), 4.27 (q,  $J = 7.1$  Hz, 2H), 3.51 (dt,  $J = 13.6, 6.8$  Hz, 1H), 3.33 (dd,  $J = 13.3, 6.8$  Hz, 2H), 3.01 – 2.73 (m, 2H), 1.79 – 1.72 (m, 2H), 1.42 (d,  $J = 6.8$  Hz, 6H), 1.34 (t,  $J = 7.1$  Hz, 3H), 1.22 (d,  $J = 6.7$  Hz, 6H), 1.13 (s, 9H).  $^{13}C$  NMR (101 MHz,  $CDCl_3$ )  $\delta$  167.06, 163.34, 162.93, 145.64, 142.73, 138.53, 138.04, 133.60, 128.66, 126.70, 125.71, 122.29, 120.50, 60.67, 49.67, 46.66, 39.20, 33.82, 30.24, 29.68, 26.45, 20.96, 20.15, 14.44. HRMS Calcd for  $C_{28}H_{42}N_2O_4$   $[M+Na^+]$ : 493.3042; Found: 493.3036.

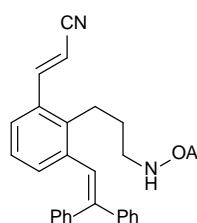

4f

$^1H$  NMR (400 MHz,  $CDCl_3$ )  $\delta$  7.76 (d,  $J = 16.4$  Hz, 1H), 7.36 (s, 5H), 7.28 – 7.19 (m, 4H), 7.06 – 6.93 (m, 6H), 5.80 (d,  $J = 16.4$  Hz, 1H), 4.80 (dt,  $J = 13.3, 6.7$  Hz, 1H), 3.53 (dt,  $J = 13.6, 6.8$  Hz, 1H), 3.37 (dd,  $J = 13.7, 7.0$  Hz, 2H), 2.97 – 2.80 (m, 2H), 1.90 – 1.74 (m, 2H), 1.43 (d,  $J = 6.8$  Hz, 6H), 1.24 (d,  $J = 6.7$  Hz, 6H).  $^{13}C$  NMR (101 MHz,  $CDCl_3$ )  $\delta$  163.37, 162.78, 148.63, 145.30, 143.02, 139.66, 139.39, 138.25, 133.60, 132.77, 130.79, 128.61, 128.47, 128.31, 128.08, 127.56, 126.34, 125.71, 125.08, 118.27, 98.39, 67.99, 67.93, 66.92, 60.54, 49.70, 46.78, 42.69, 39.38, 32.41, 32.34, 30.39, 29.84, 27.25, 21.02, 20.18, 18.79, 14.34, 13.71. HRMS Calcd for  $C_{34}H_{37}N_3O_2$   $[M+Na^+]$ : 542.2782; Found: 542.2789.

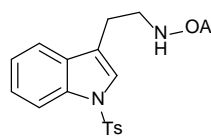

5

$^1H$  NMR (400 MHz,  $CDCl_3$ )  $\delta$  7.99 (d,  $J = 8.3$  Hz, 1H), 7.79 (d,  $J = 8.3$  Hz, 2H), 7.53 (d,  $J = 7.7$  Hz, 1H), 7.44 (s, 1H), 7.35 – 7.32 (m, 1H), 7.25 – 7.23 (m, 3H), 7.06 (br, 1H), 4.75 (dt,  $J = 13.3, 6.7$  Hz, 1H), 3.61 (dd,  $J = 13.5, 7.0$  Hz, 2H), 3.54 (dt,  $J = 13.6, 6.8$  Hz, 1H), 2.95 (t,  $J = 7.1$  Hz, 2H), 2.35 (s, 3H), 1.45 (d,  $J = 6.8$  Hz, 6H), 1.24 (d,  $J = 6.7$  Hz, 6H).  $^{13}C$  NMR (101 MHz,  $CDCl_3$ )

$\delta$  163.37, 162.87, 144.96, 135.41, 135.33, 130.69, 130.04, 127.01, 124.99, 123.63, 123.31, 119.50, 119.45, 113.91, 49.78, 46.74, 38.71, 25.08, 21.71, 20.99, 20.20. HRMS Calcd for  $C_{25}H_{41}N_3O_4$   $[M+Na^+]$ : 492.1933; Found: 492.1942.

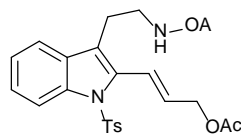

**6**

$^1H$  NMR (400 MHz,  $CDCl_3$ )  $\delta$  8.17 (d,  $J = 7.9$  Hz, 1H), 7.64 (d,  $J = 8.4$  Hz, 2H), 7.49 – 7.48 (m, 1H), 7.31 – 7.20 (m, 5H), 7.07 (d,  $J = 6.3$  Hz, 1H), 7.00 (br, 1H), 5.21 – 5.16 (m, 1H), 4.78 (dd,  $J = 13.4, 6.7$  Hz, 1H), 3.93 (dd,  $J = 7.0, 1.5$  Hz, 2H), 3.54 (dd,  $J = 13.6, 6.8$  Hz, 1H), 3.45 (dd,  $J = 14.3, 6.7$  Hz, 2H), 2.97 – 2.93 (m, 1H), 2.35 (s, 3H), 2.21 (s, 3H), 1.44 (d,  $J = 6.8$  Hz, 6H), 1.23 (d,  $J = 6.7$  Hz, 6H).  $^{13}C$  NMR (101 MHz,  $CDCl_3$ )  $\delta$  167.95, 163.28, 162.65, 144.84, 136.69, 136.02, 135.99, 134.53, 130.11, 129.97, 126.85, 126.50, 124.71, 123.78, 118.64, 118.27, 115.29, 111.15, 49.62, 46.75, 38.97, 29.84, 29.46, 24.27, 22.20, 21.70, 21.00, 20.88, 20.16. HRMS Calcd for  $C_{30}H_{46}N_3O_6$   $[M+Na^+]$ : 567.2403; Found: 567.2413.

## 7. References

- [1] Mei, T.-S.; Wang, X.; Yu, J.-Q. *J. Am. Chem. Soc.* **2009**, *131*, 10806.
- [2] He, G.; Lu, C.; Zhao, Y.; Nack, W. A.; Chen, G. *Org. Lett.* **2012**, *14*, 2944.
- [3] He, G.; Zhao, Y.; Zhang, S.; Lu, C.; Chen, G. *J. Am. Chem. Soc.* **2012**, *134*, 3.

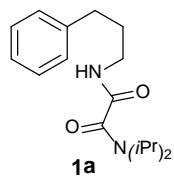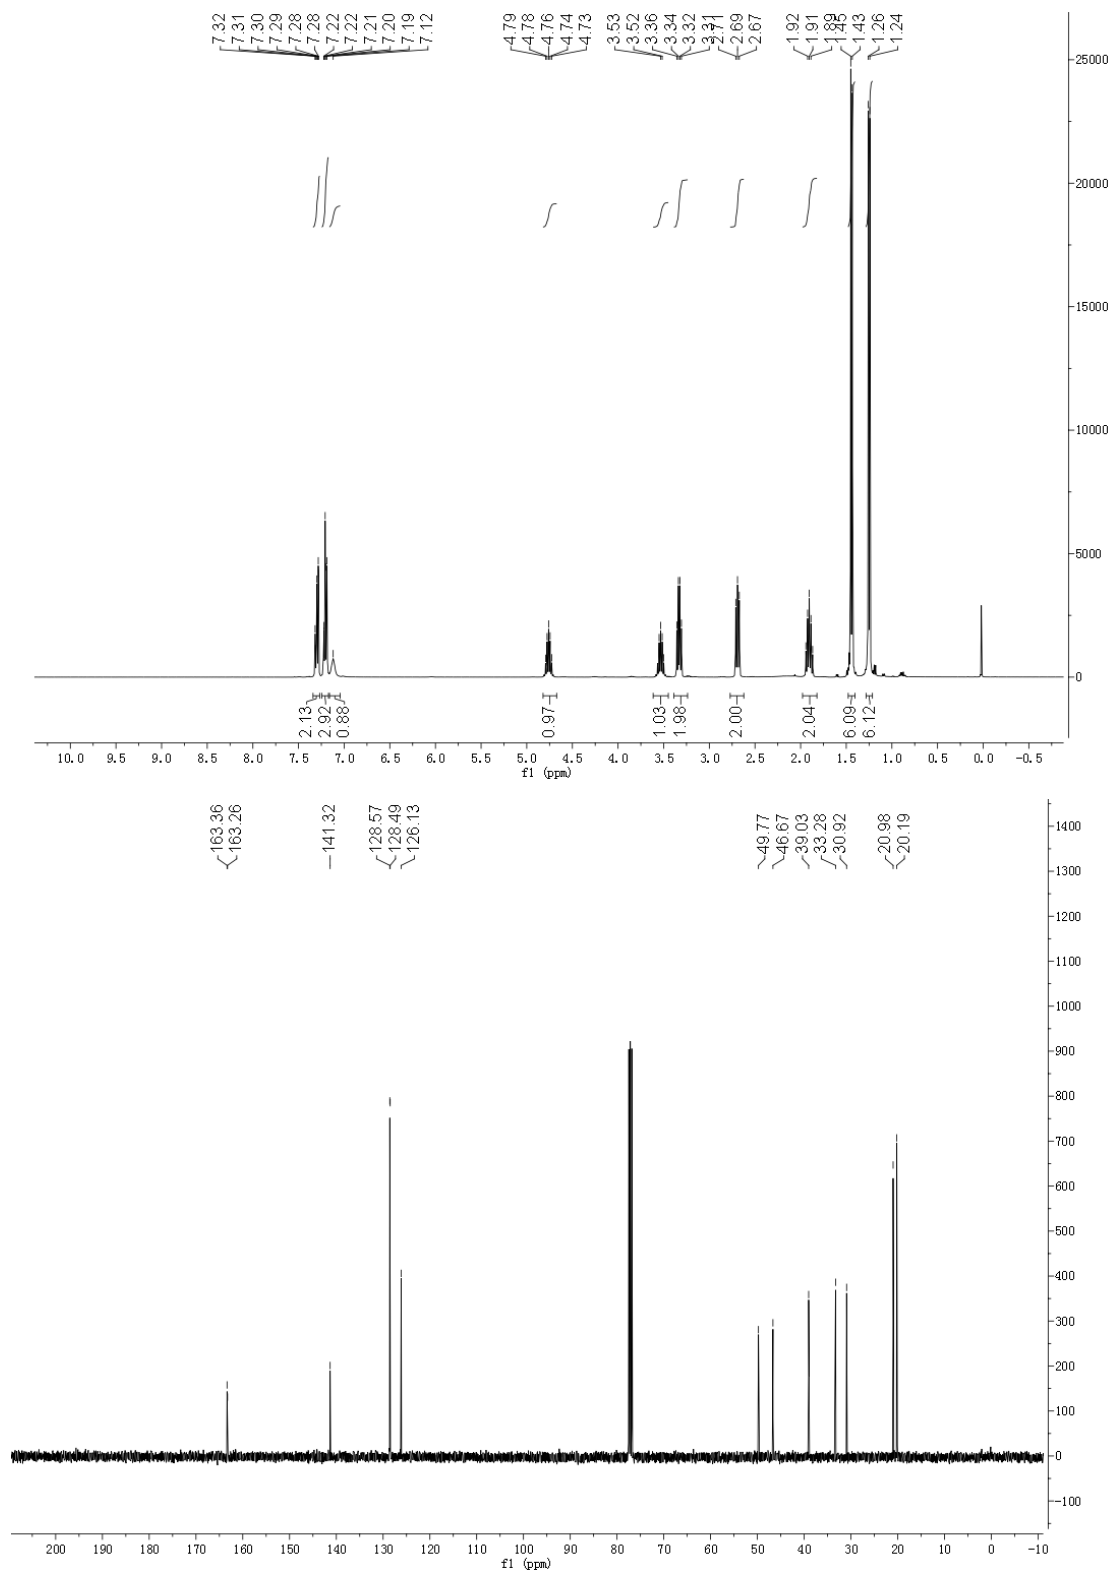

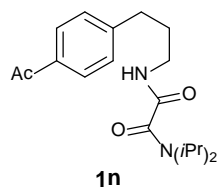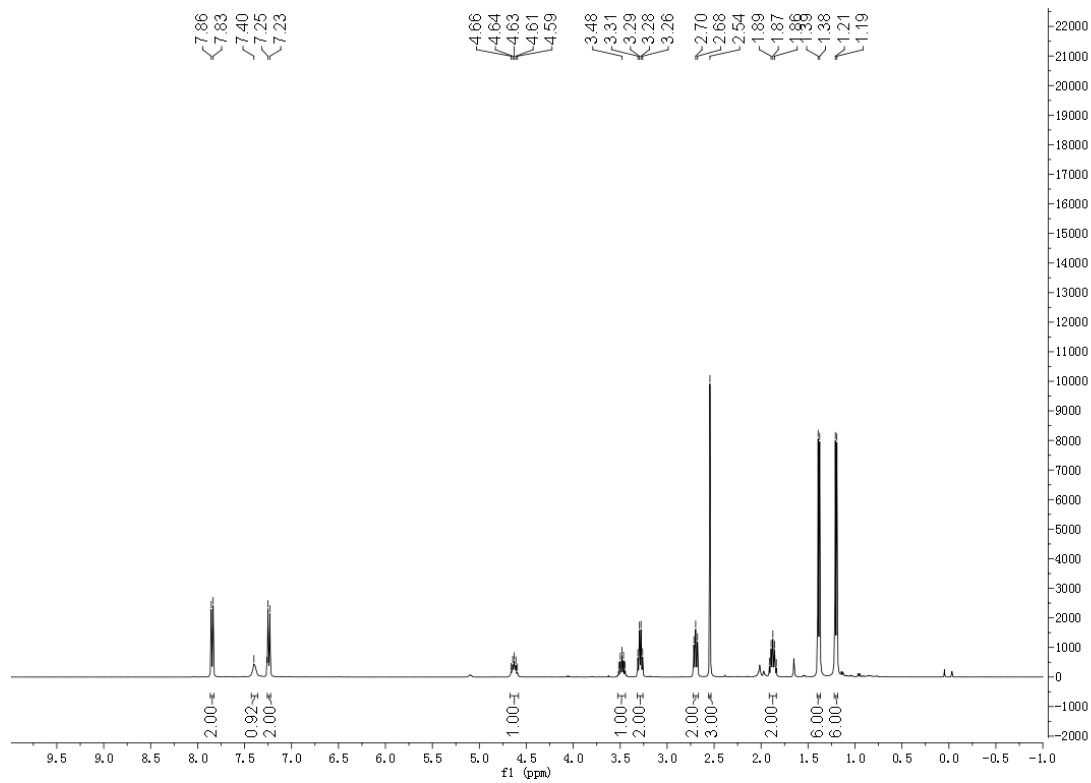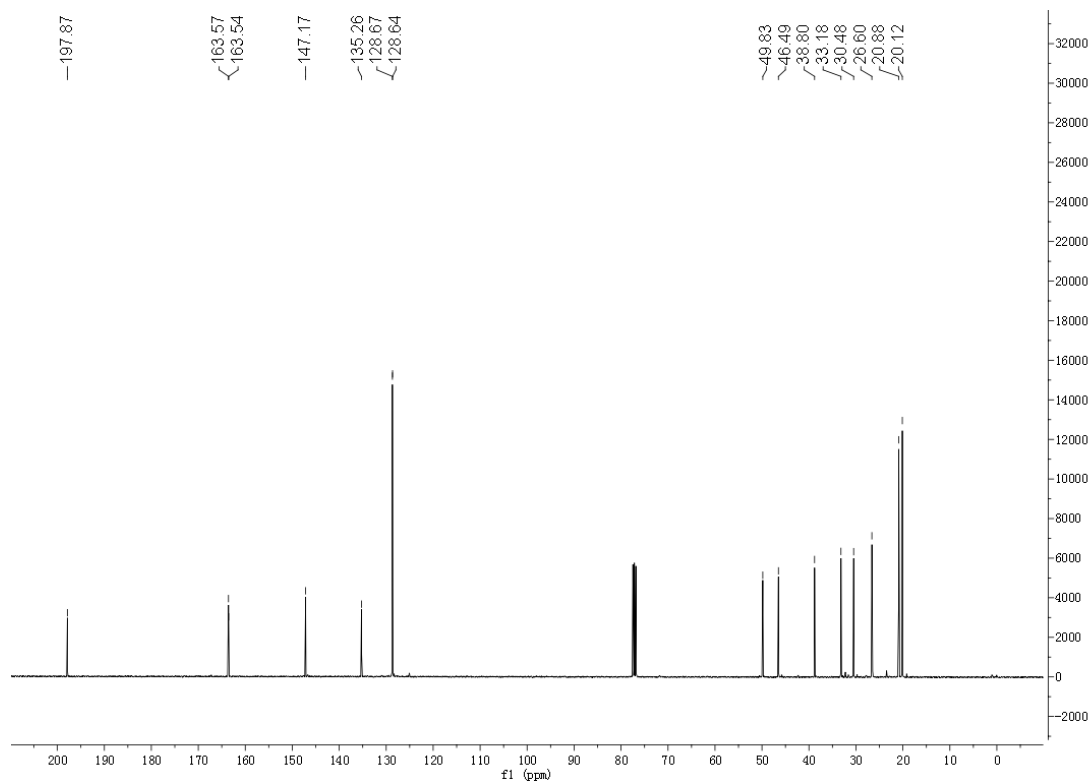

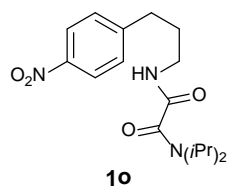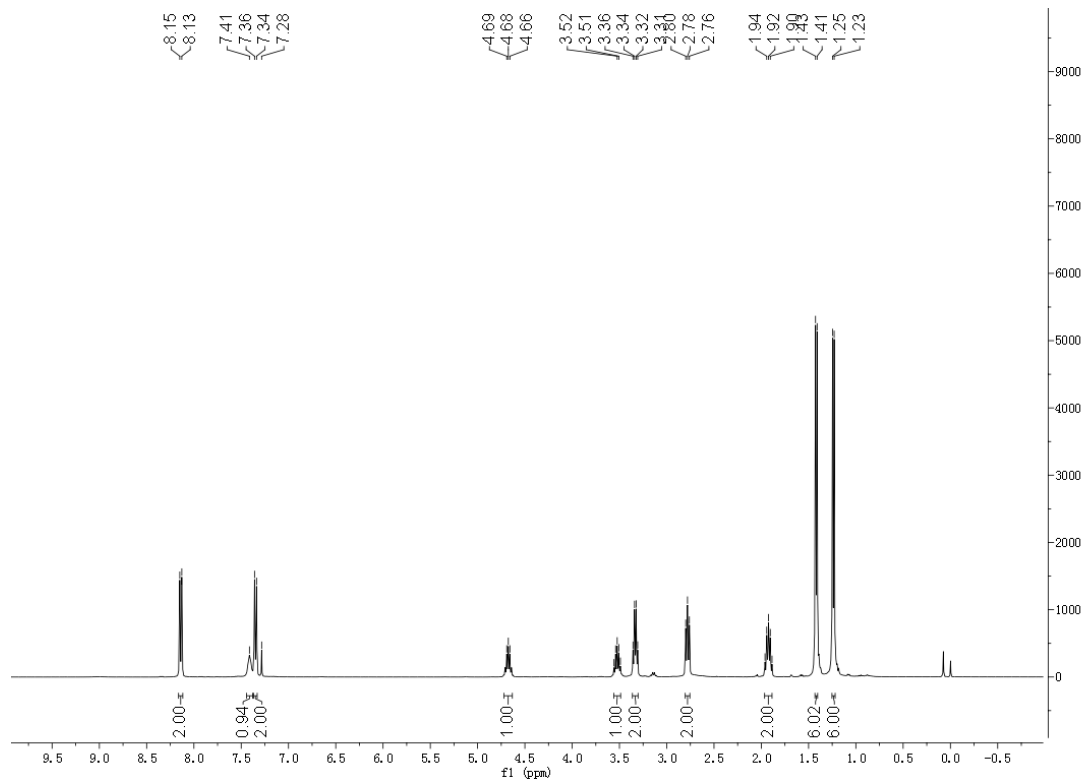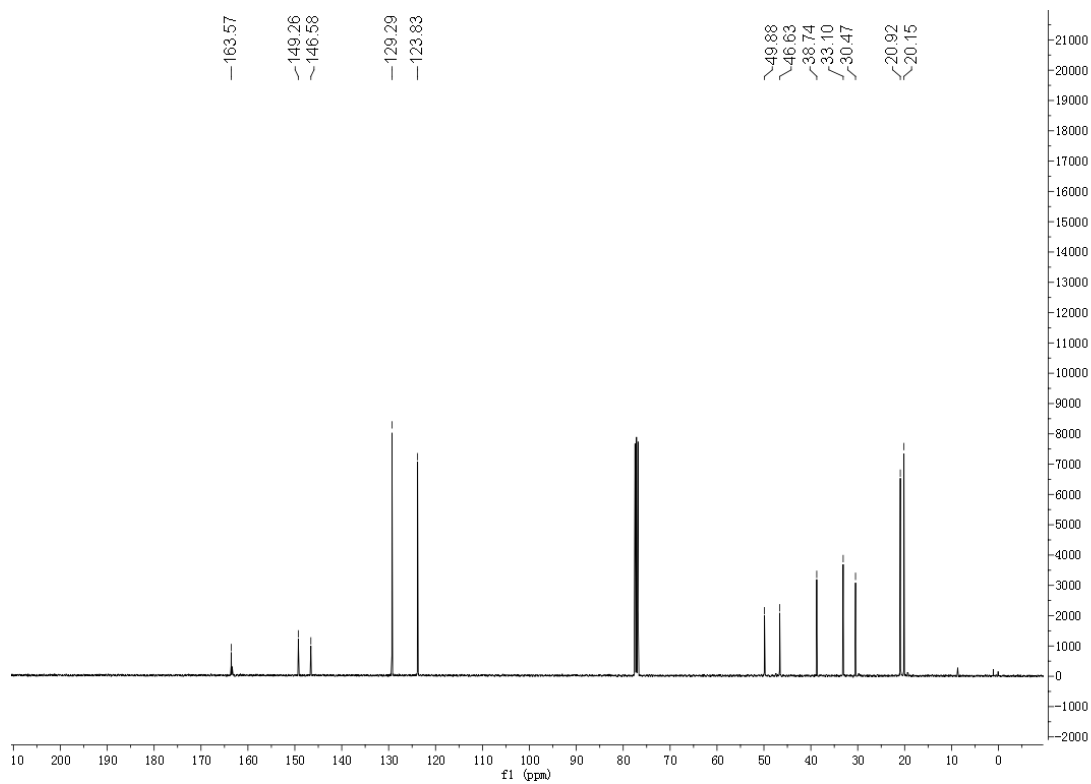

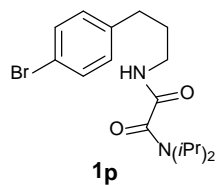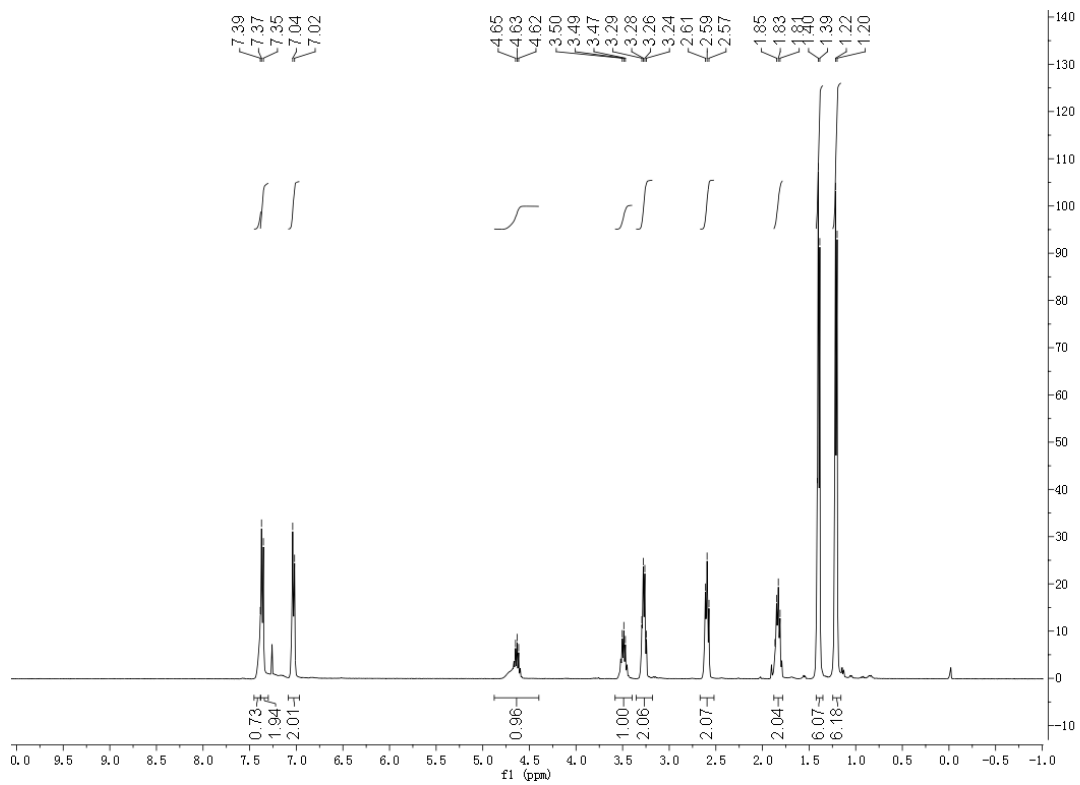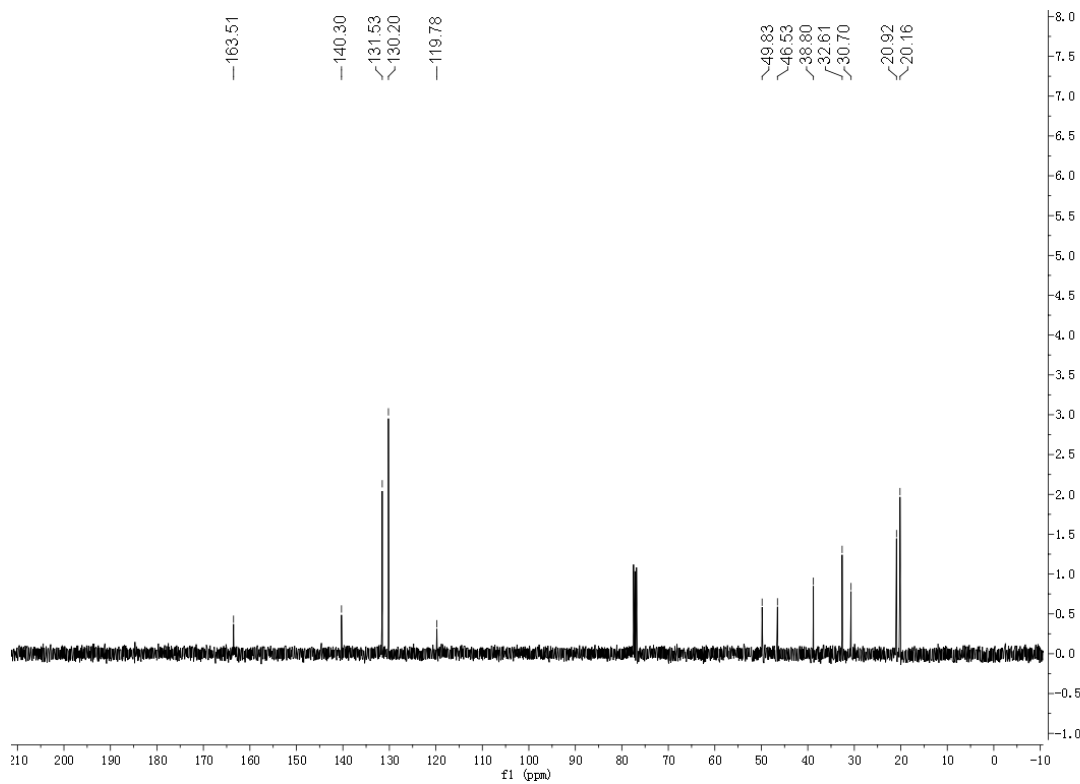



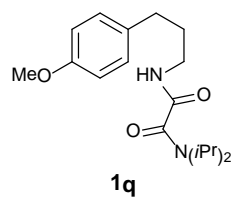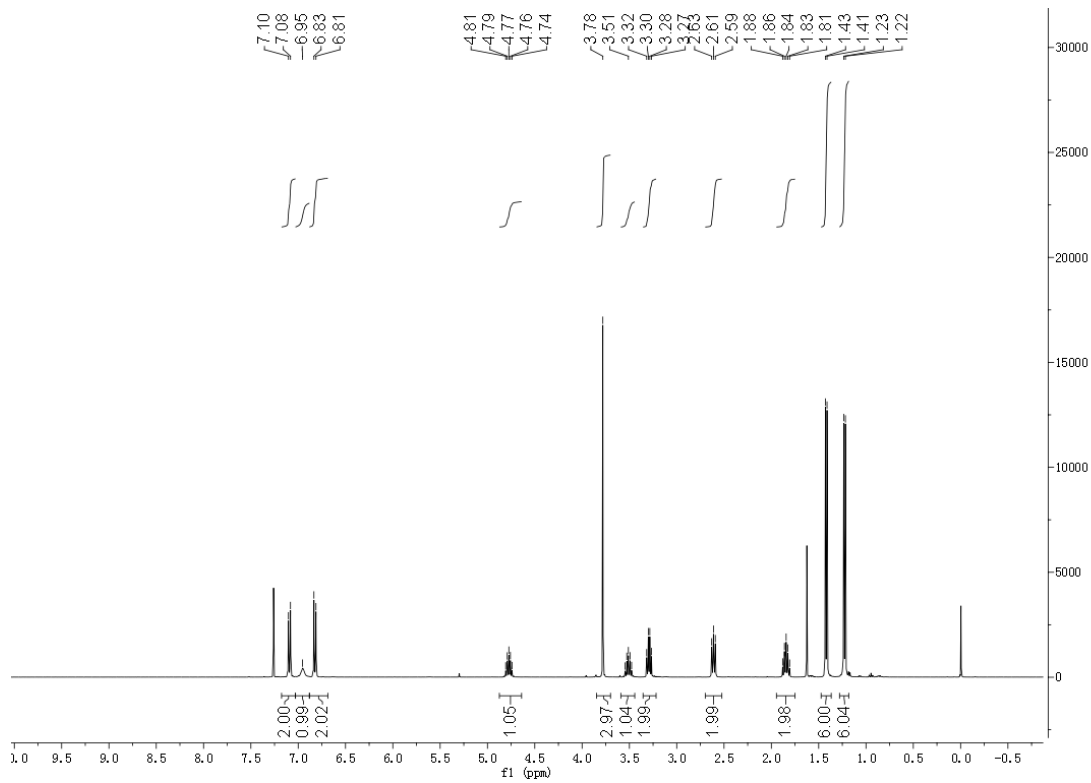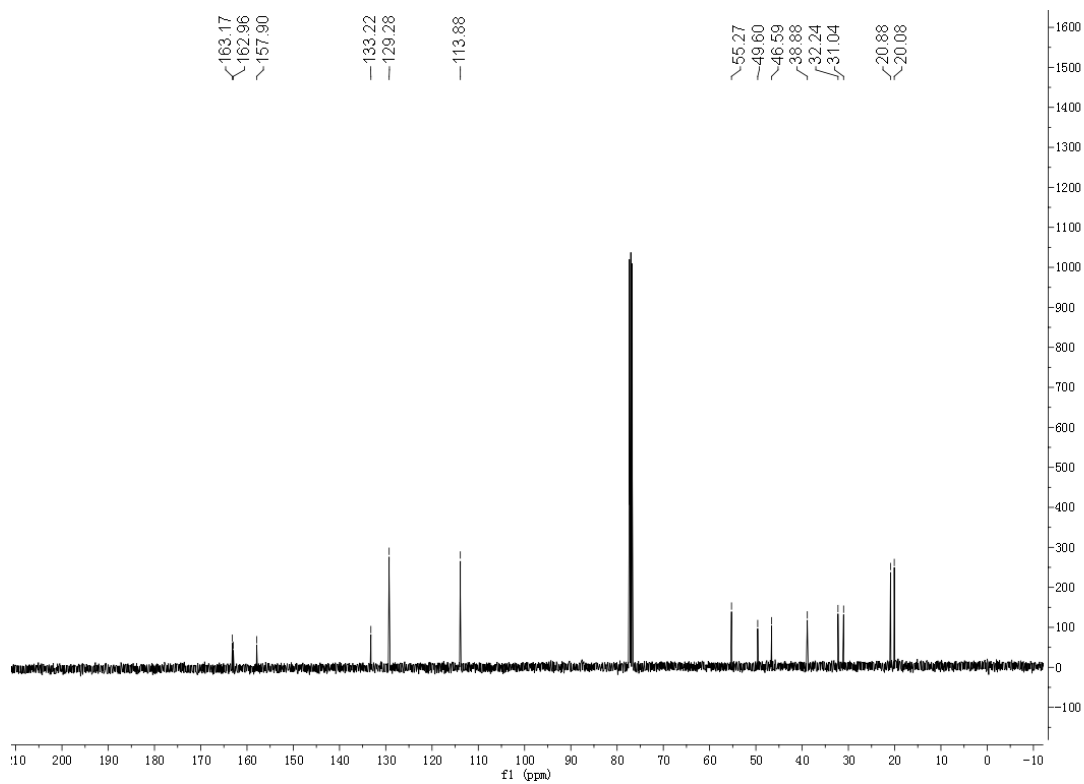

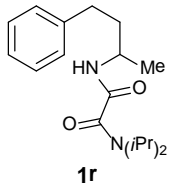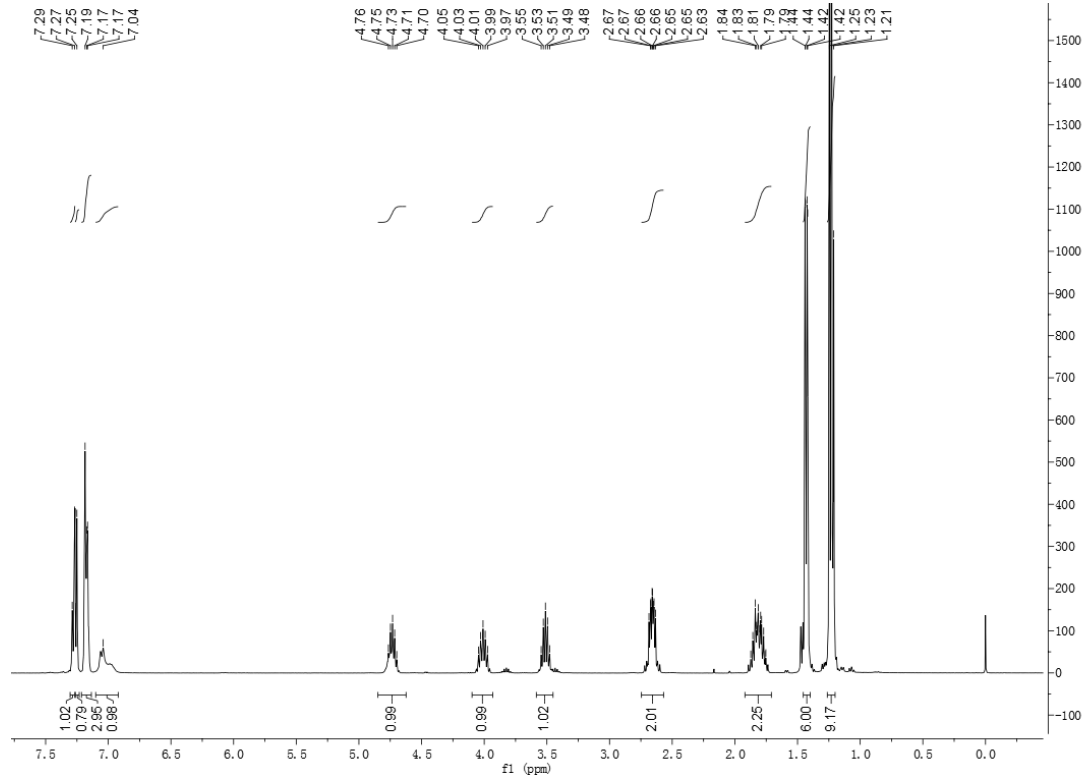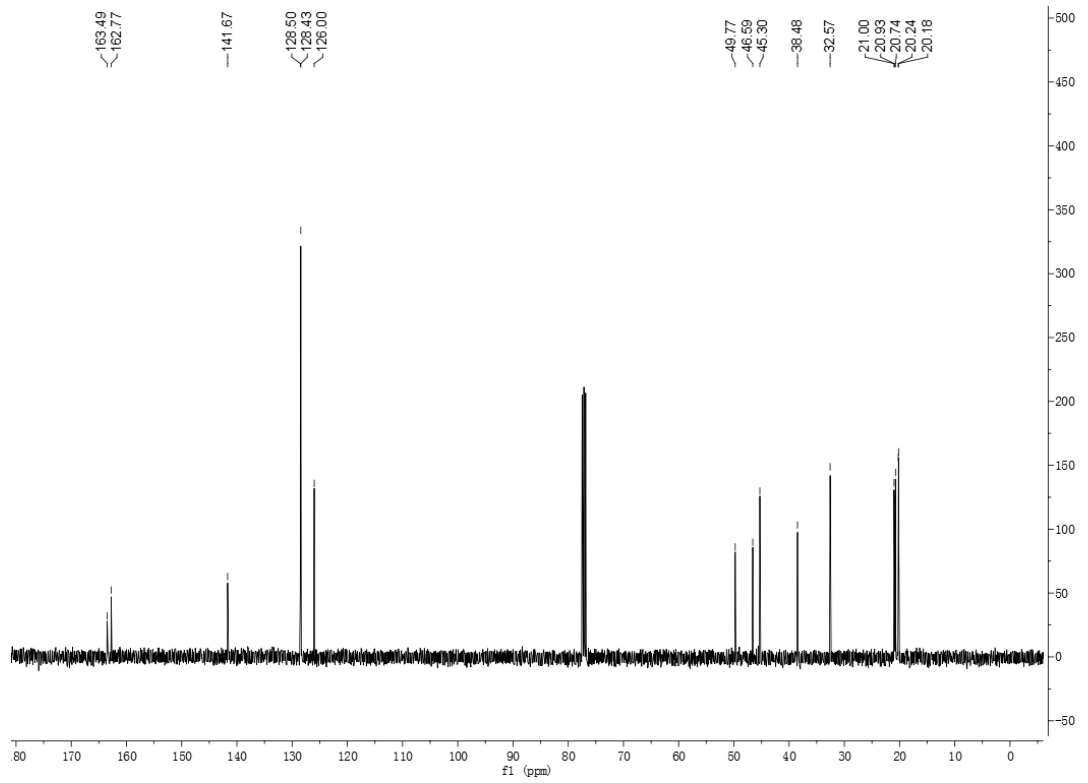

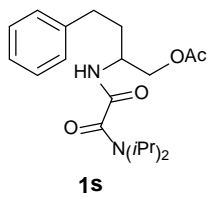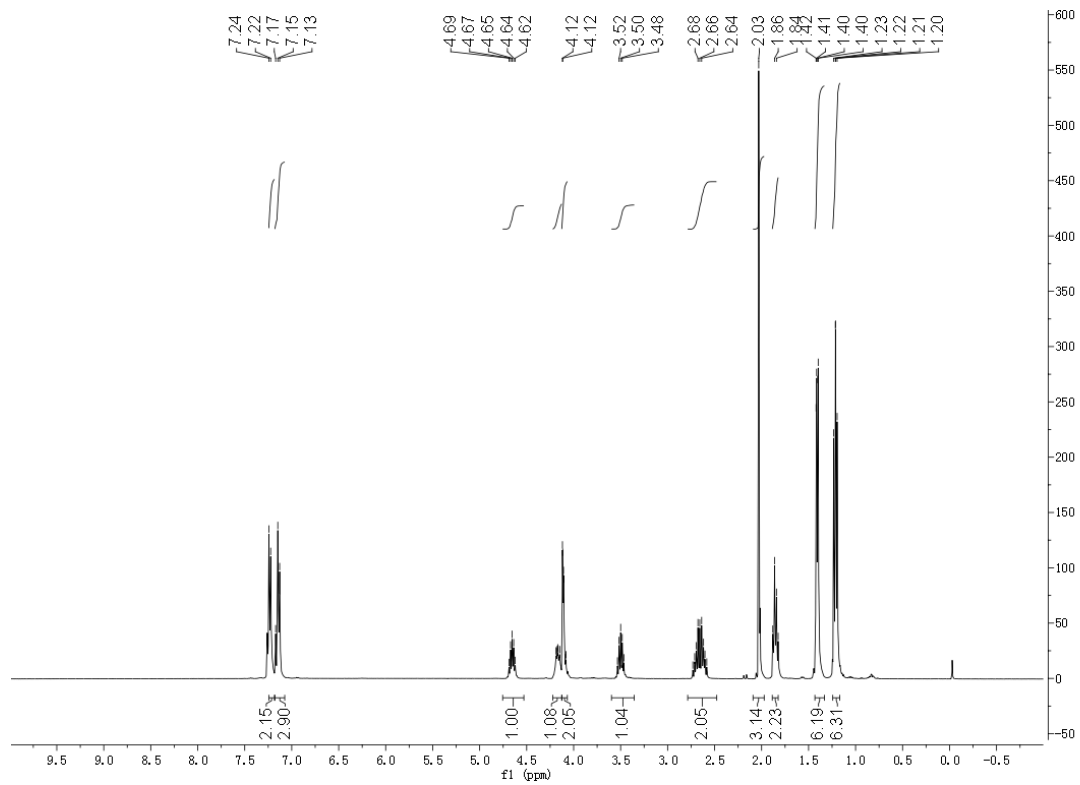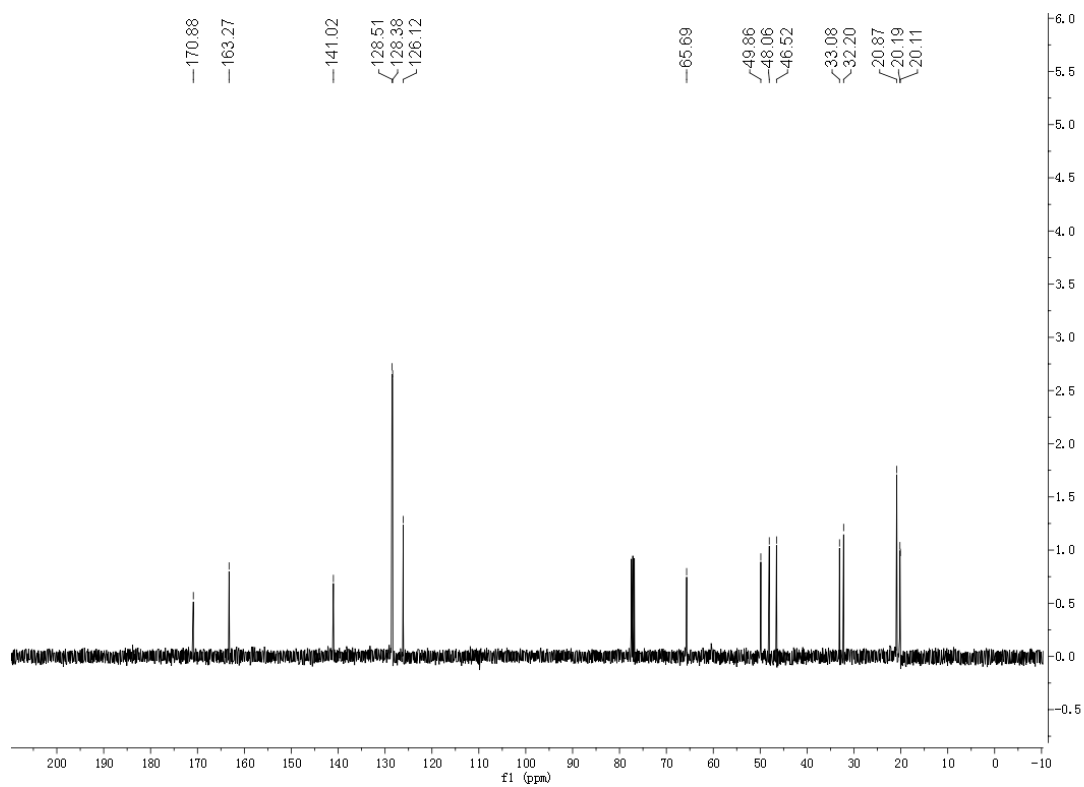

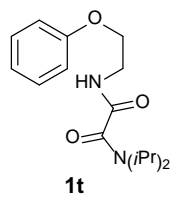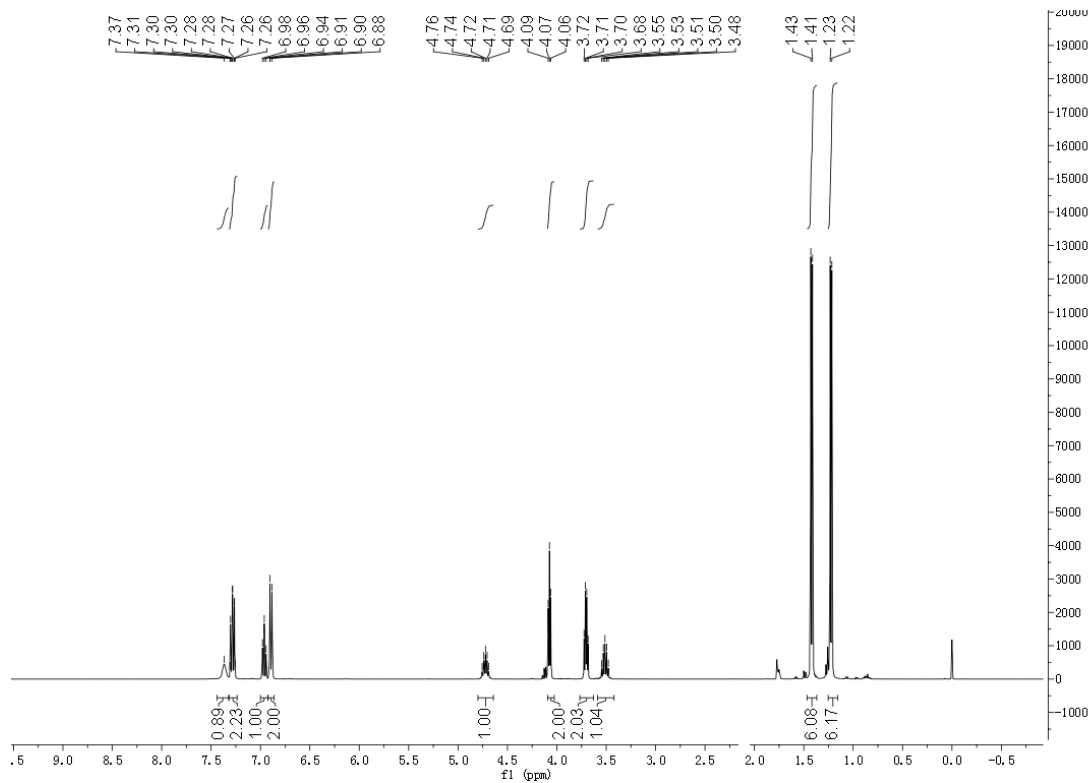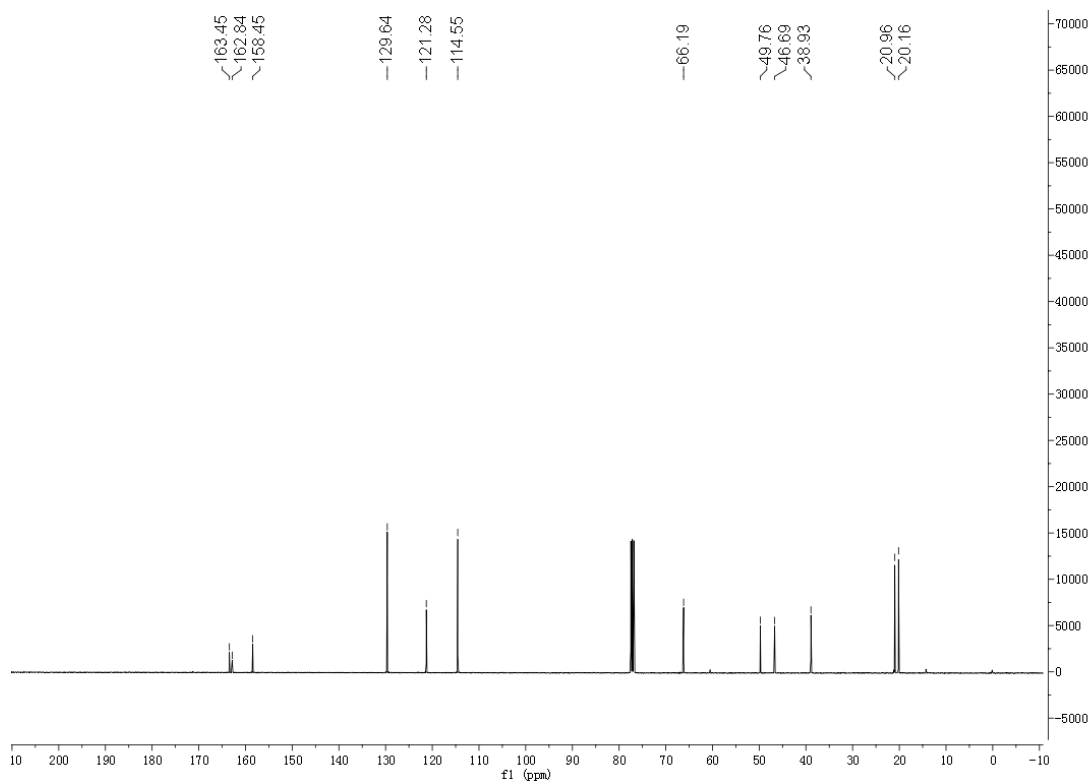

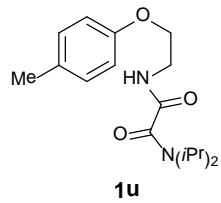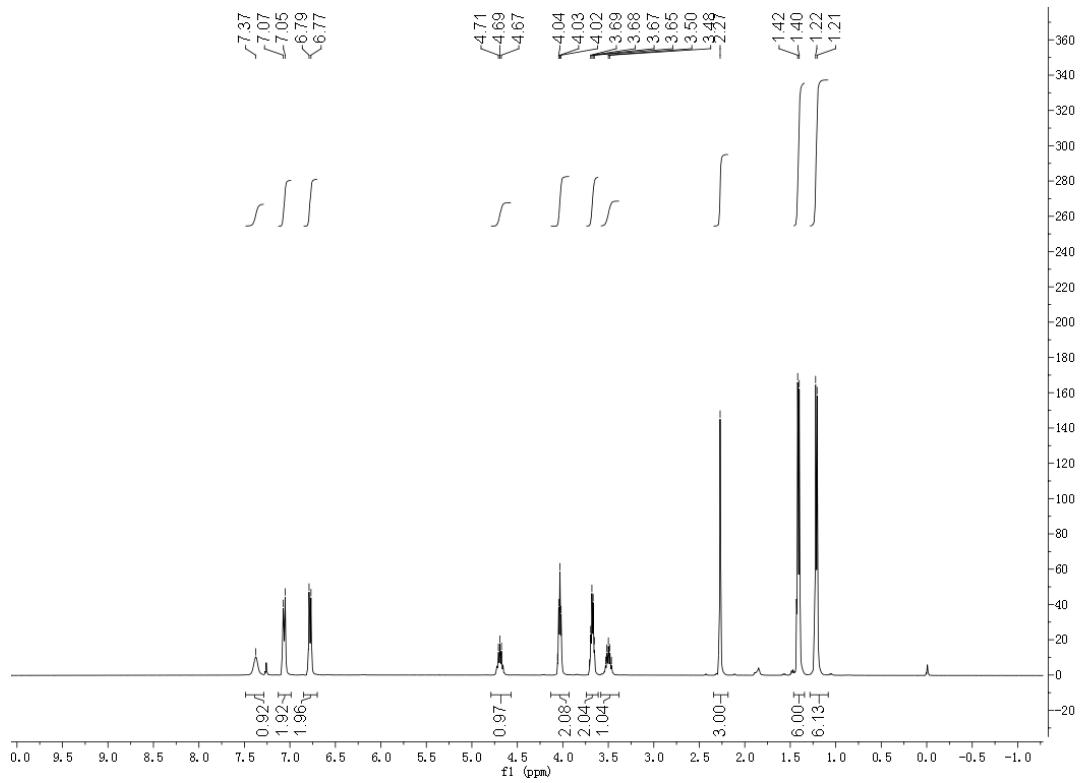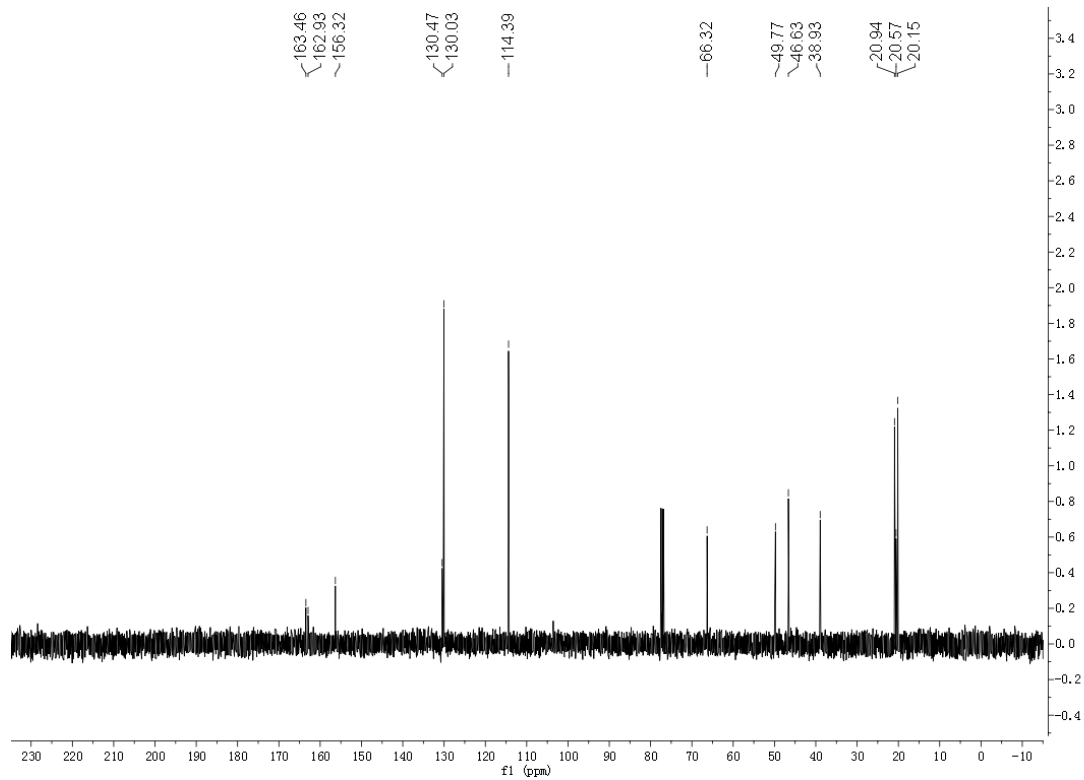

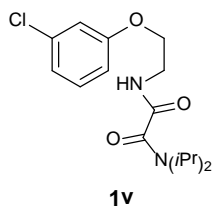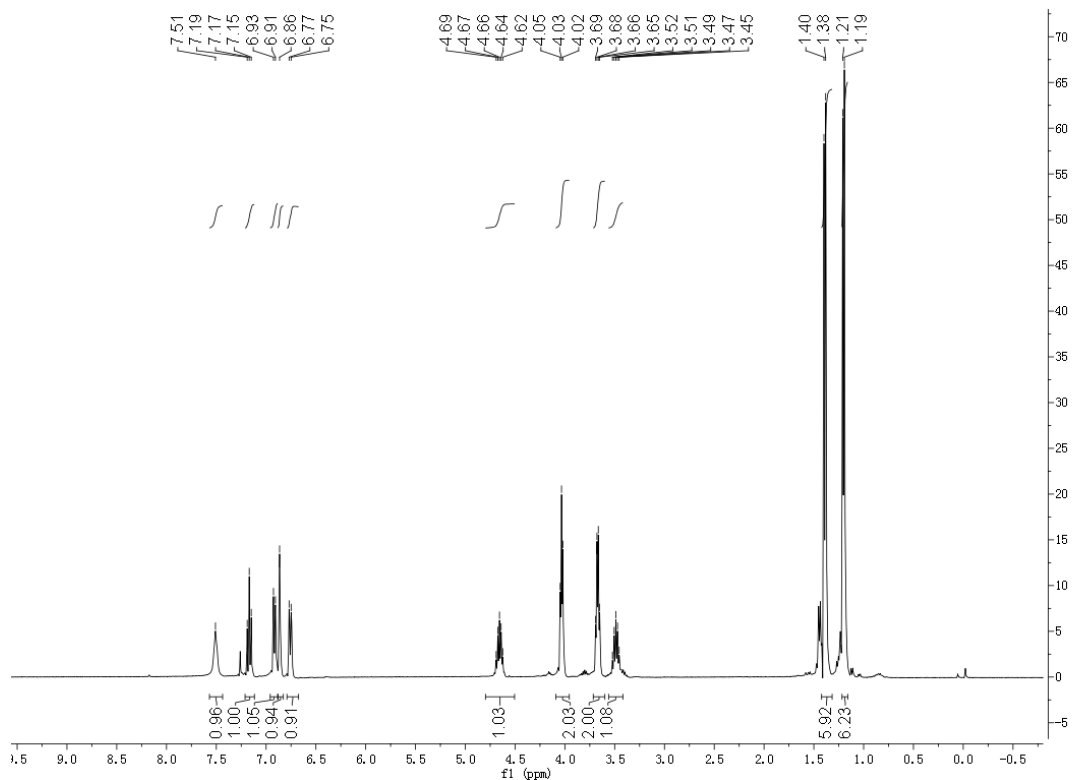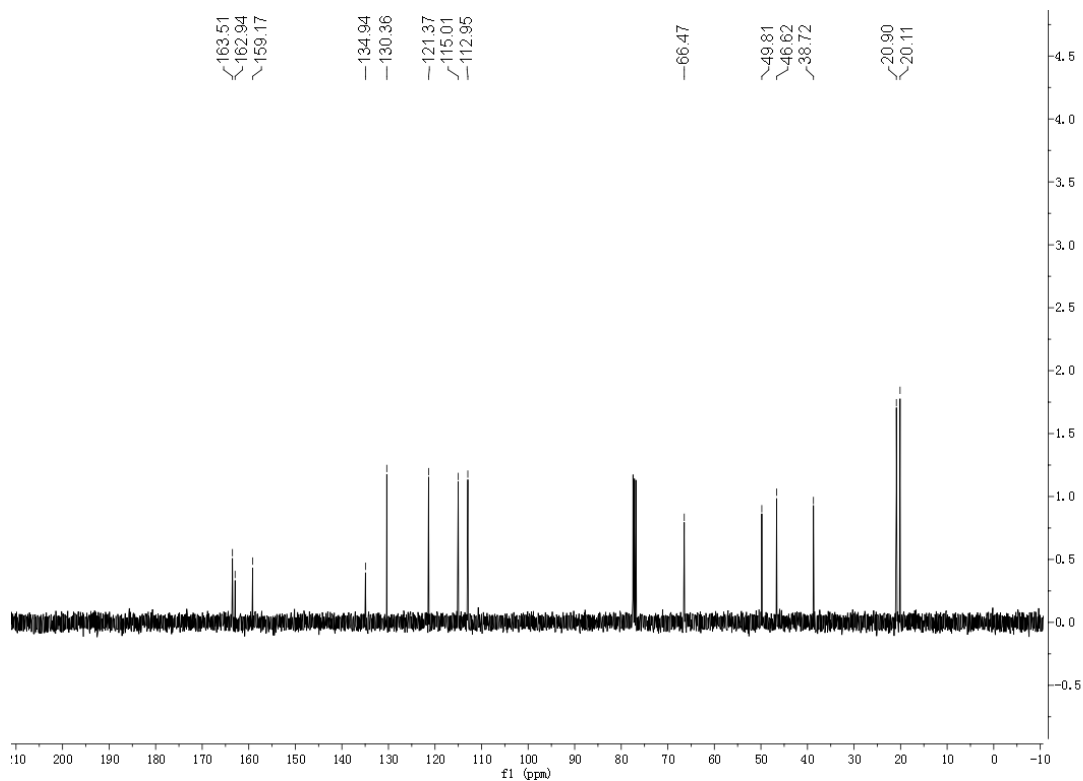

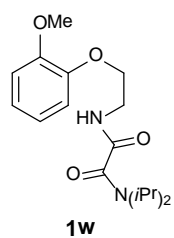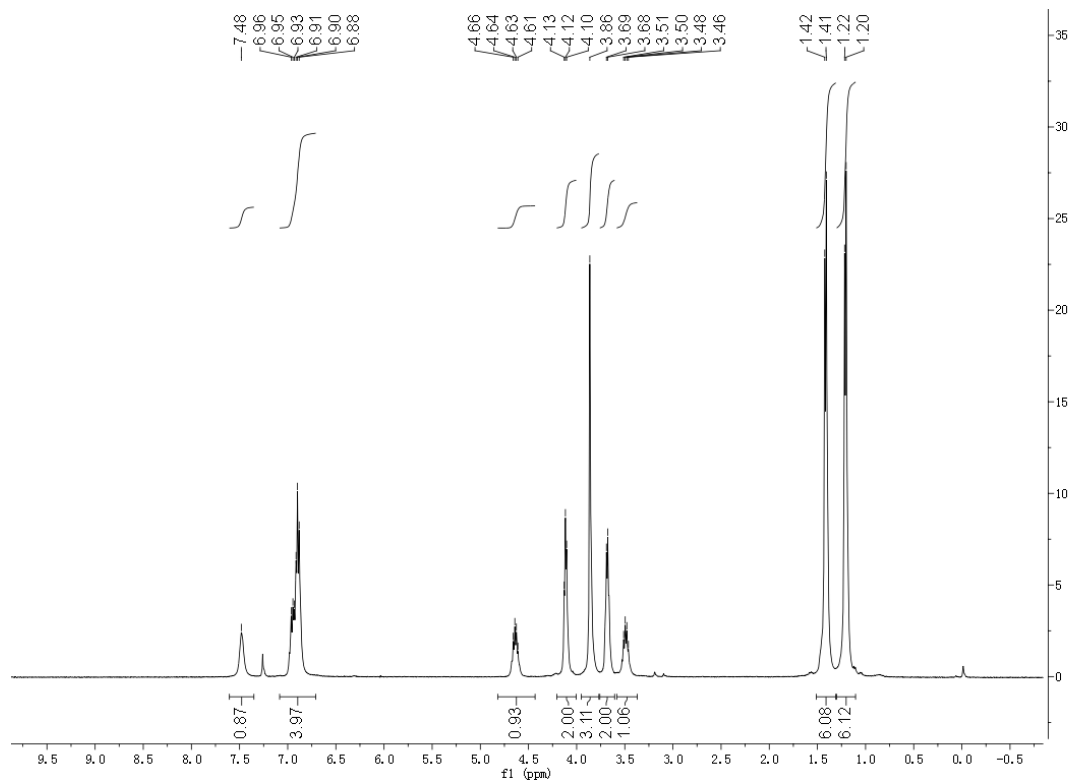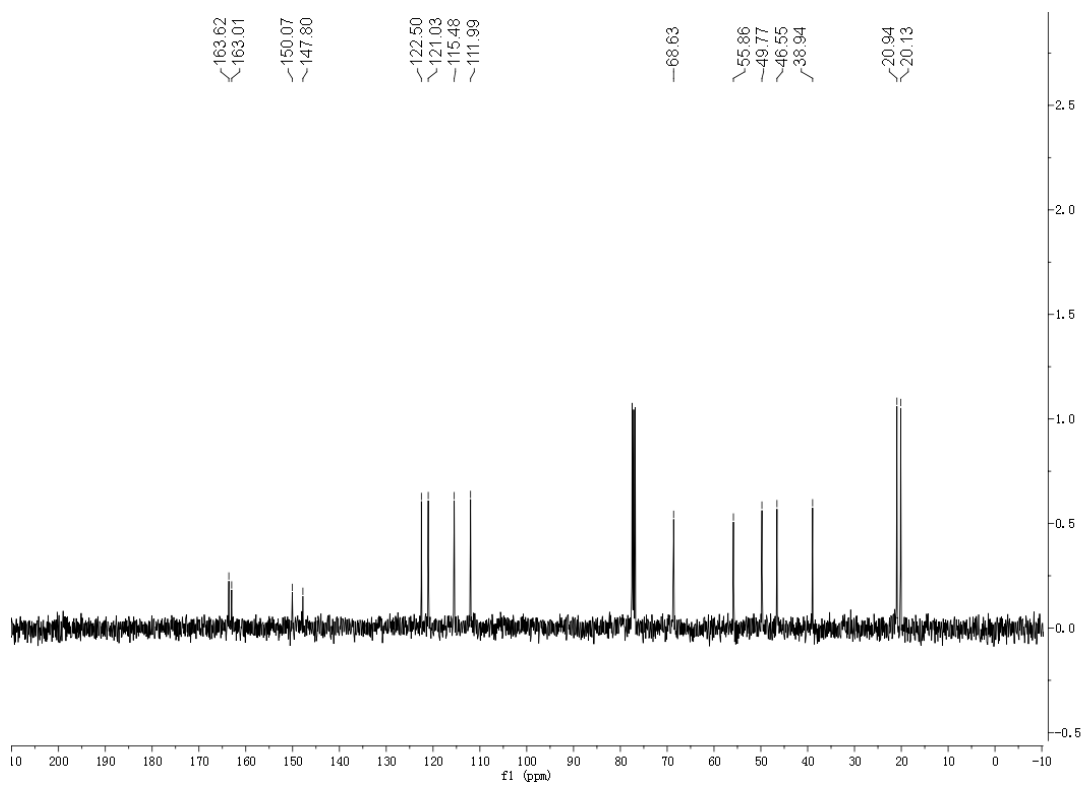

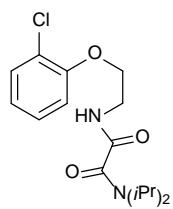

**1x**

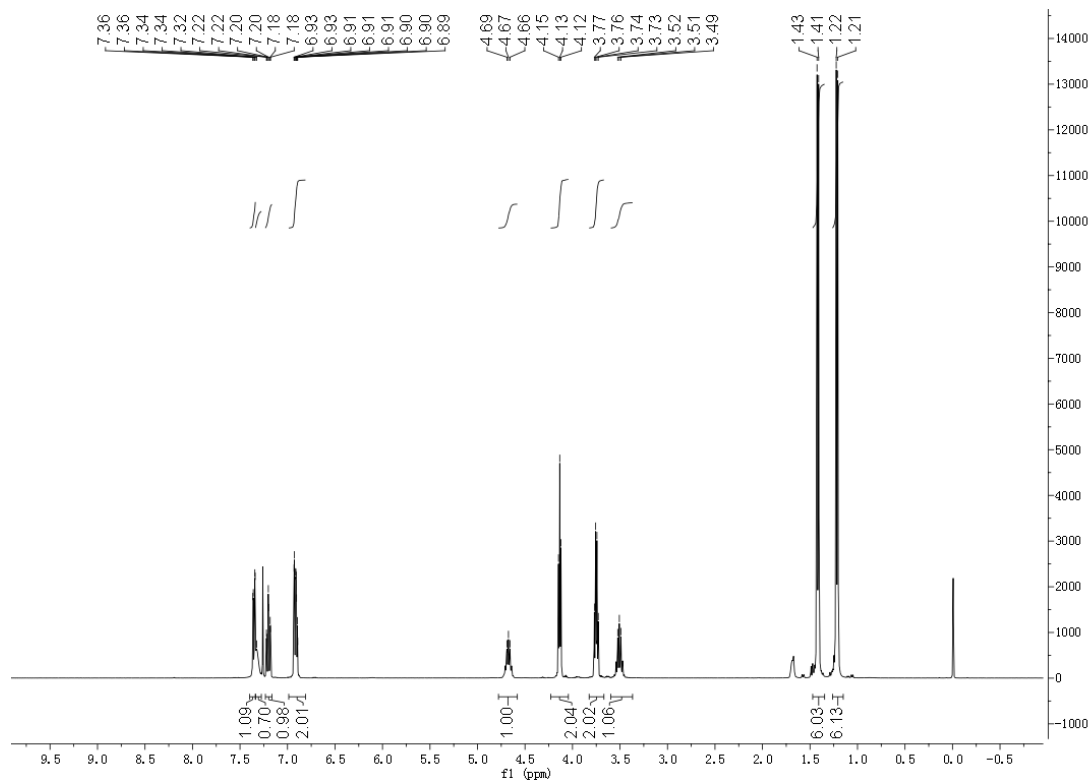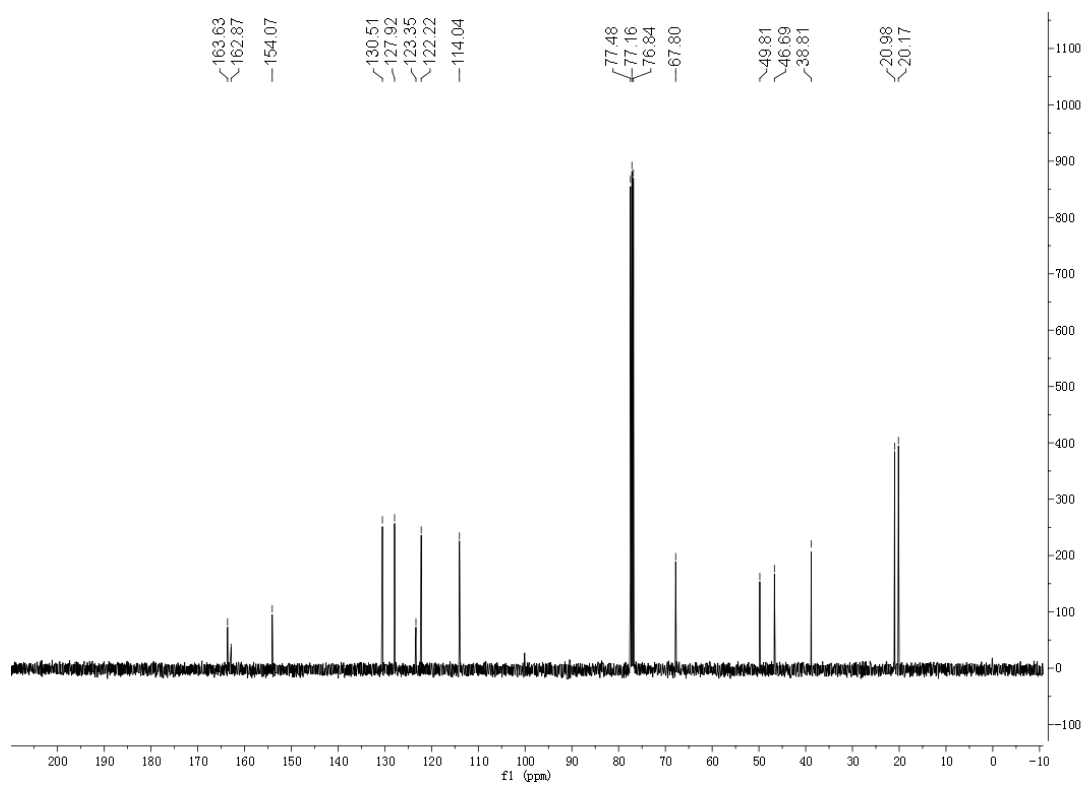



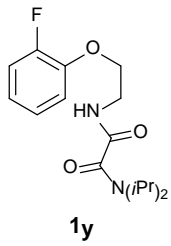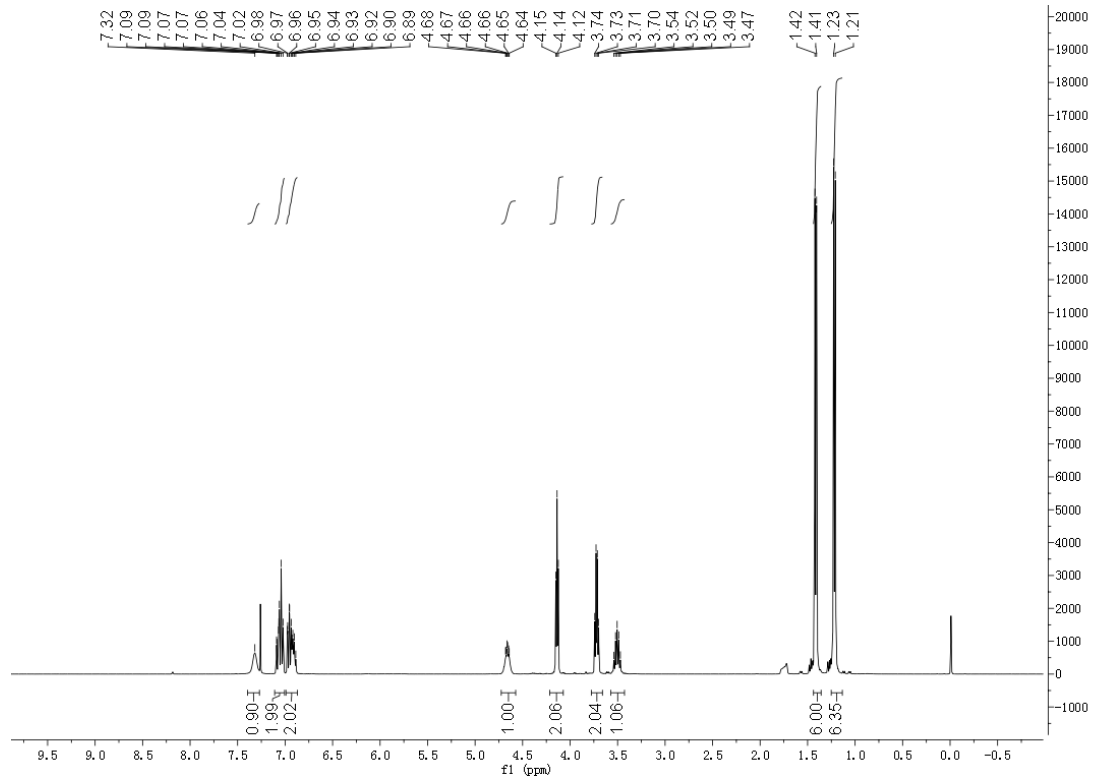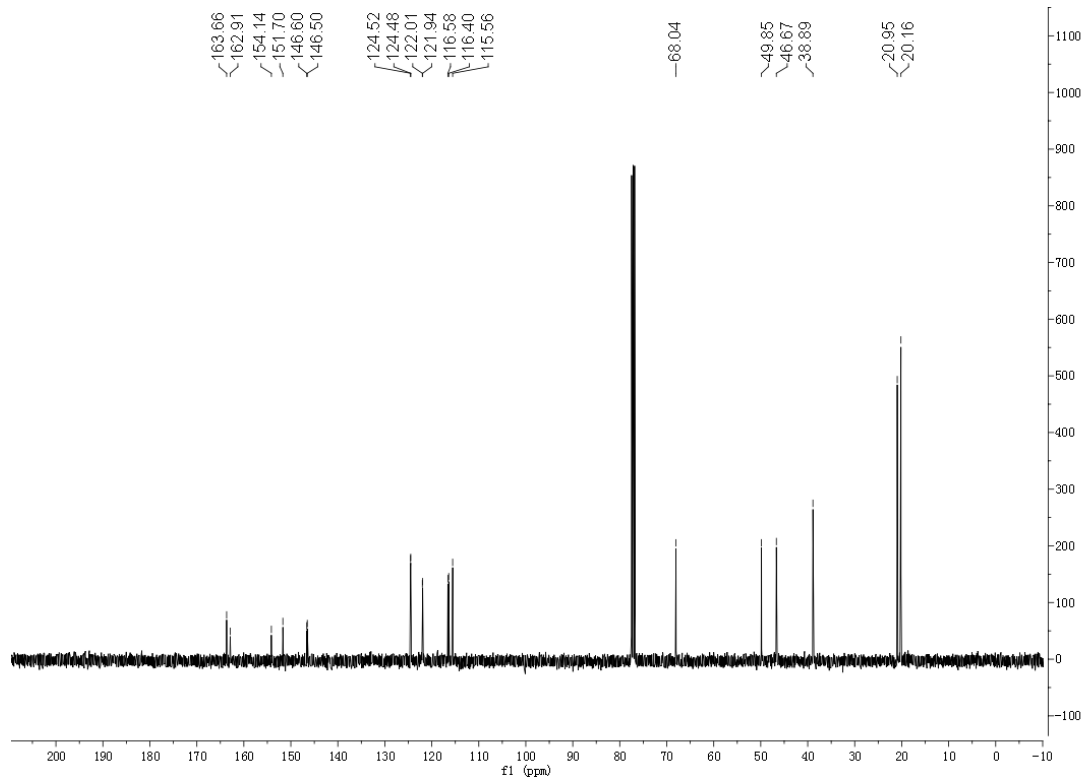

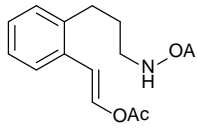

3a

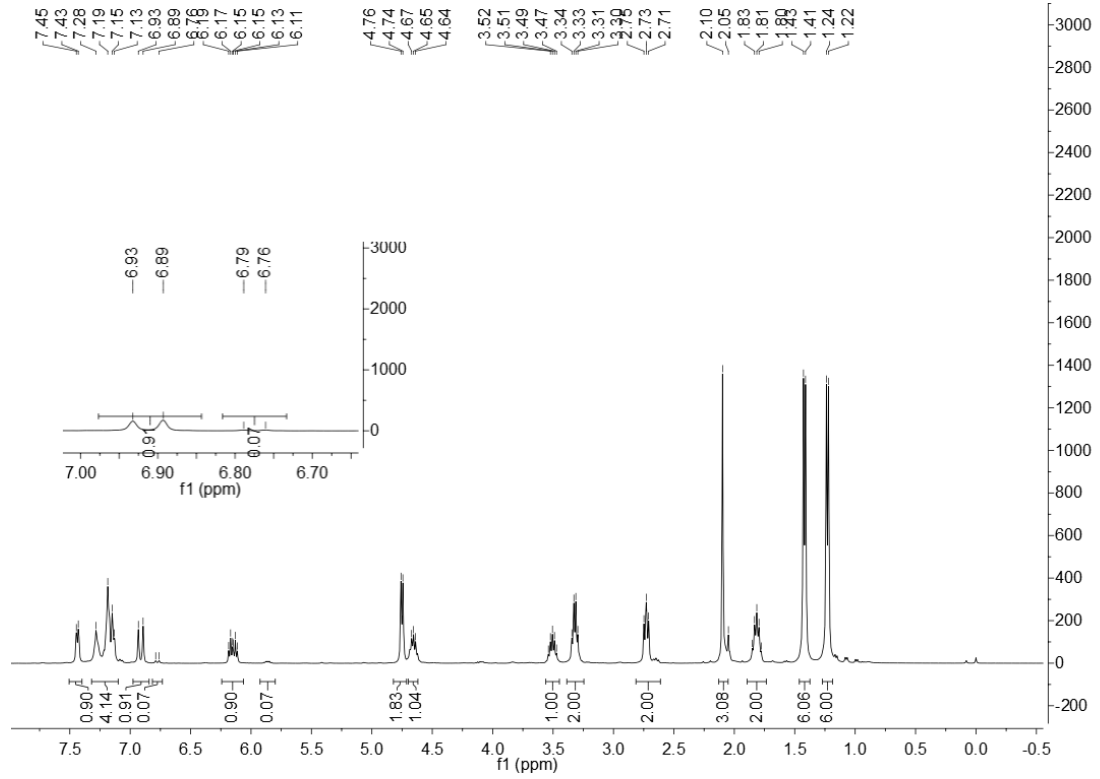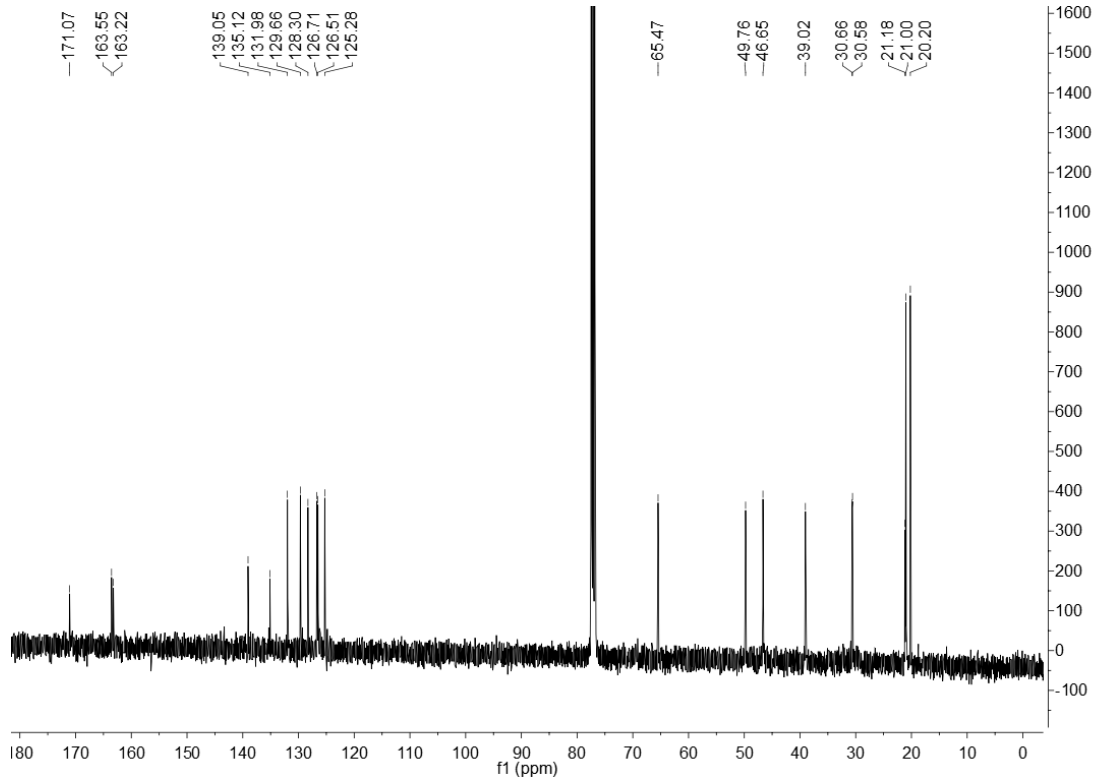

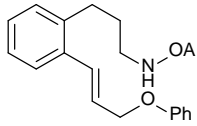

**3b**

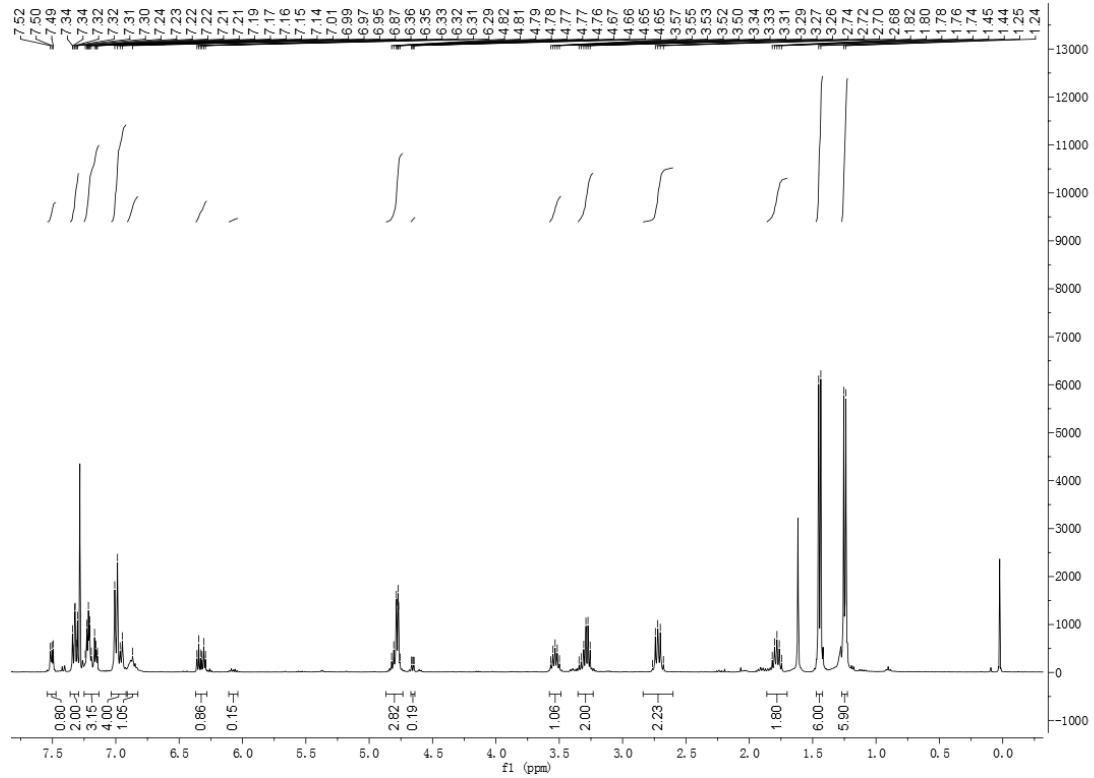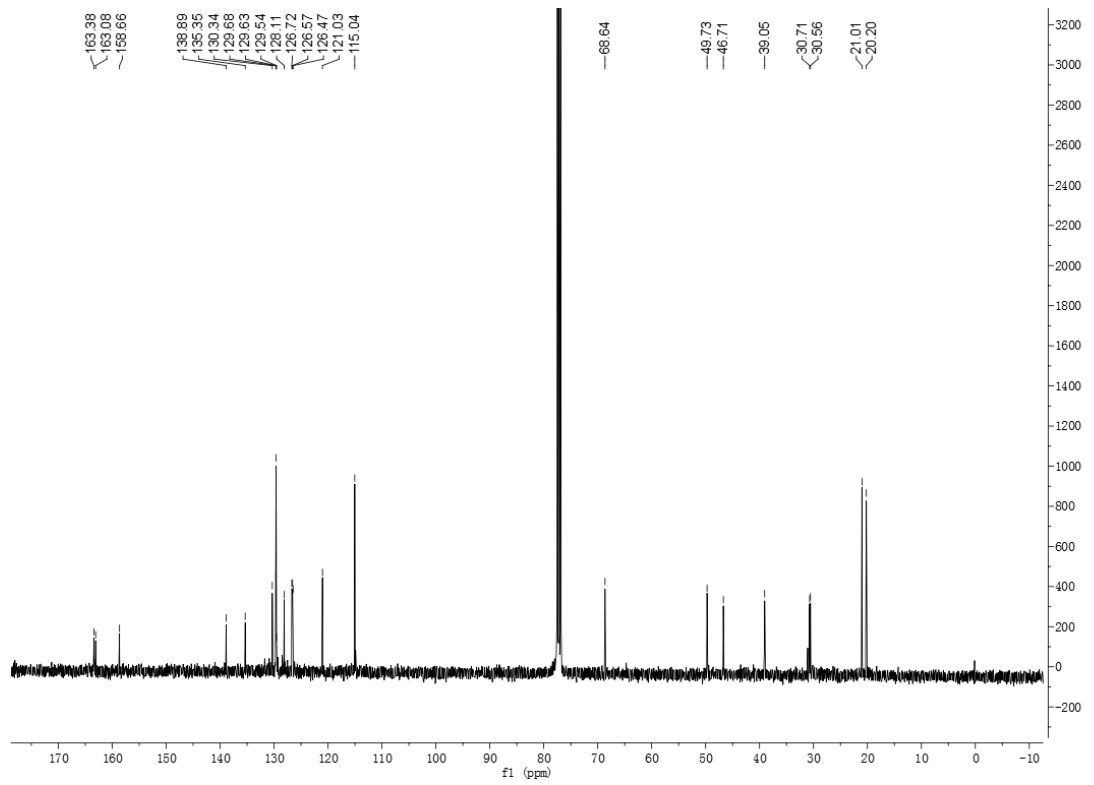

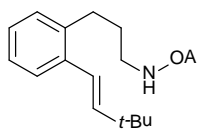

**3c**

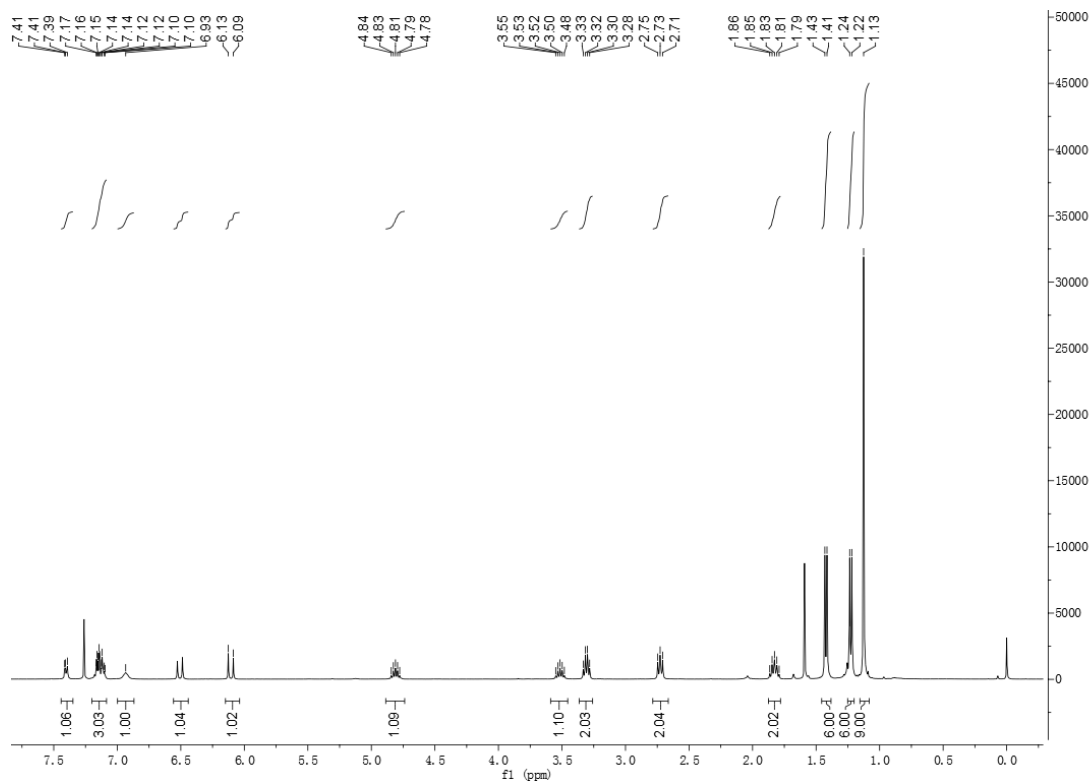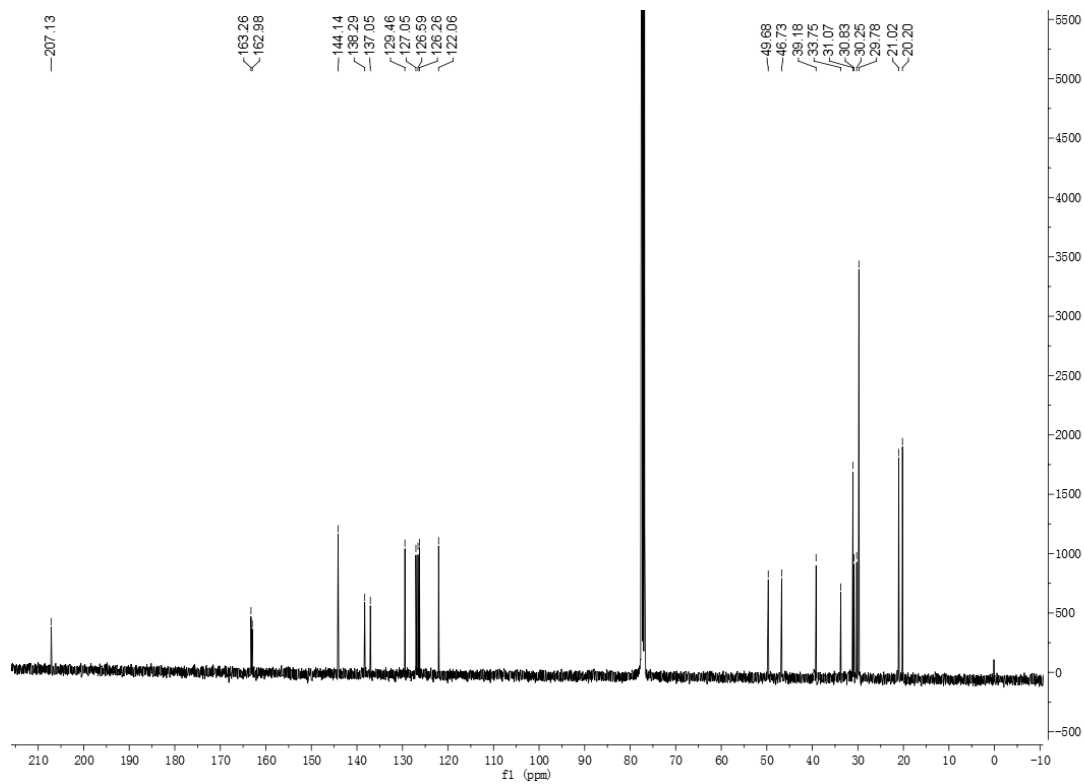

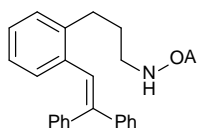

3d

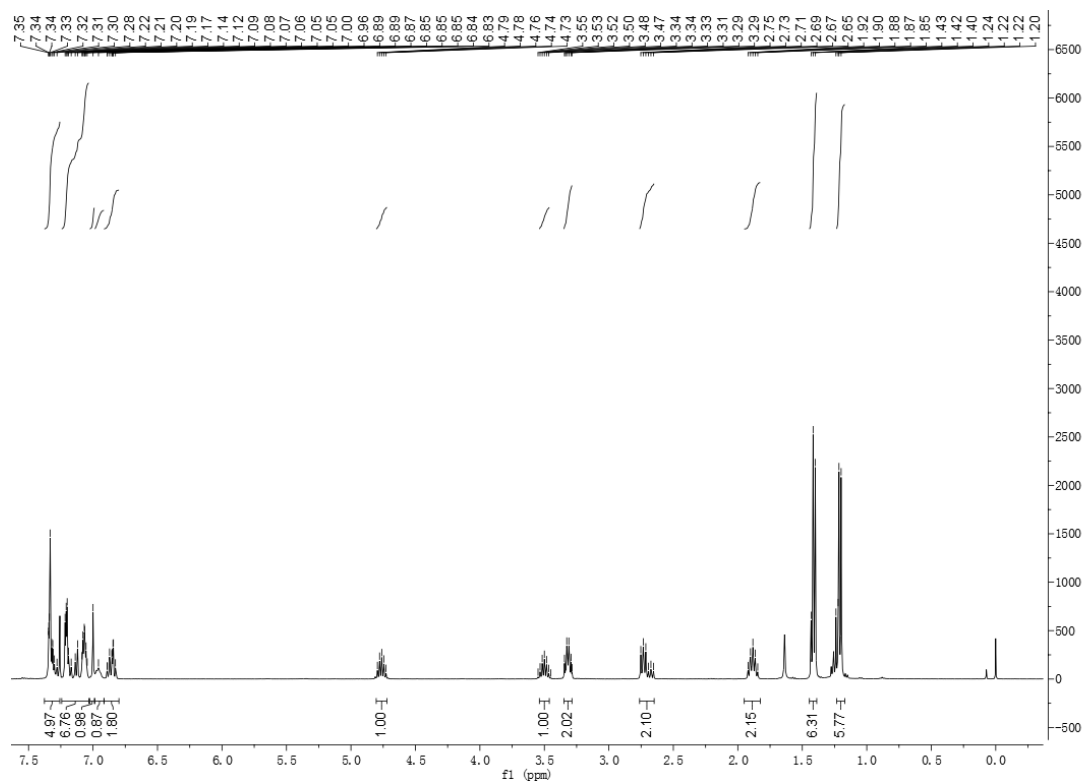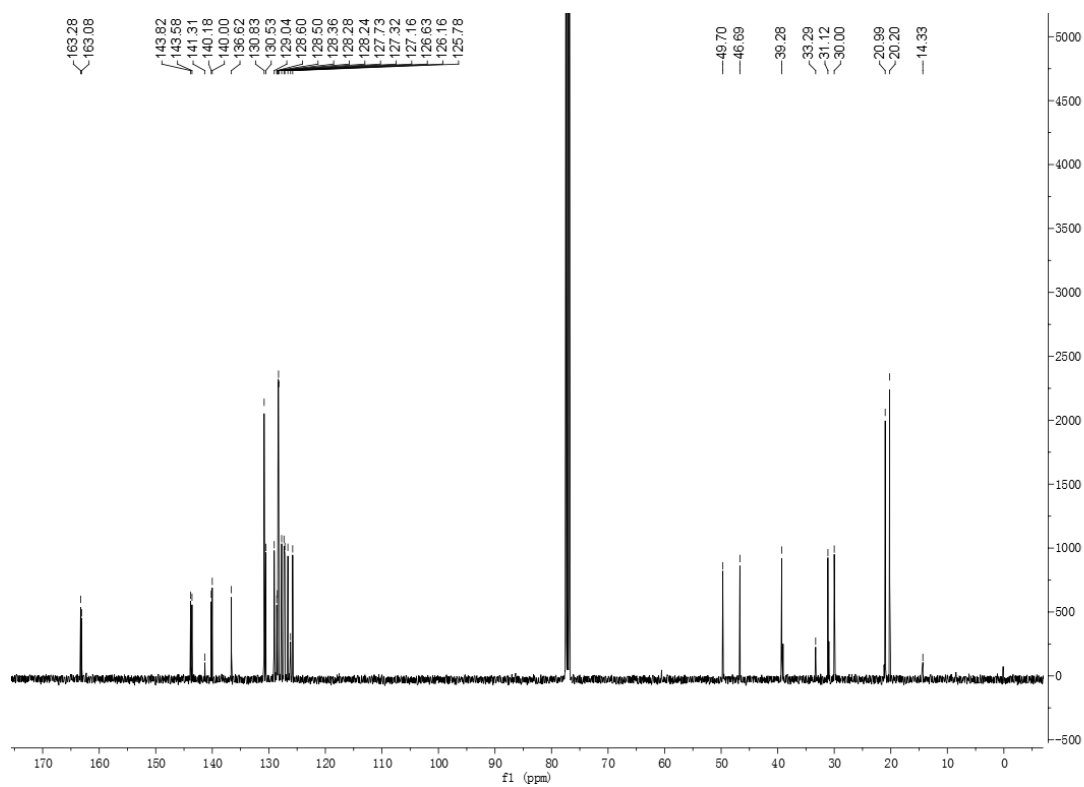

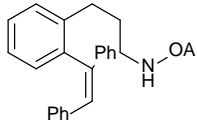

3e

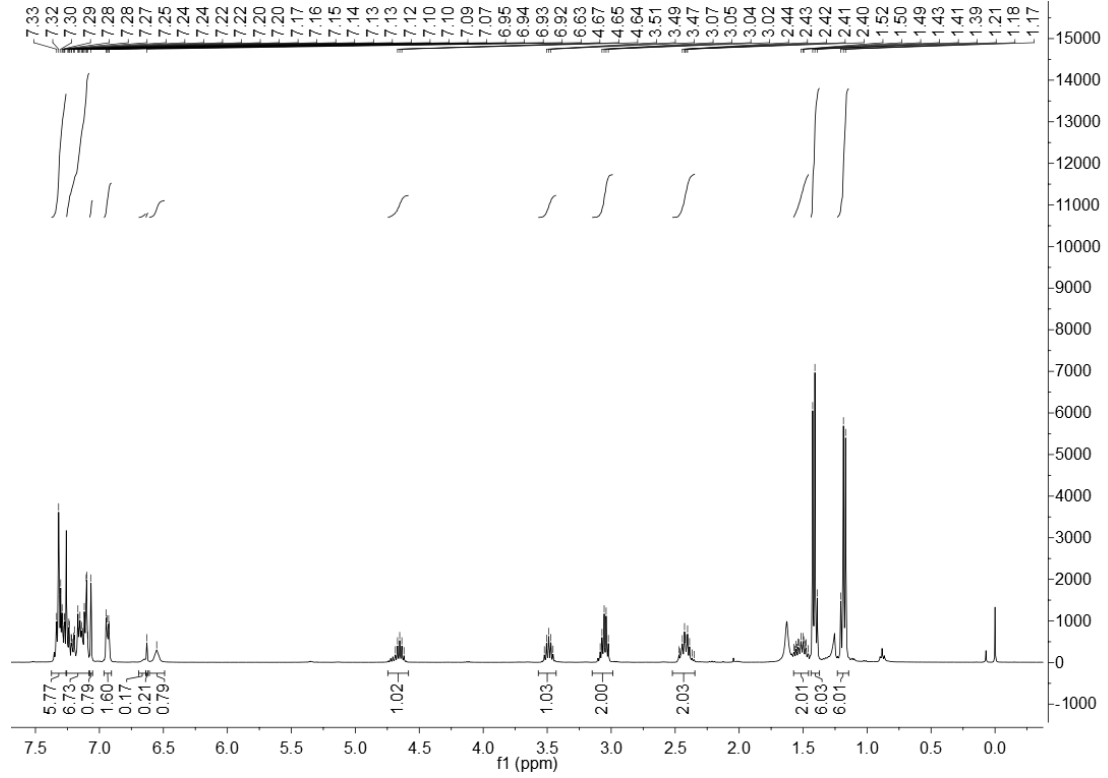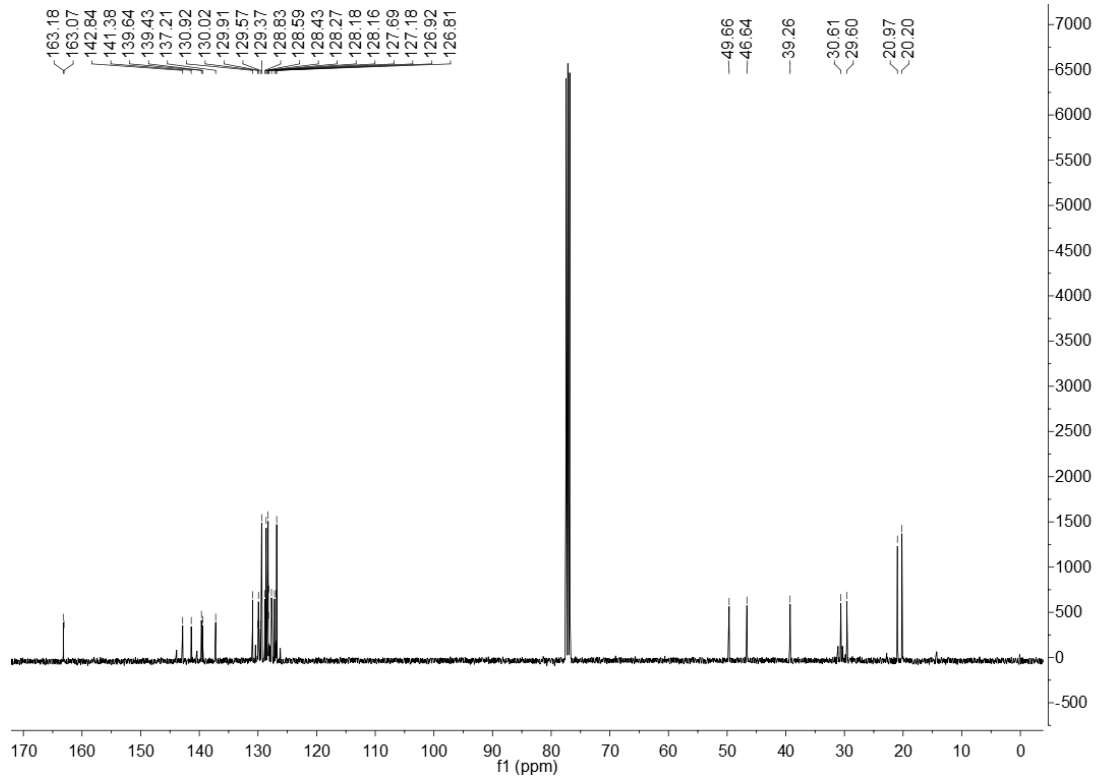

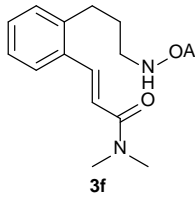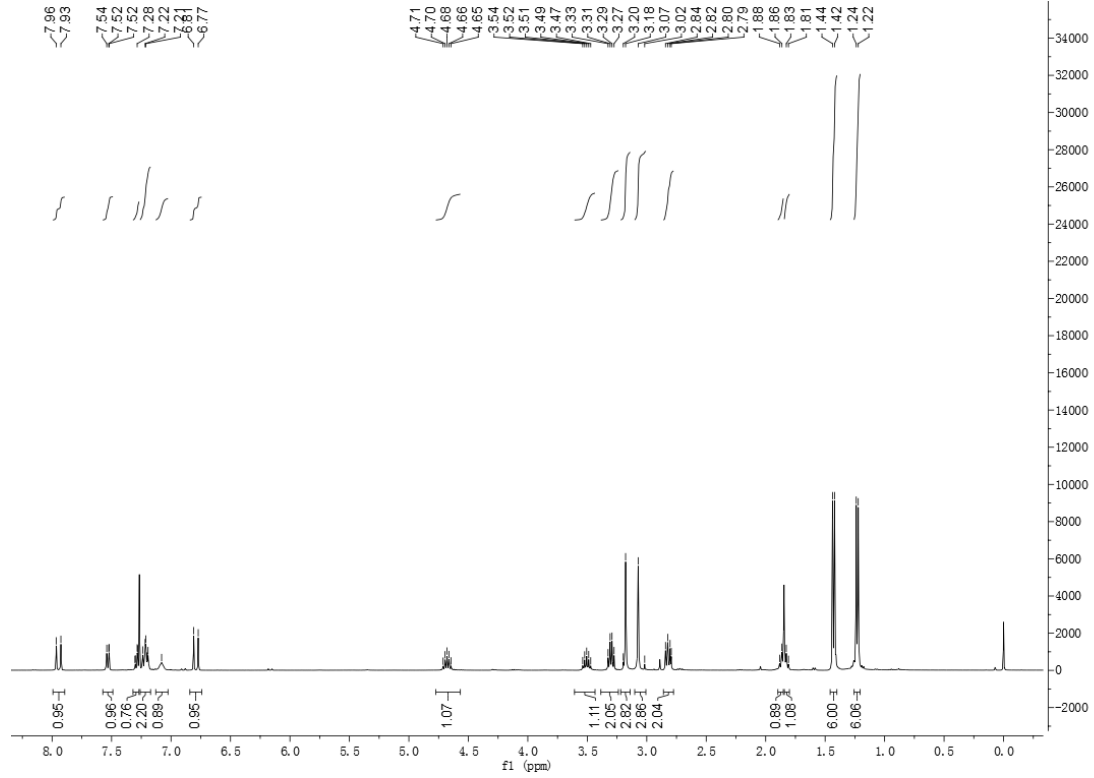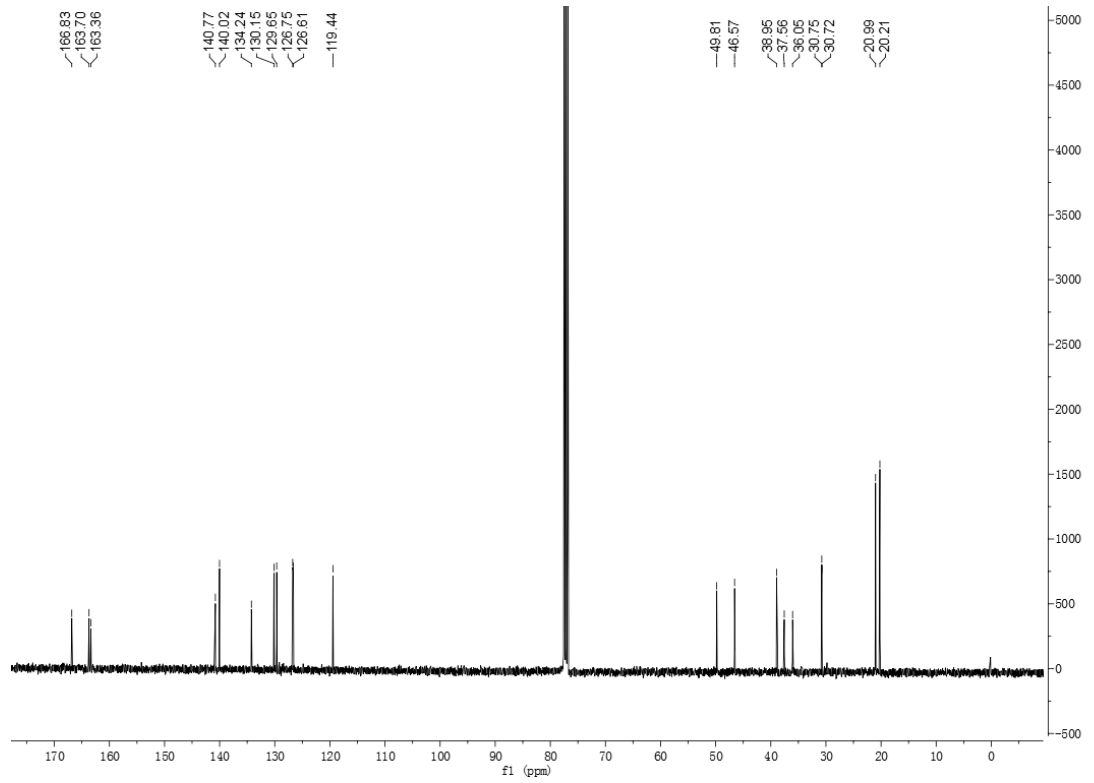

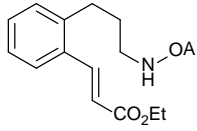

**3g**

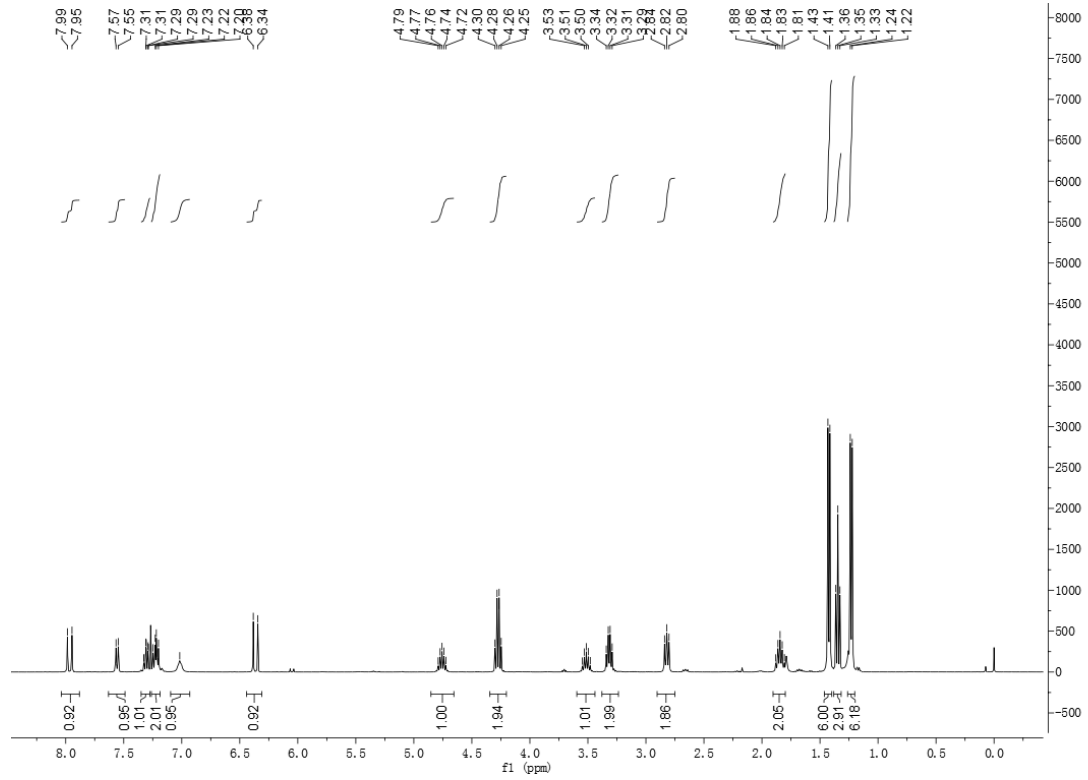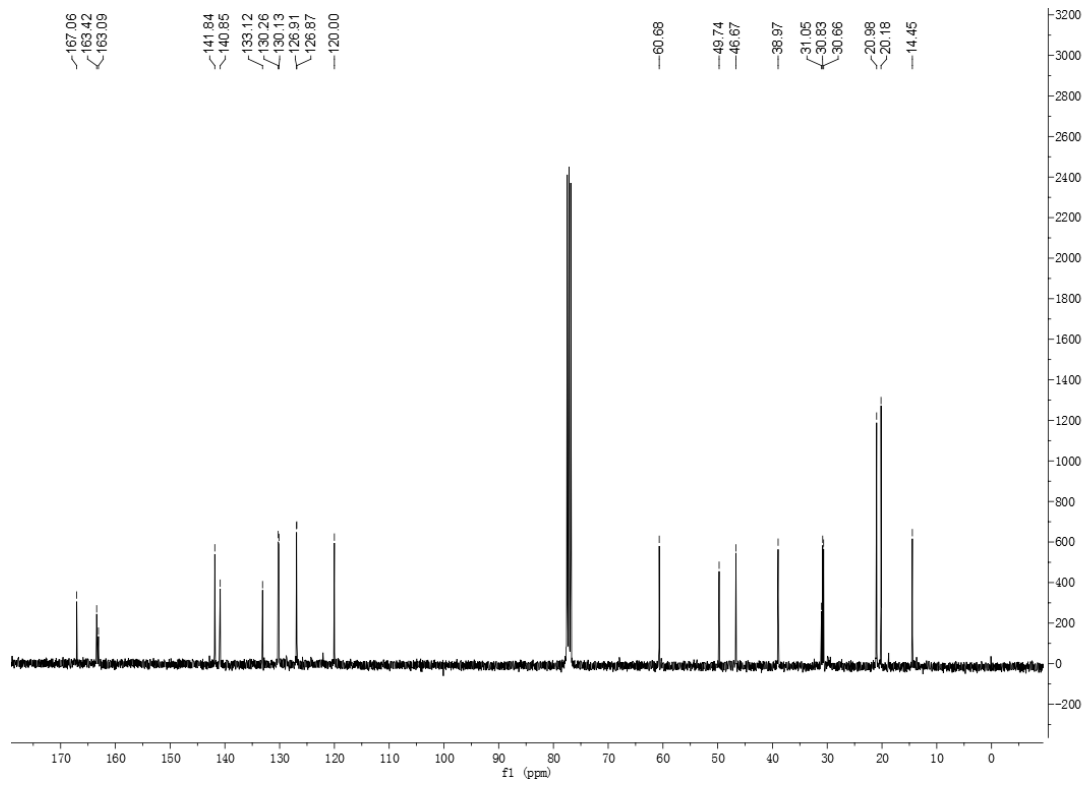



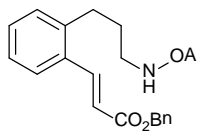

3h

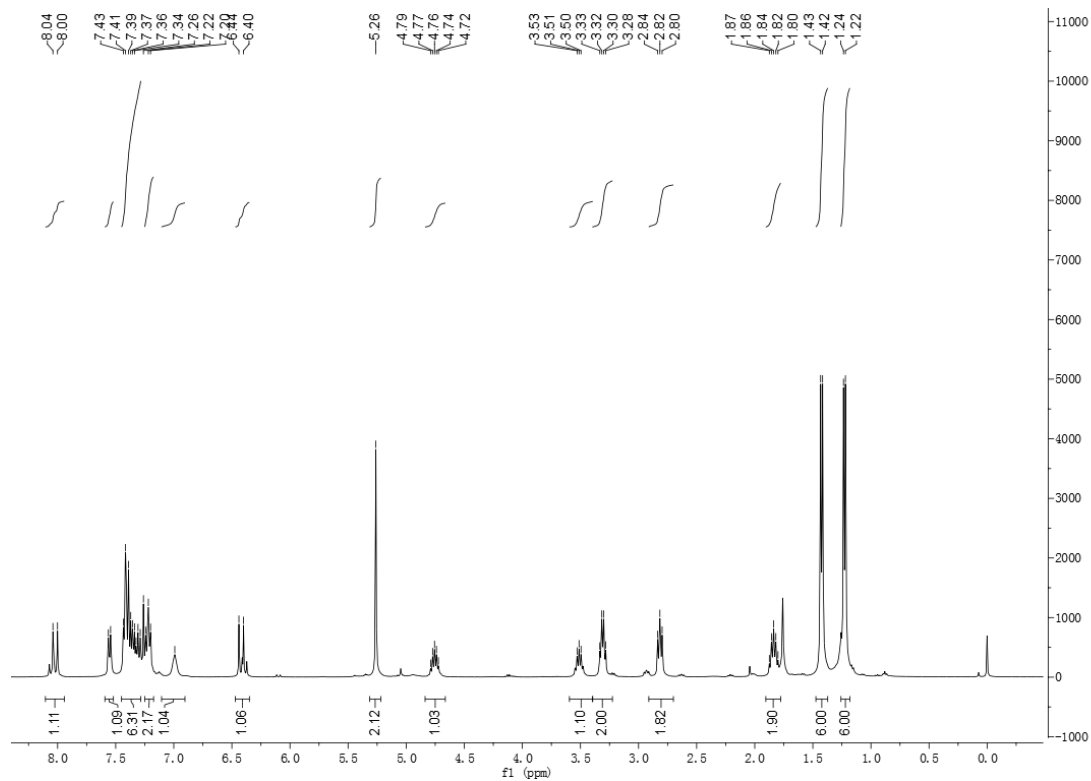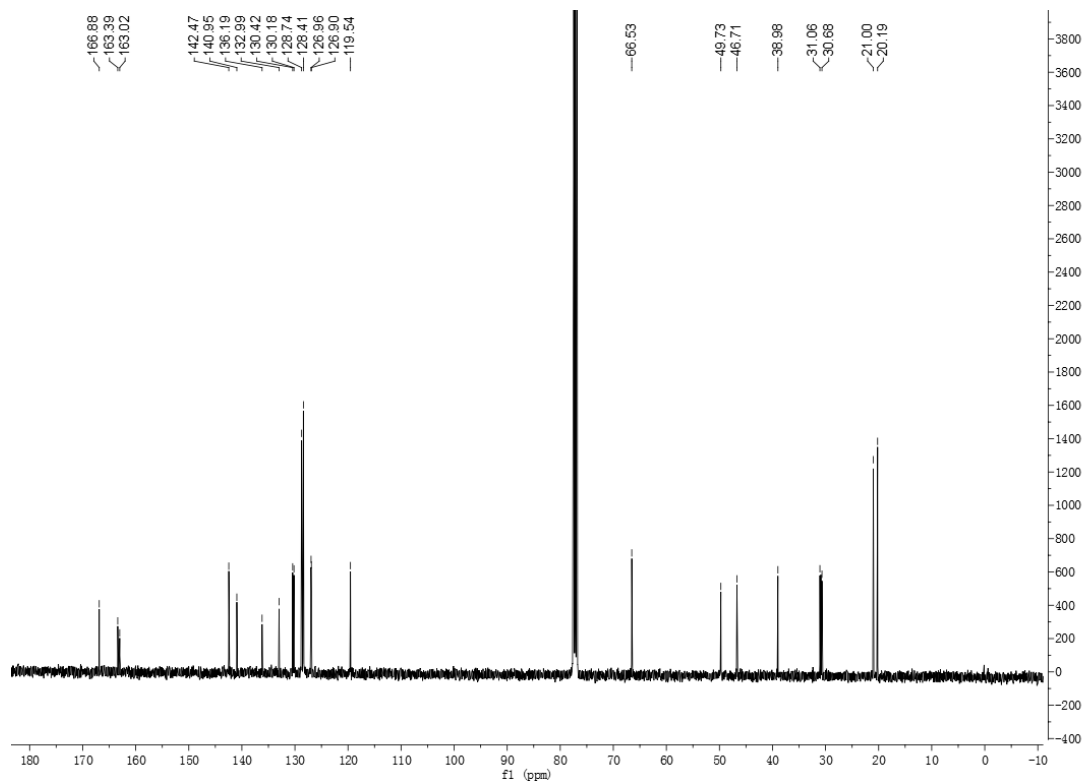

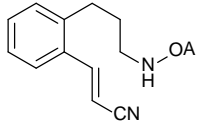

**3i**

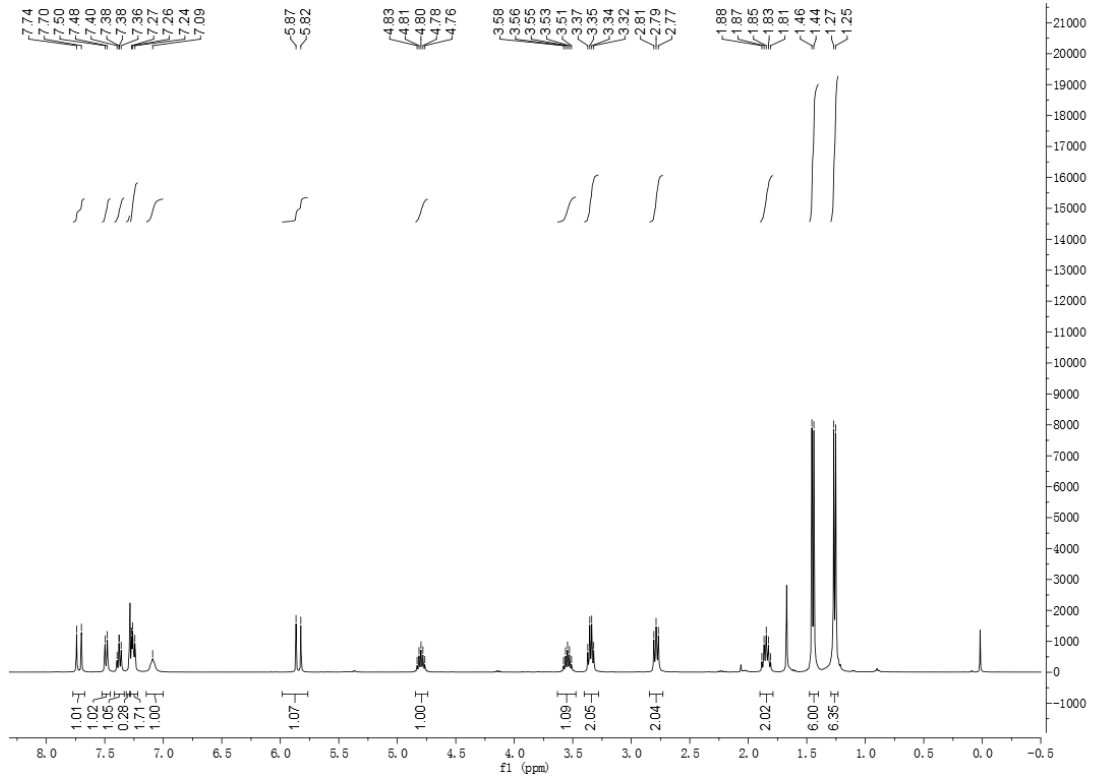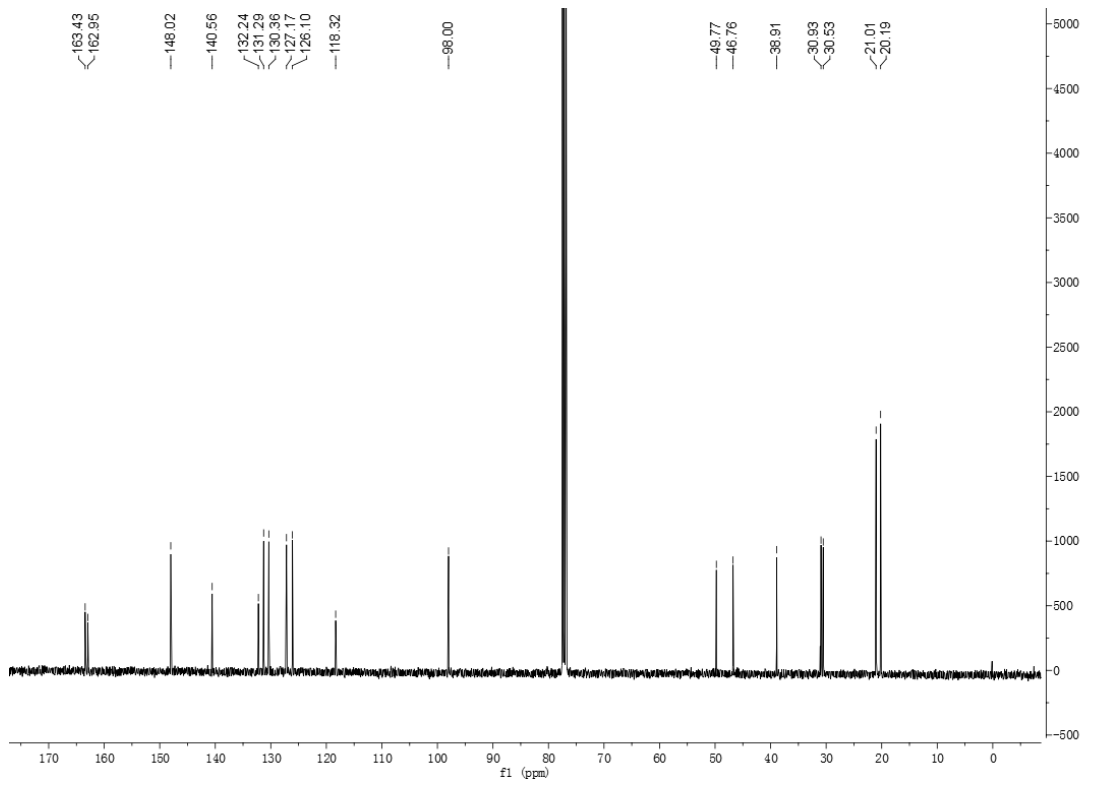

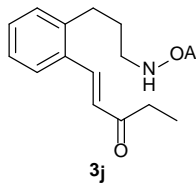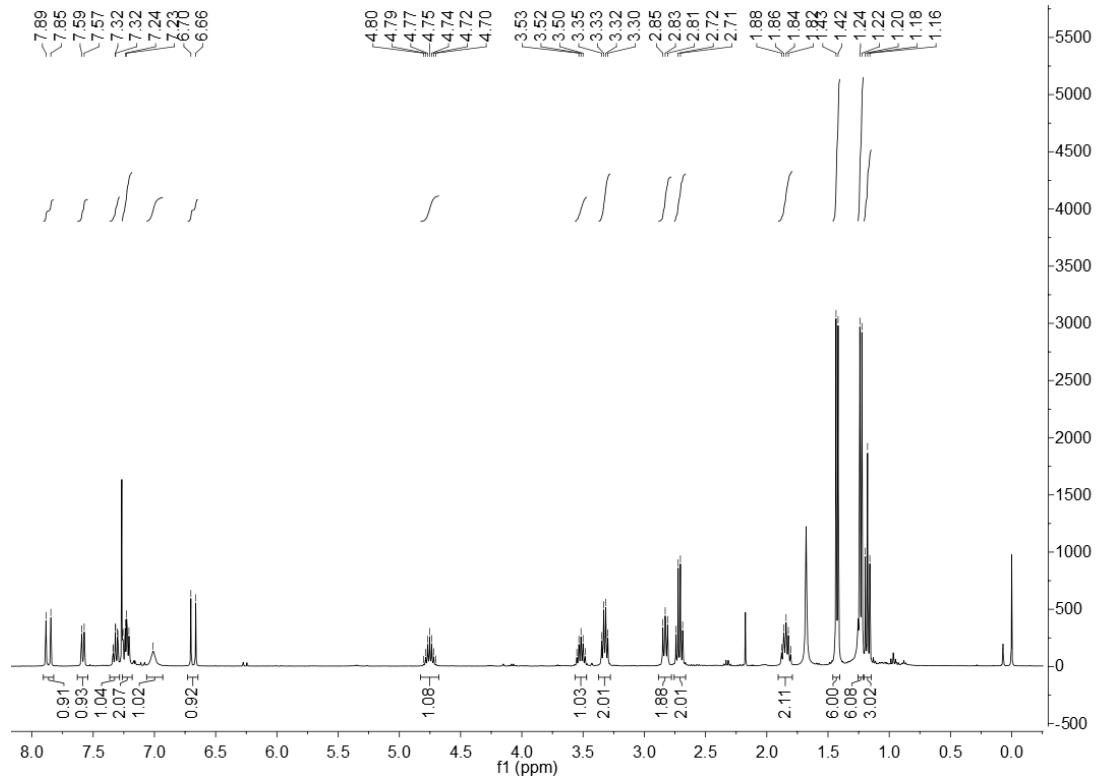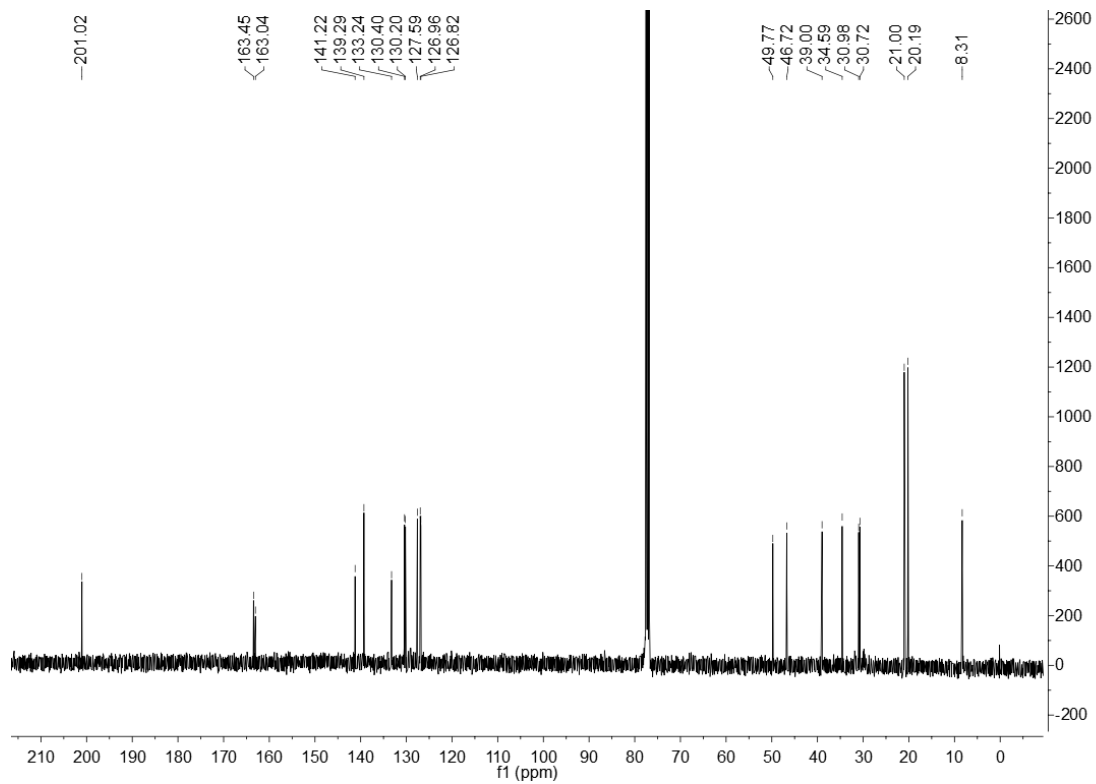

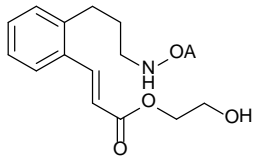

3k

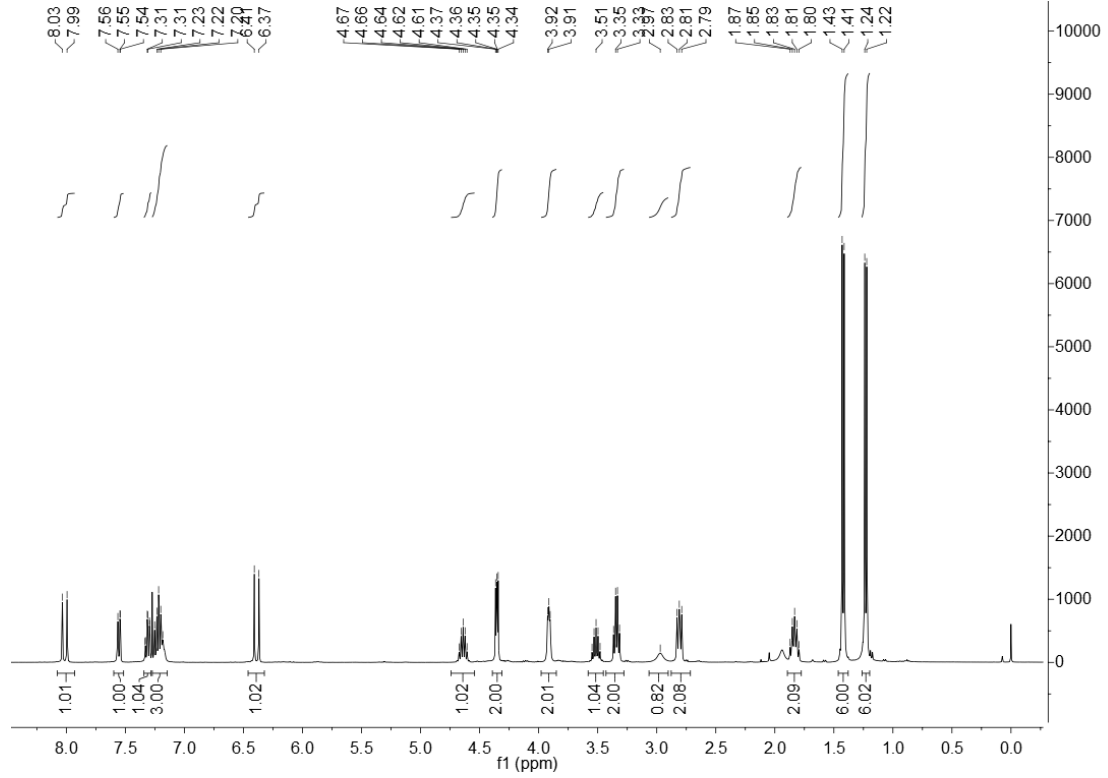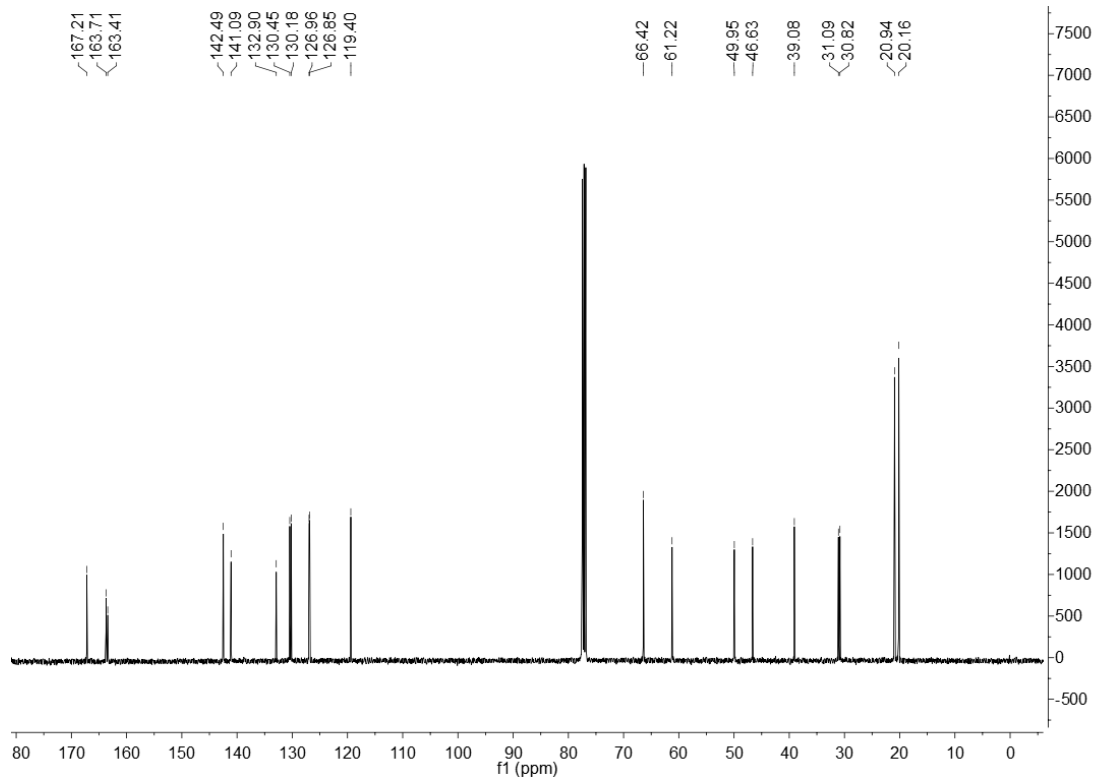

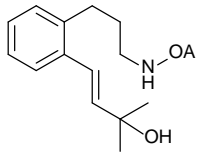

31

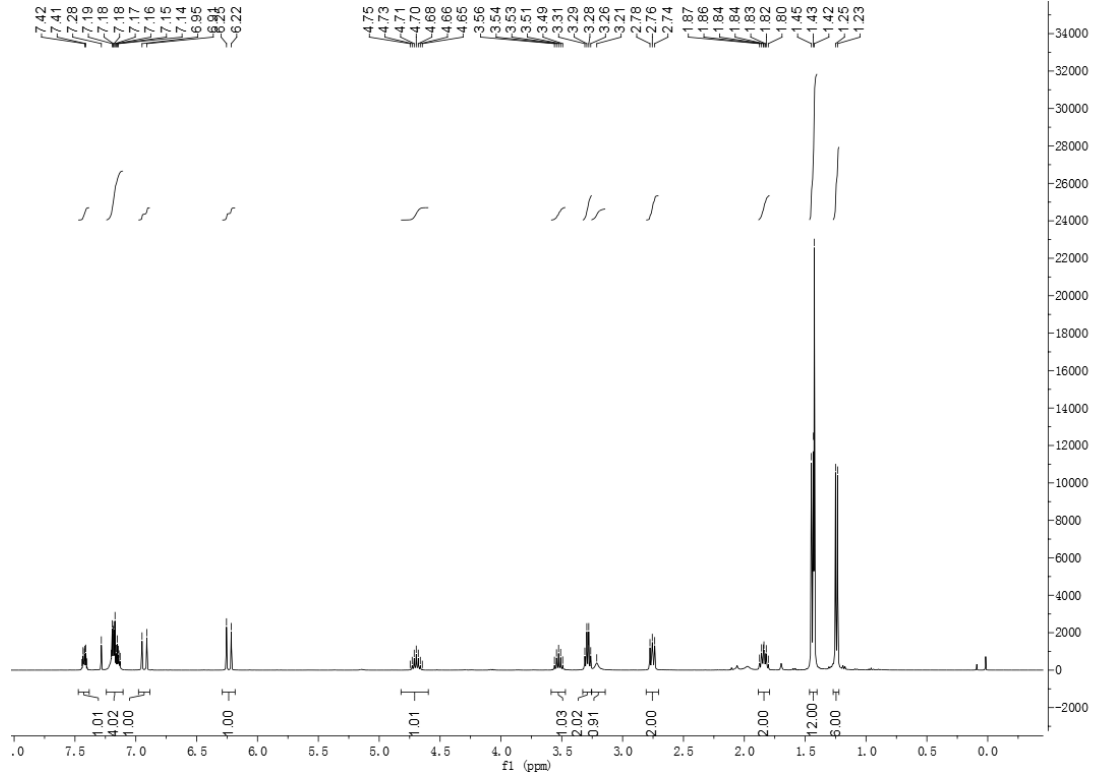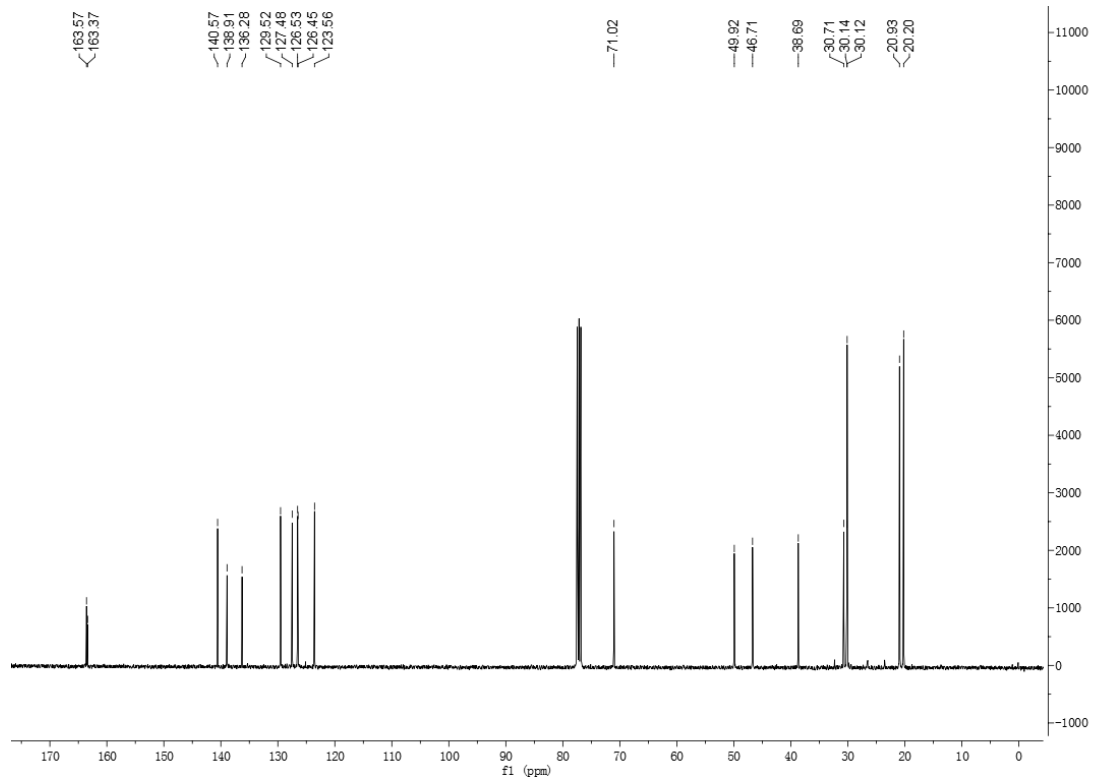

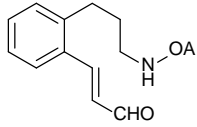

**3m**

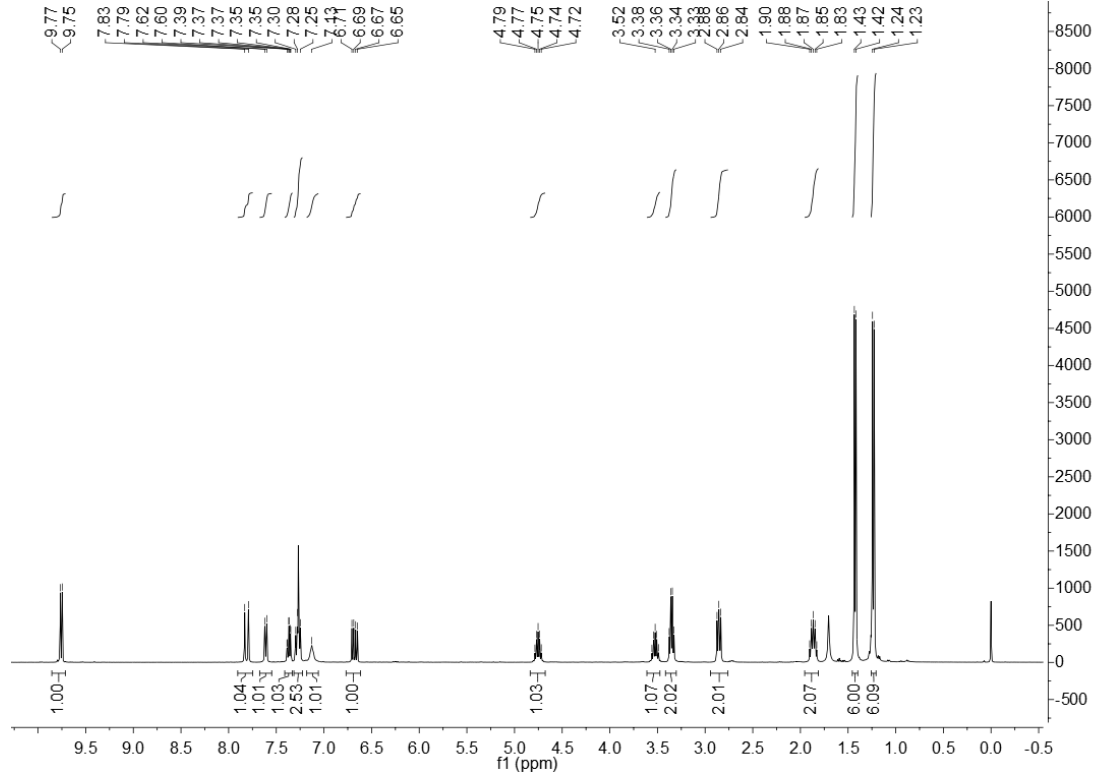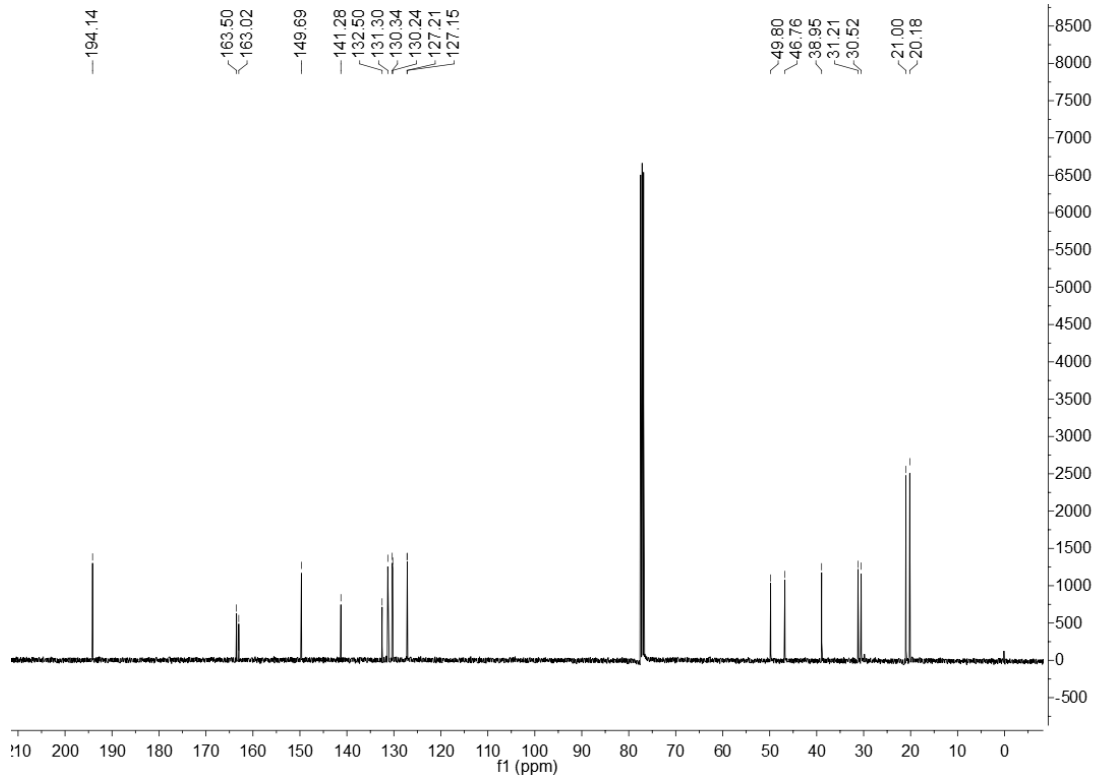

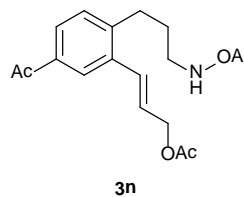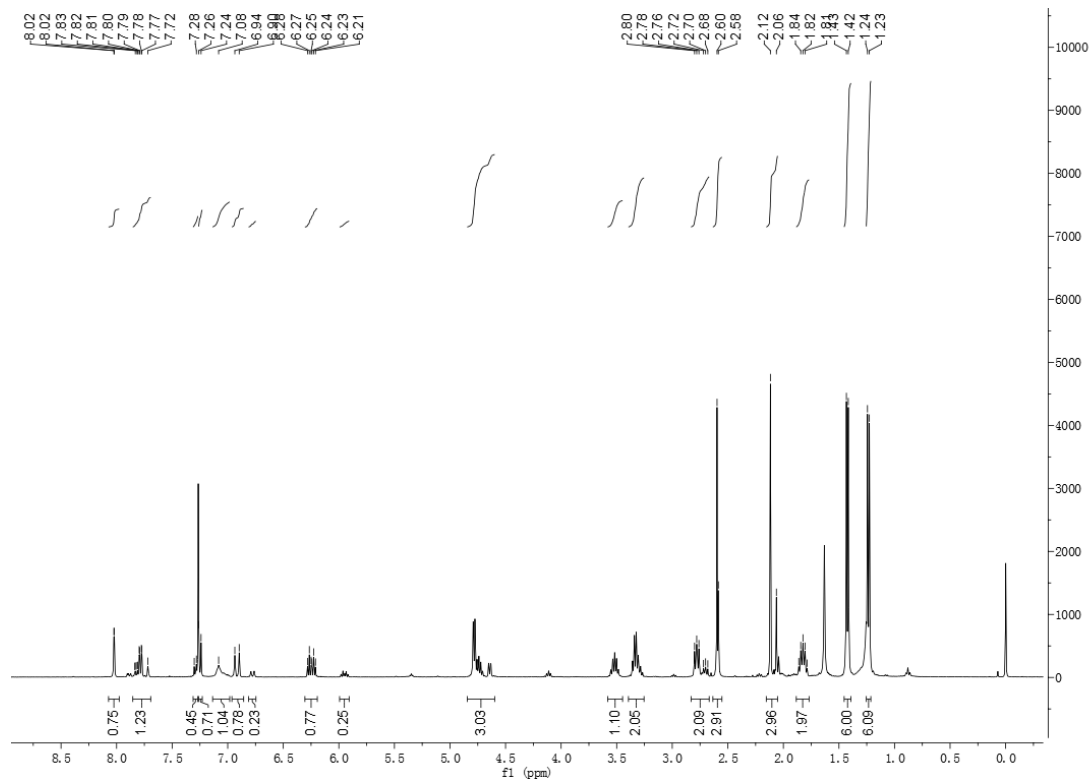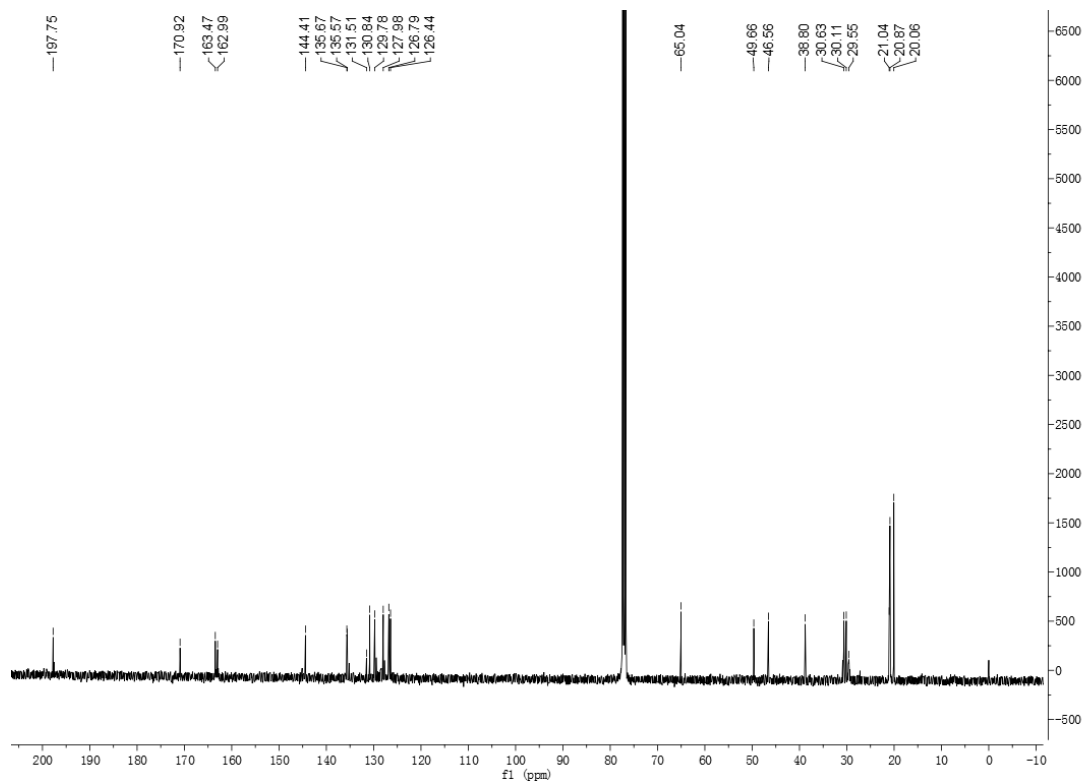

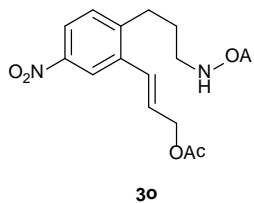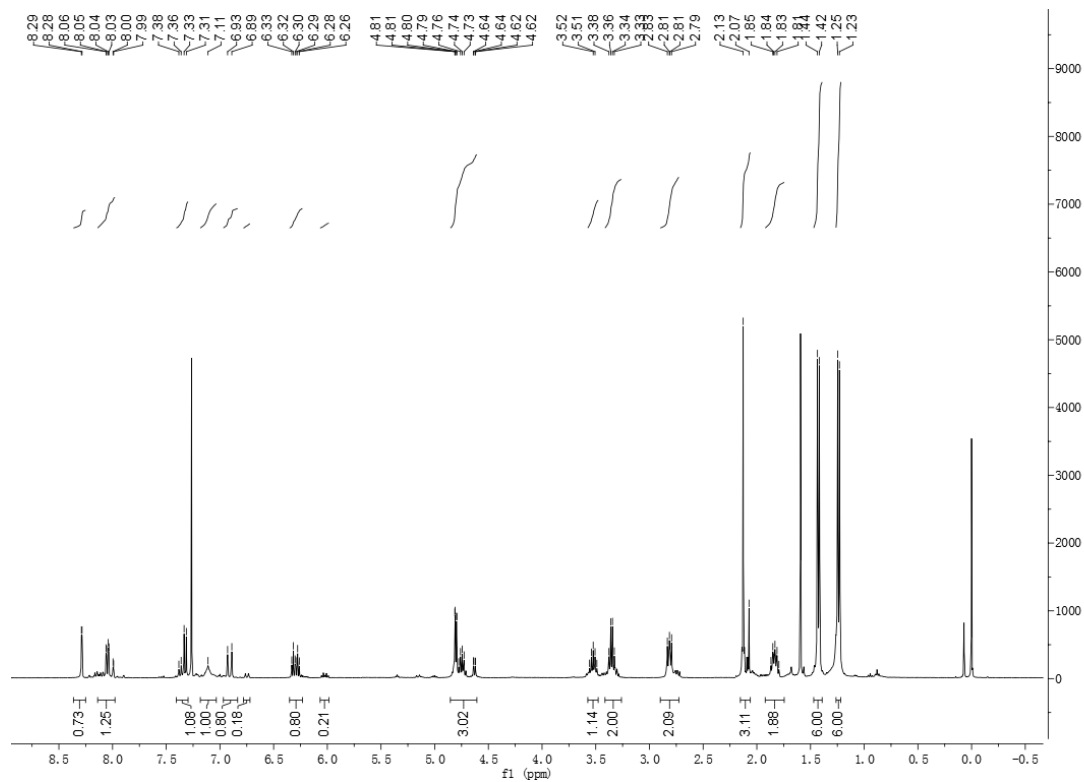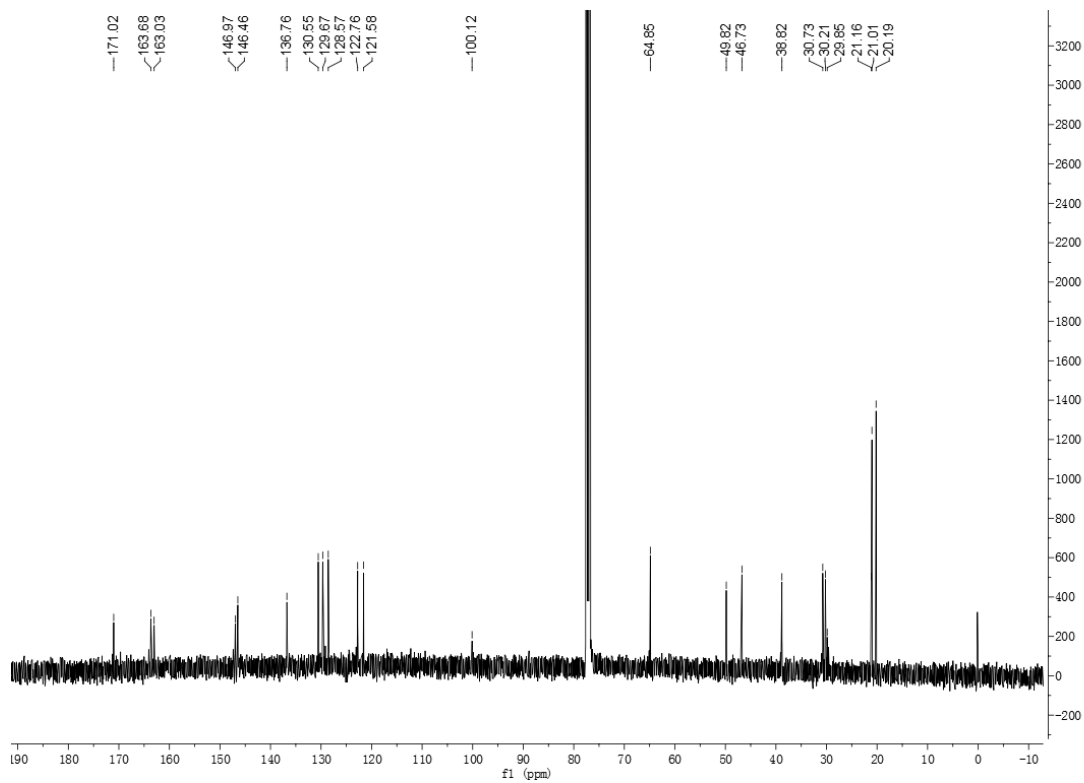



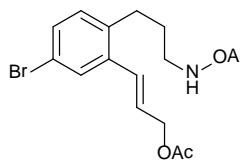

**3p**

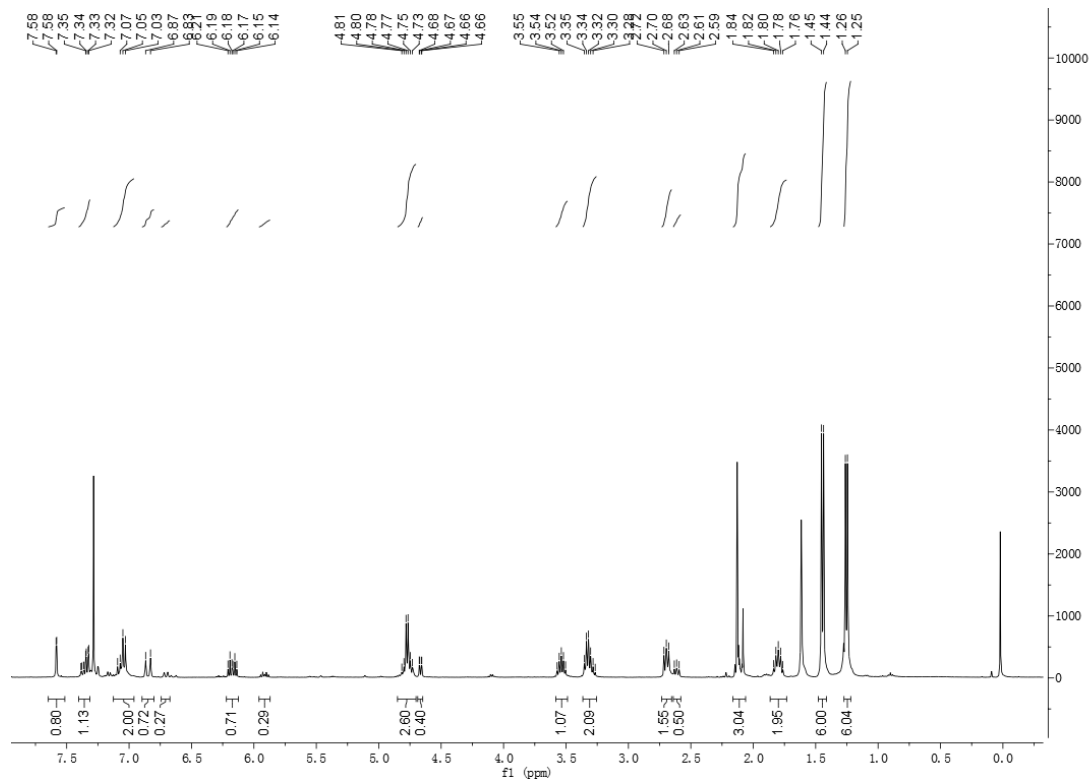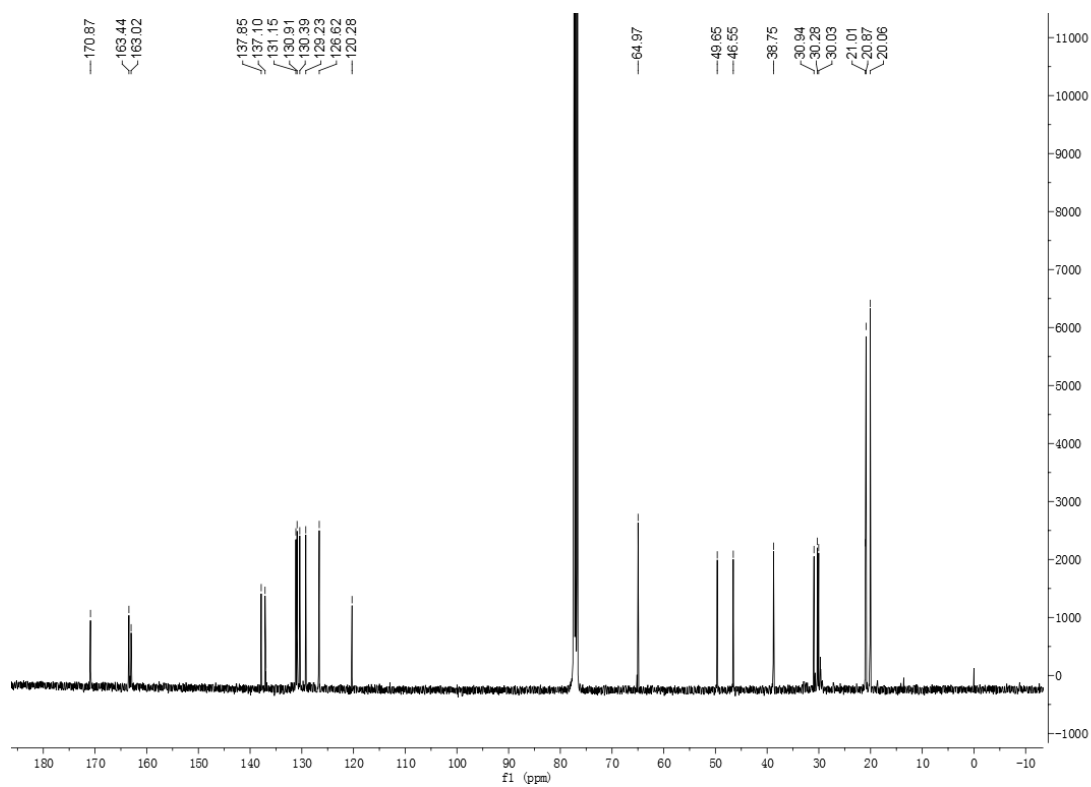

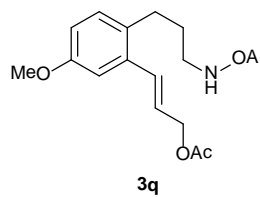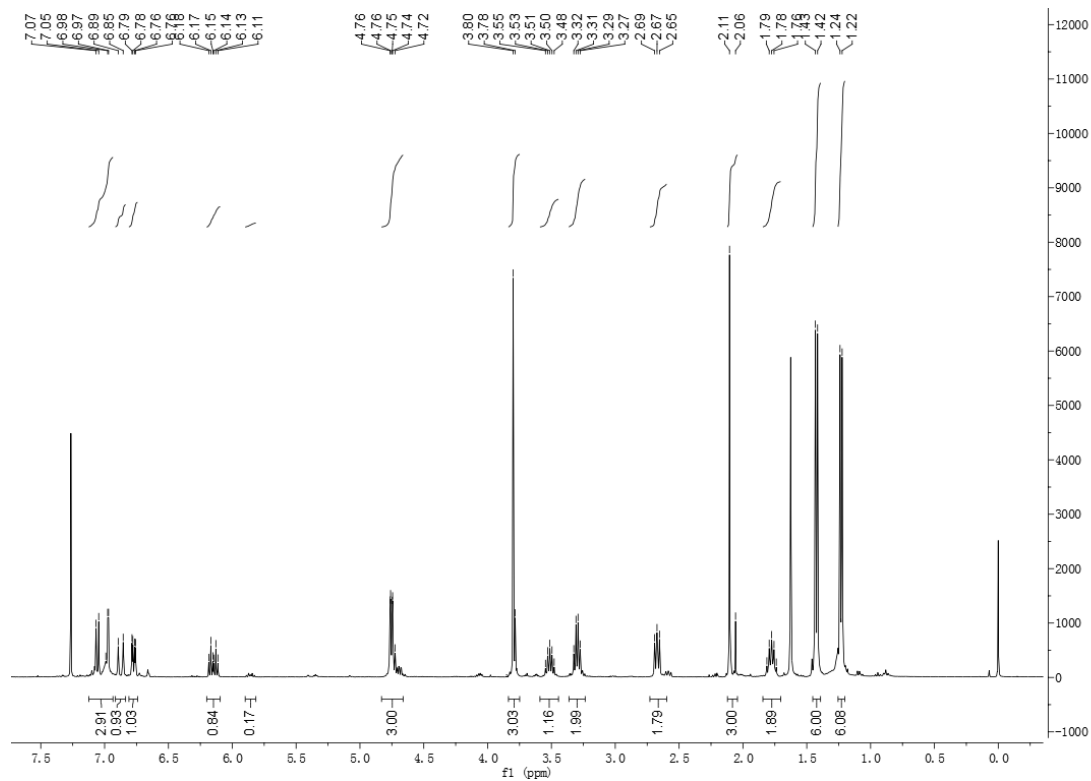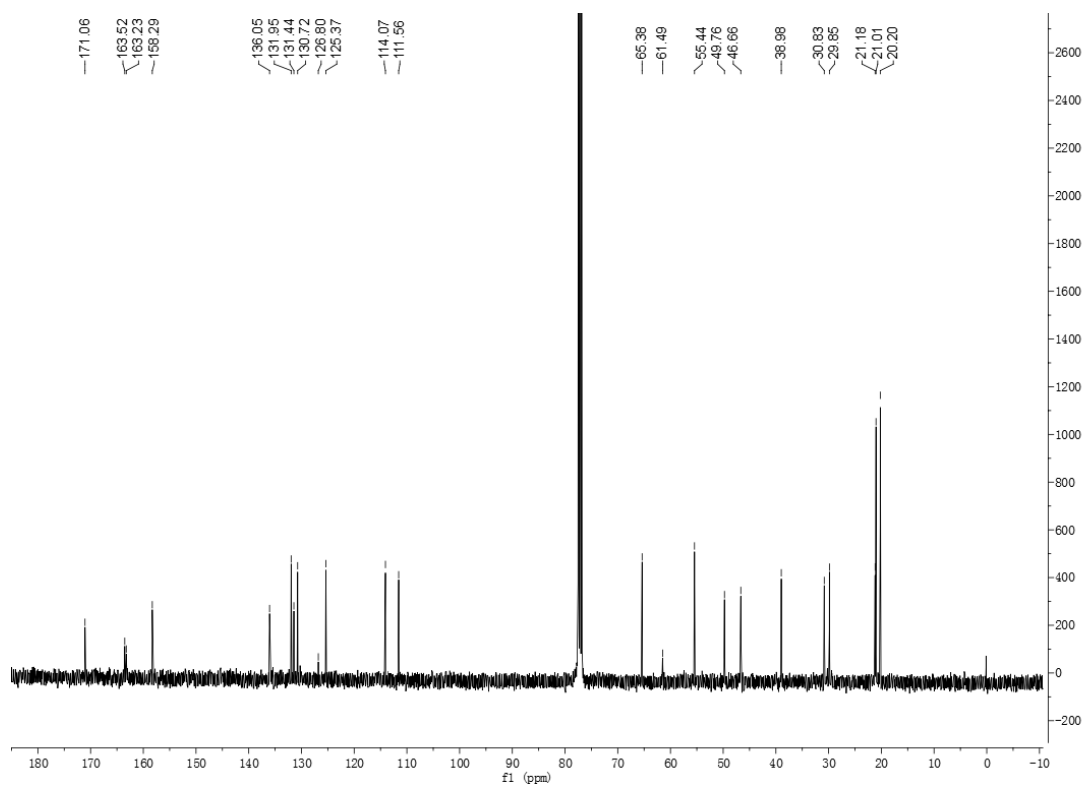

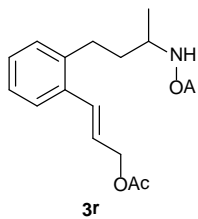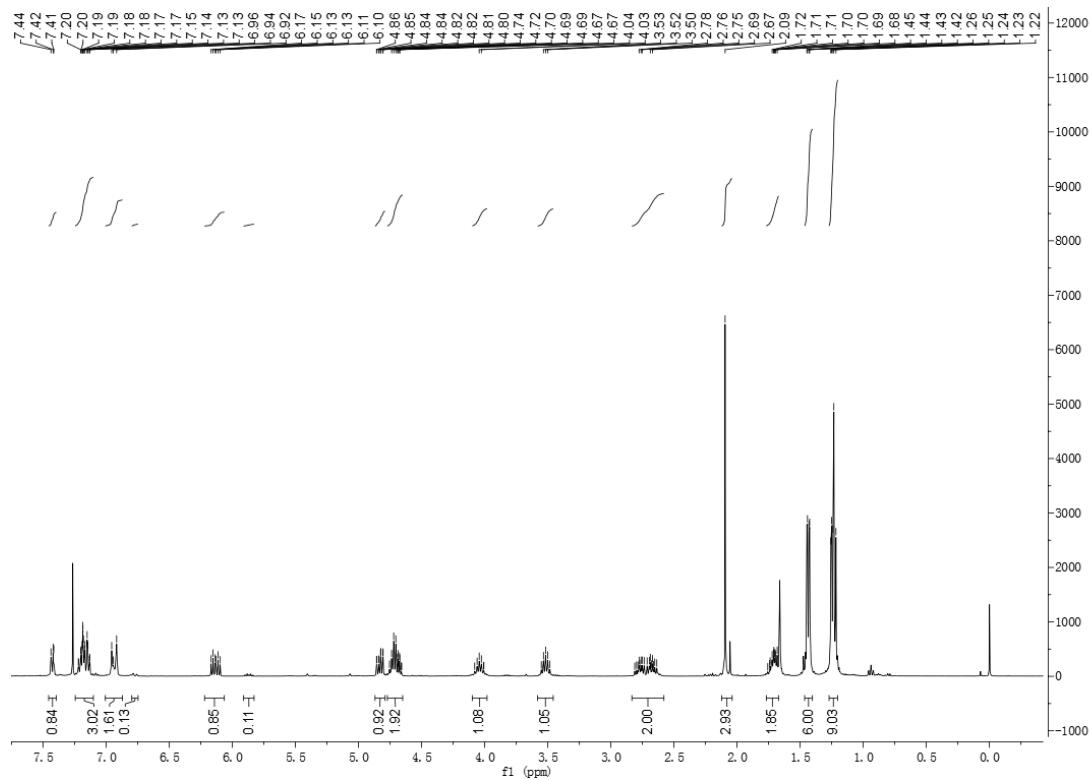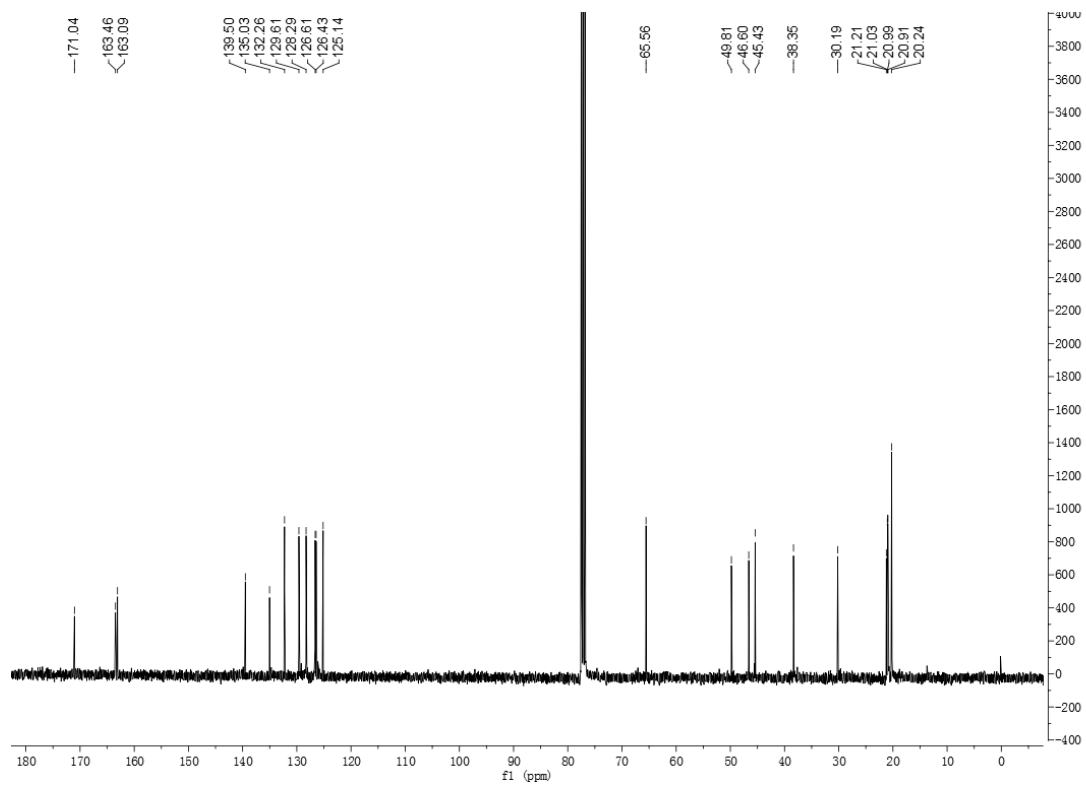

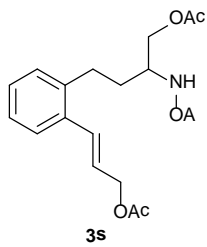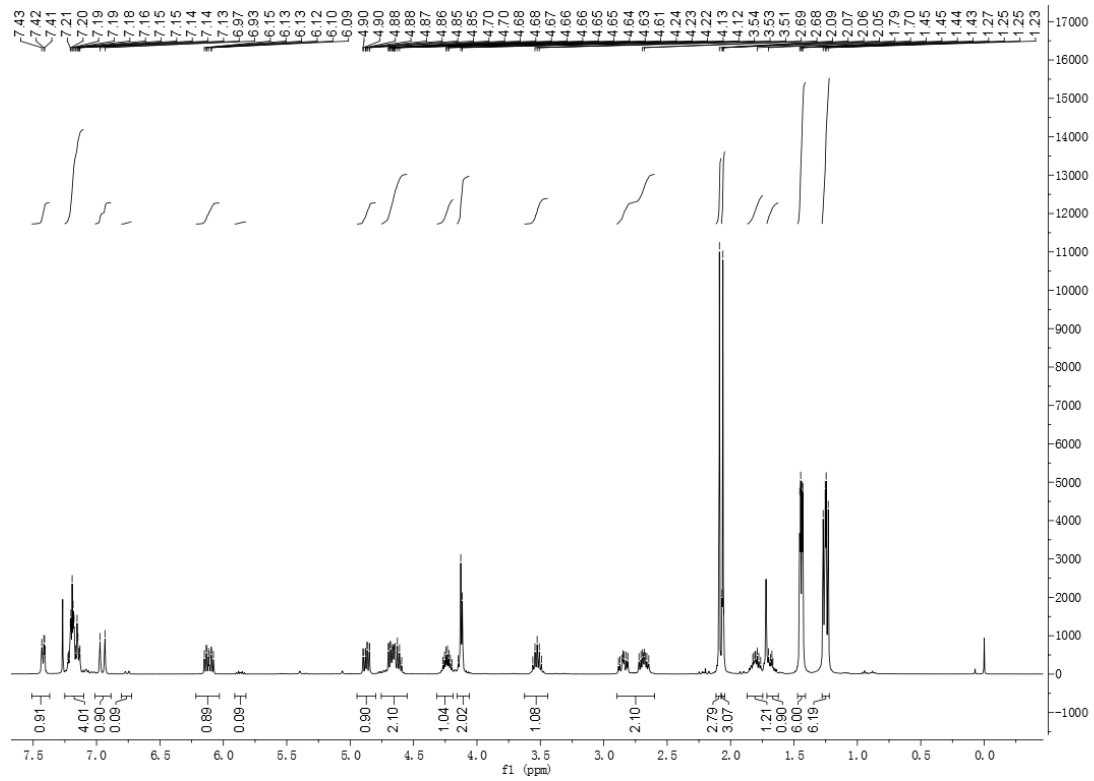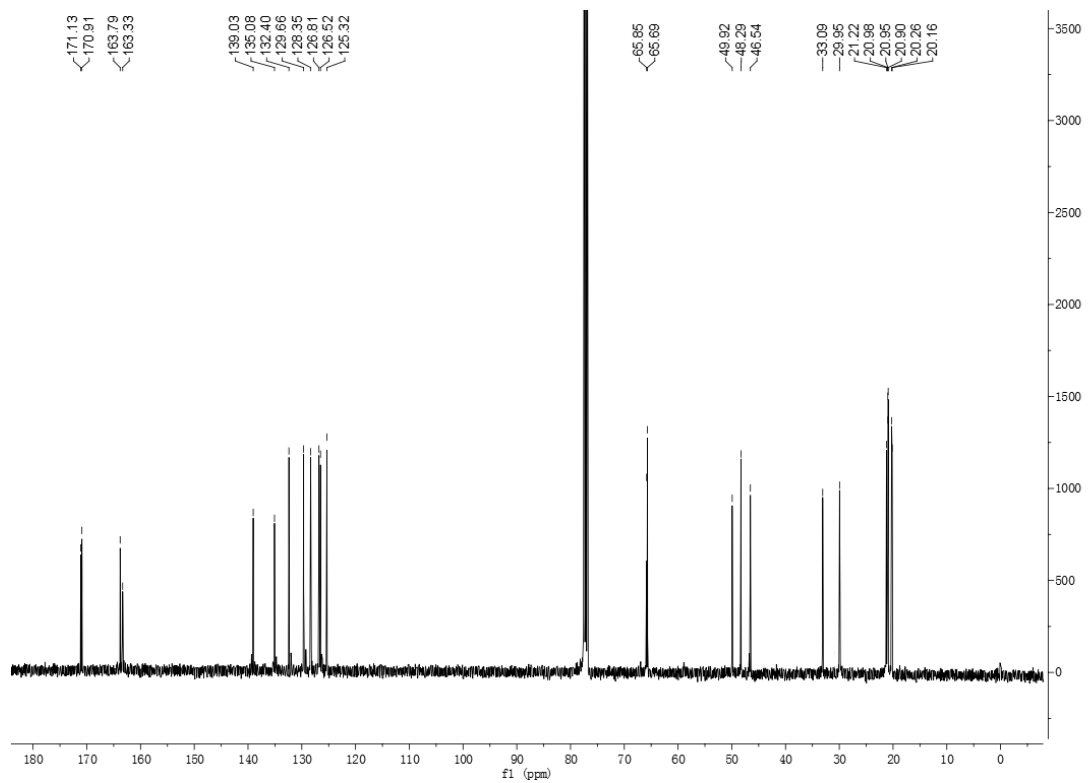

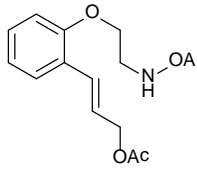

3t

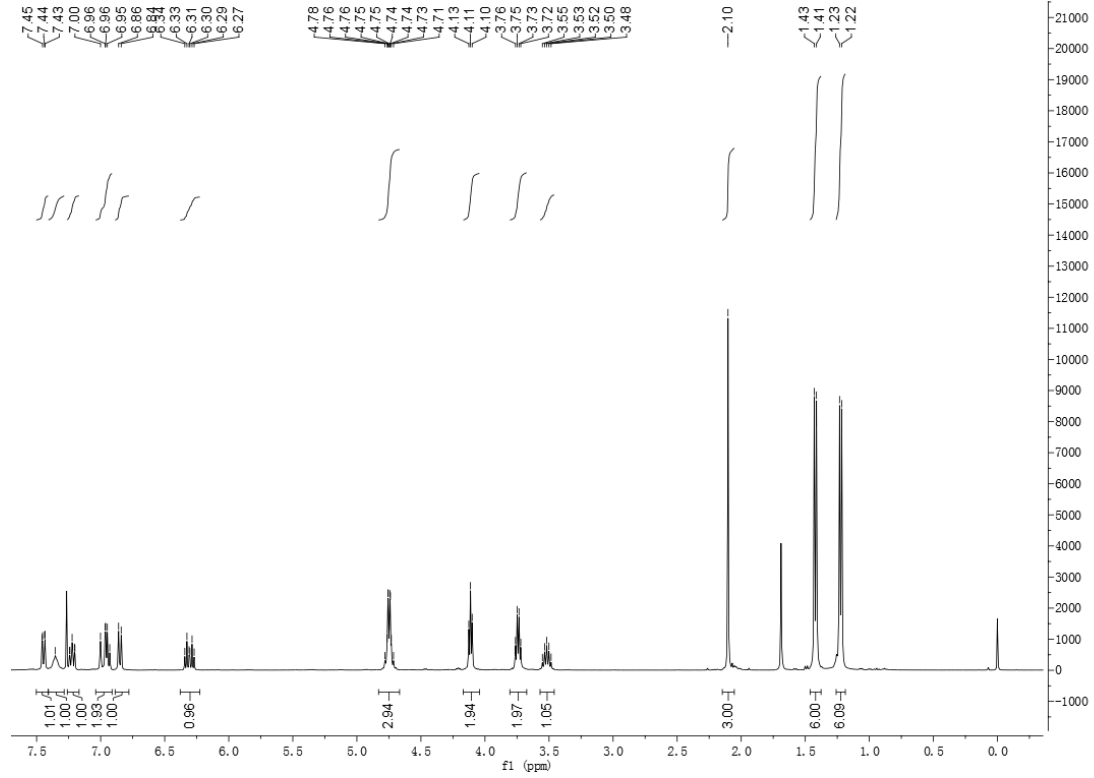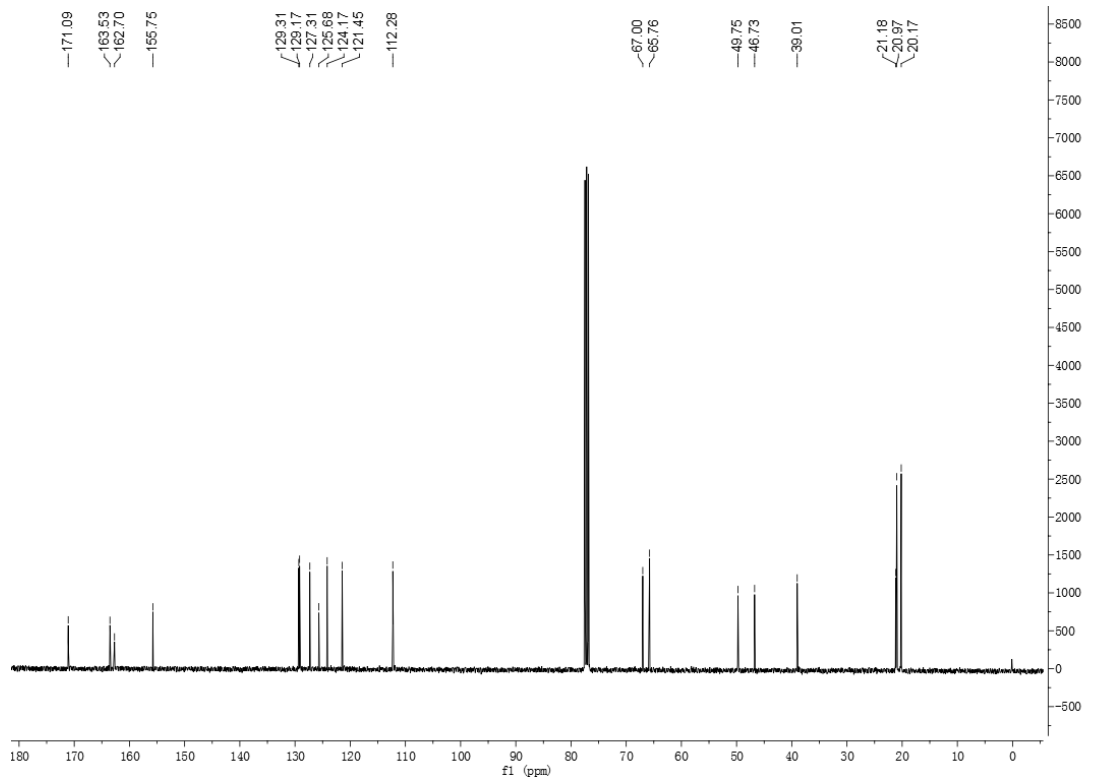

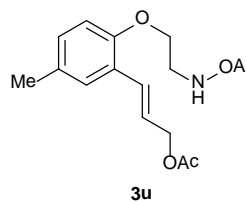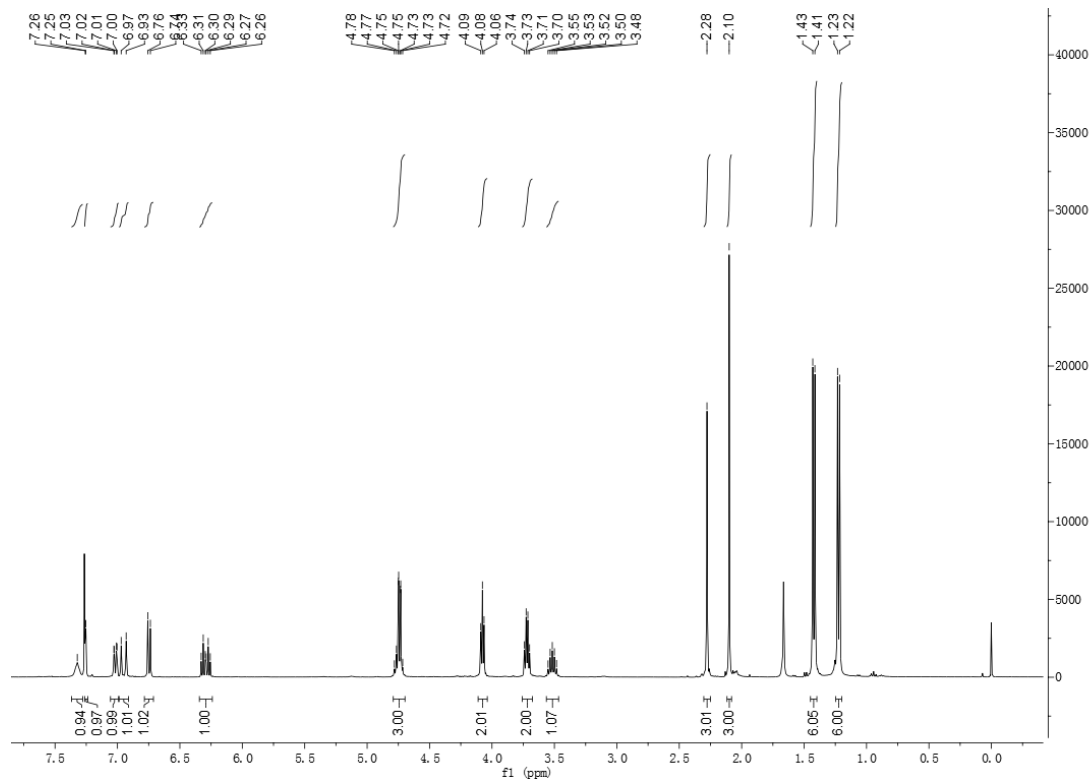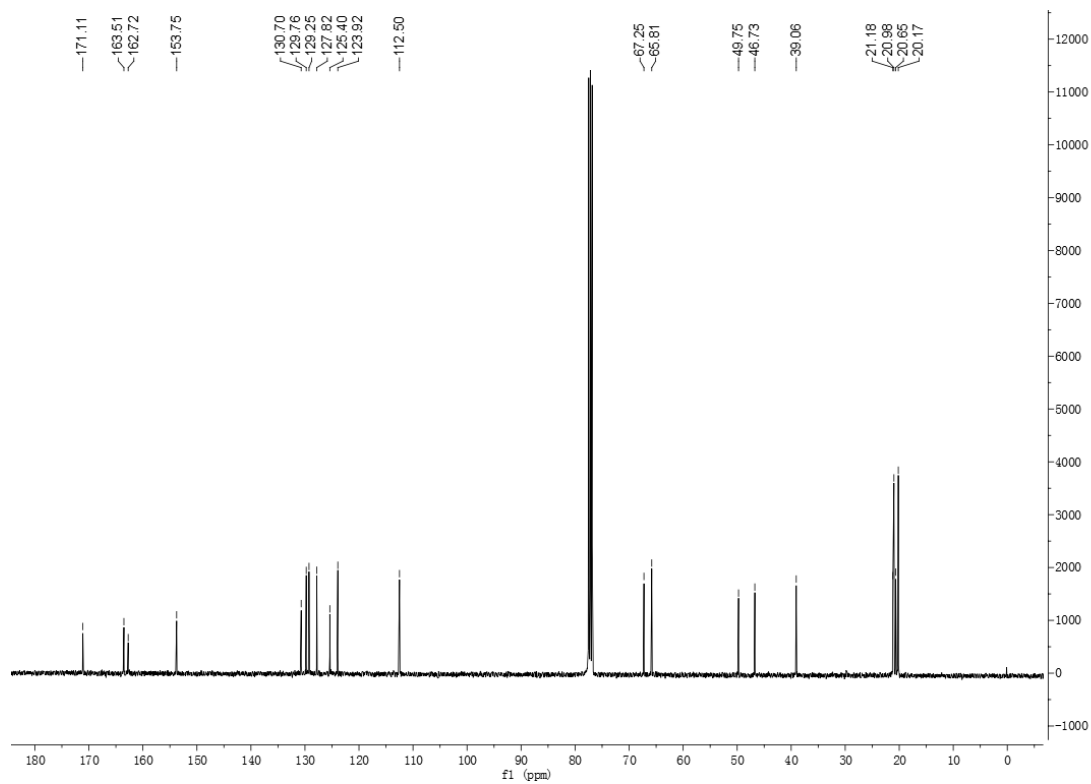

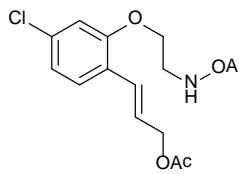

**3v**

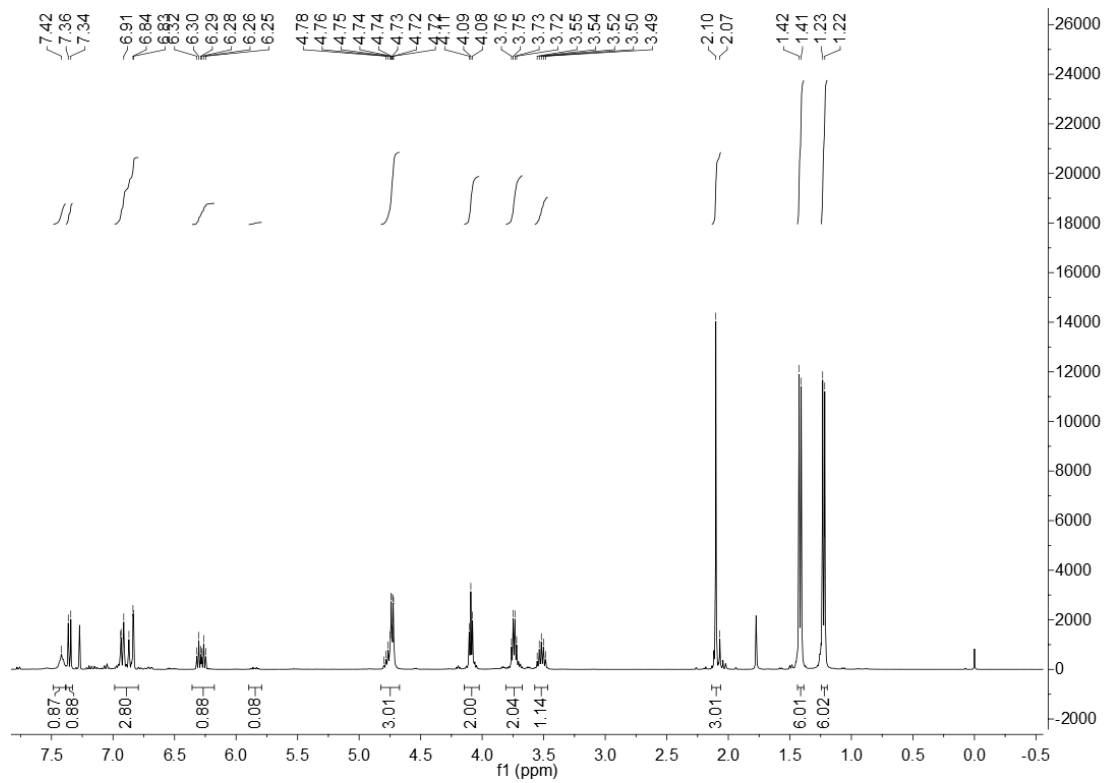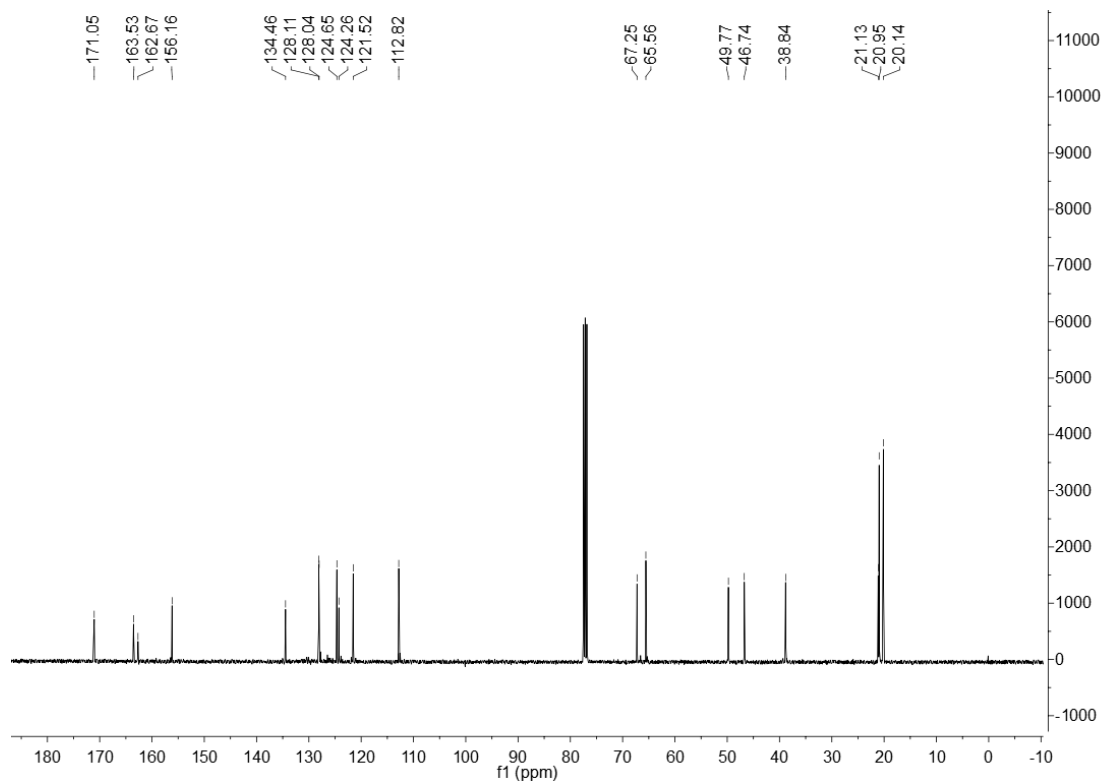

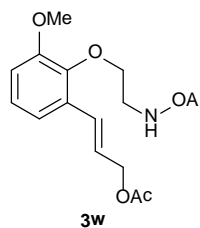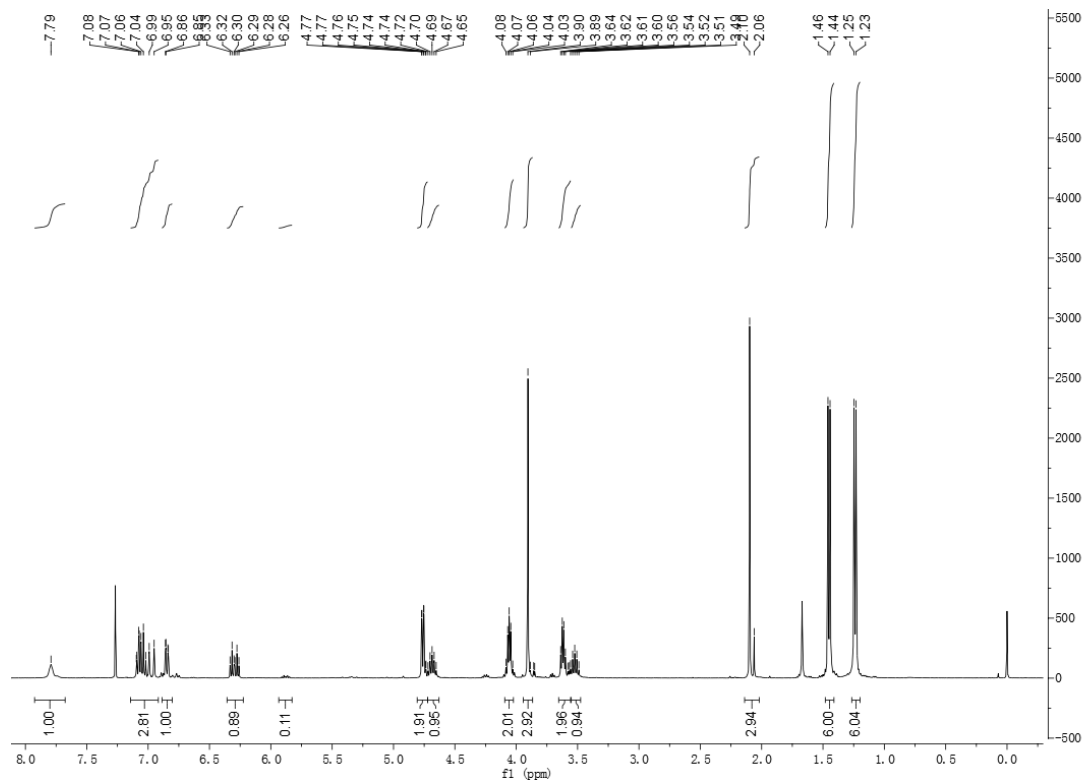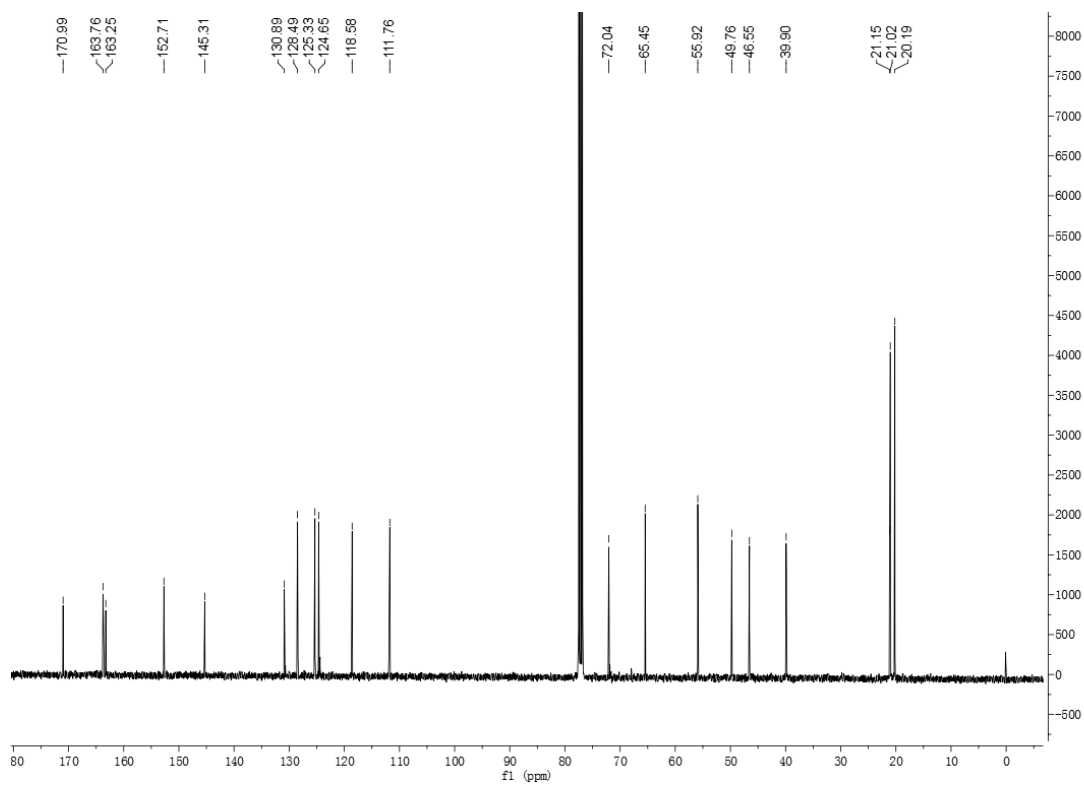



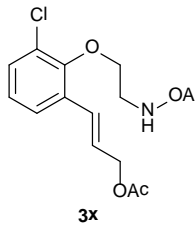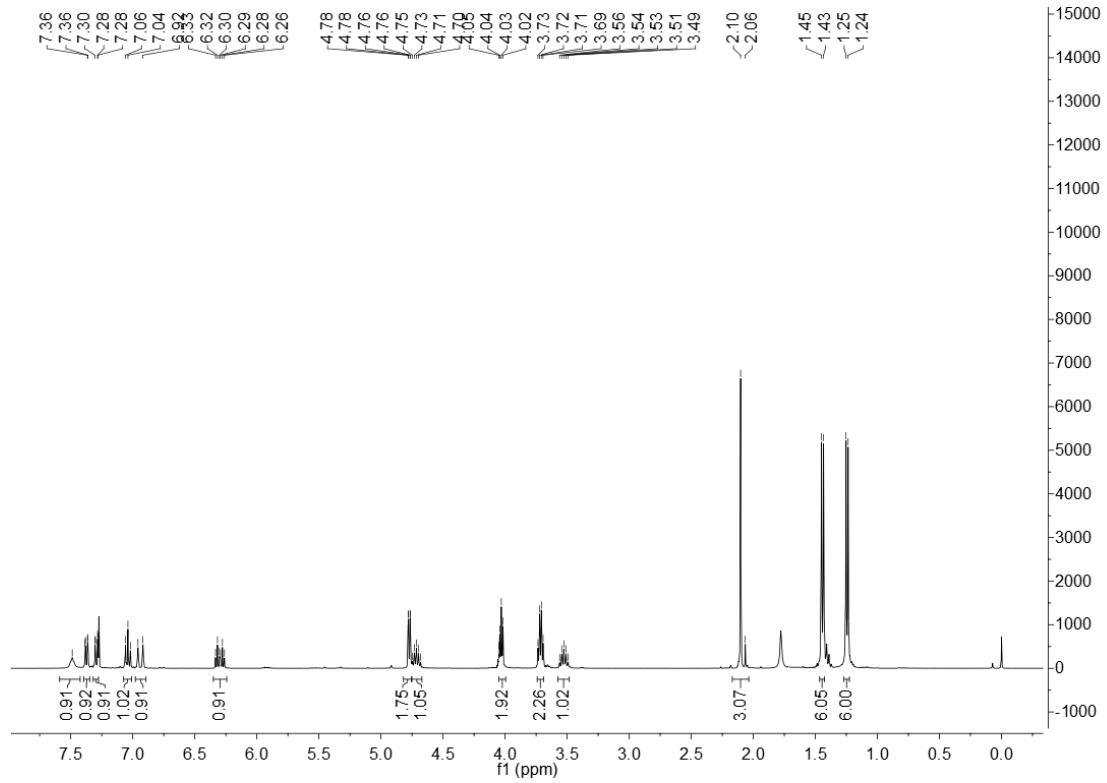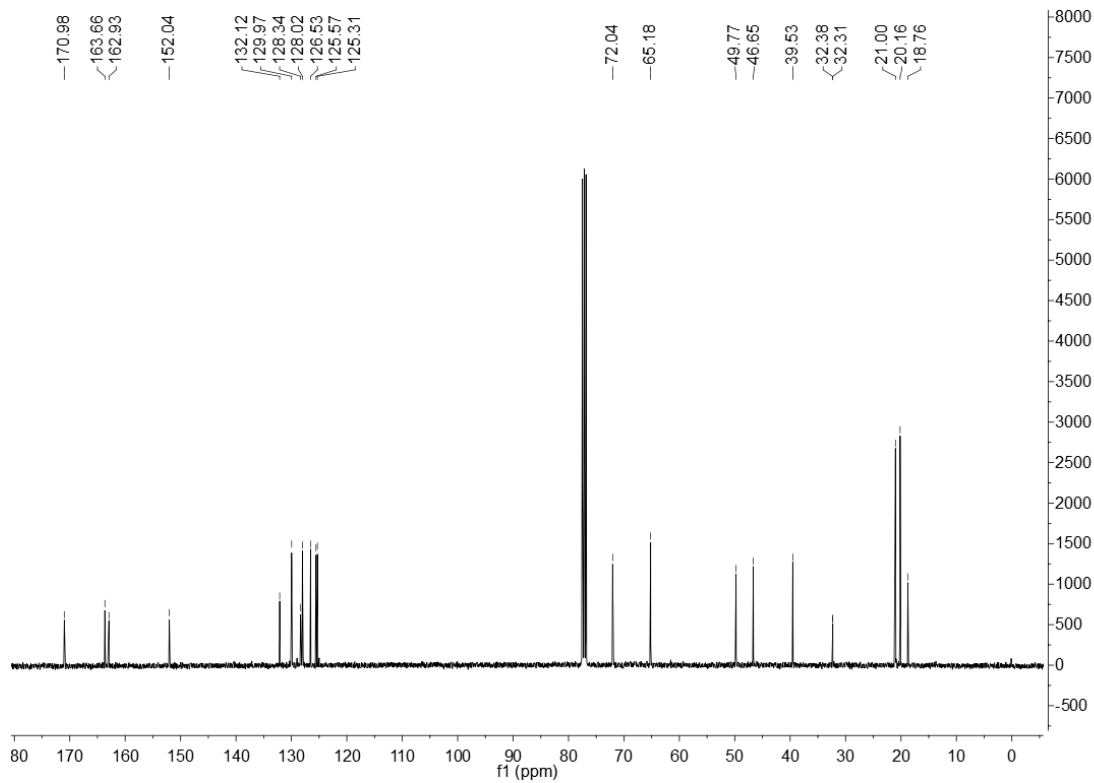

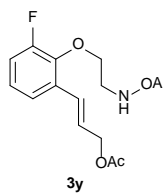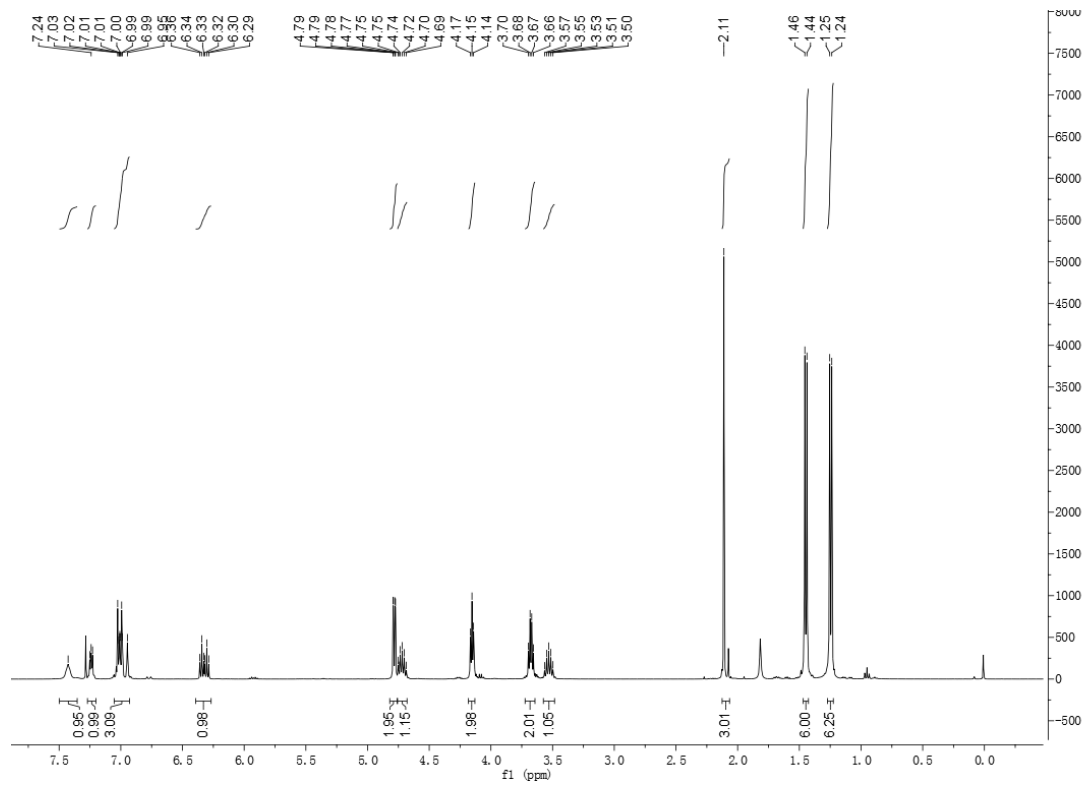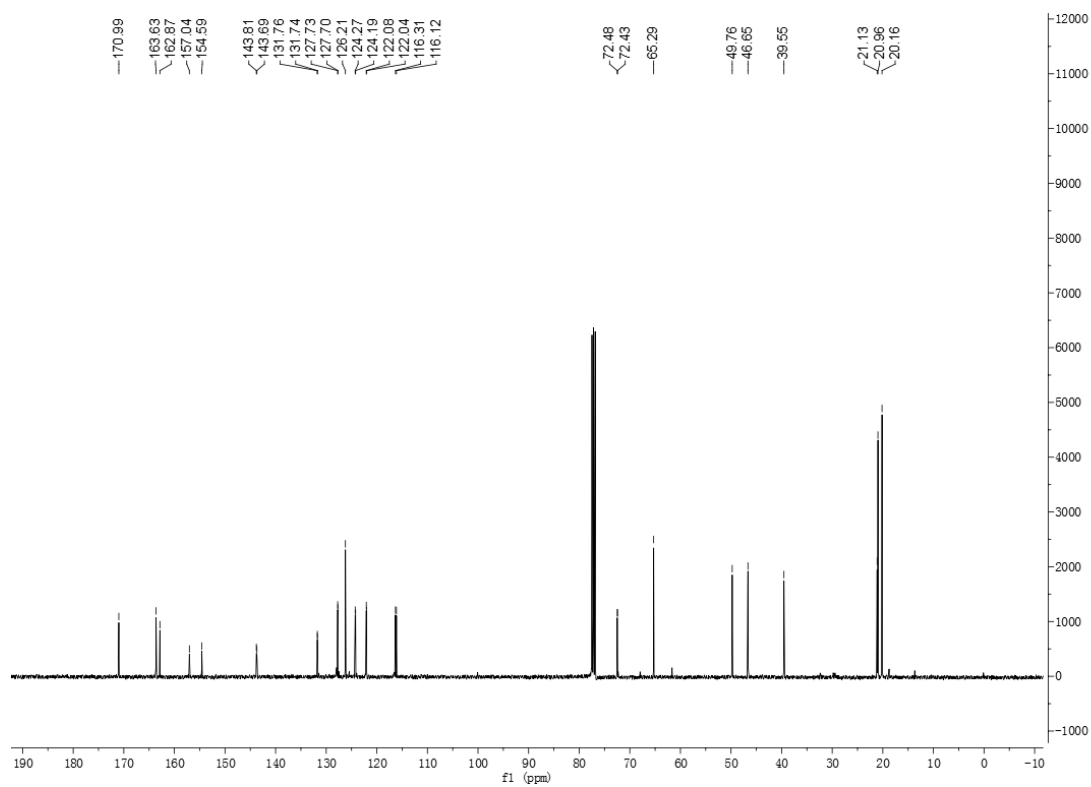

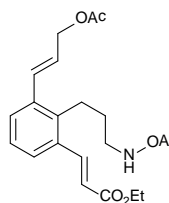

4a

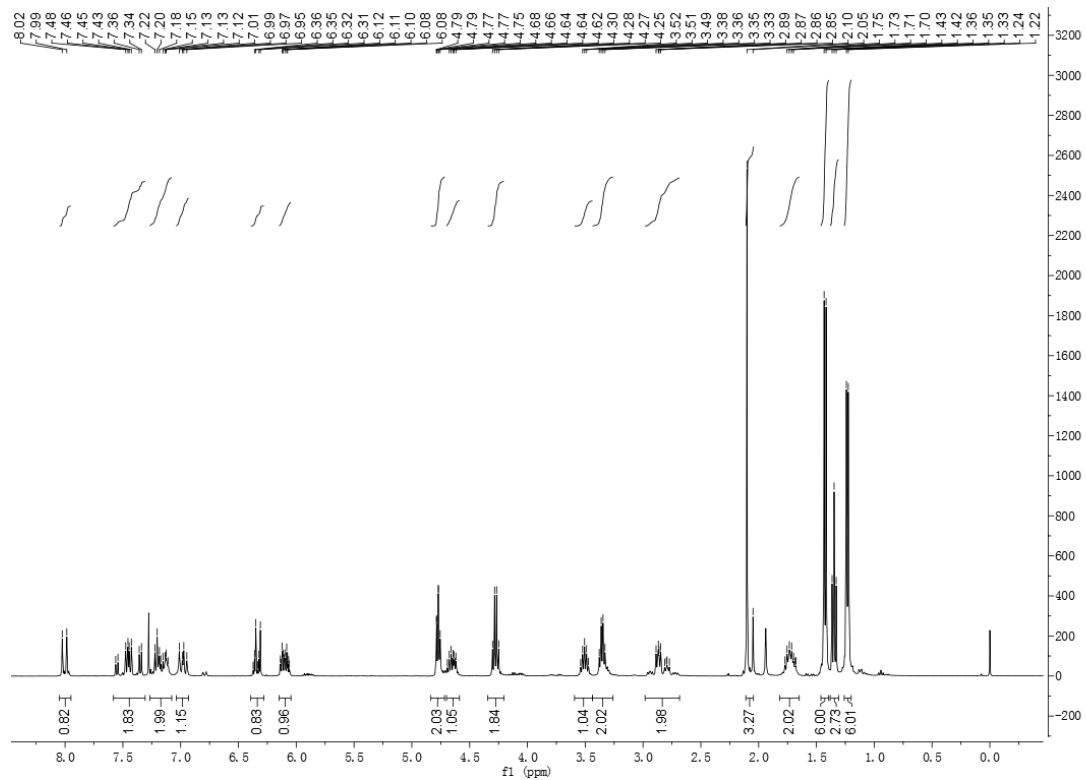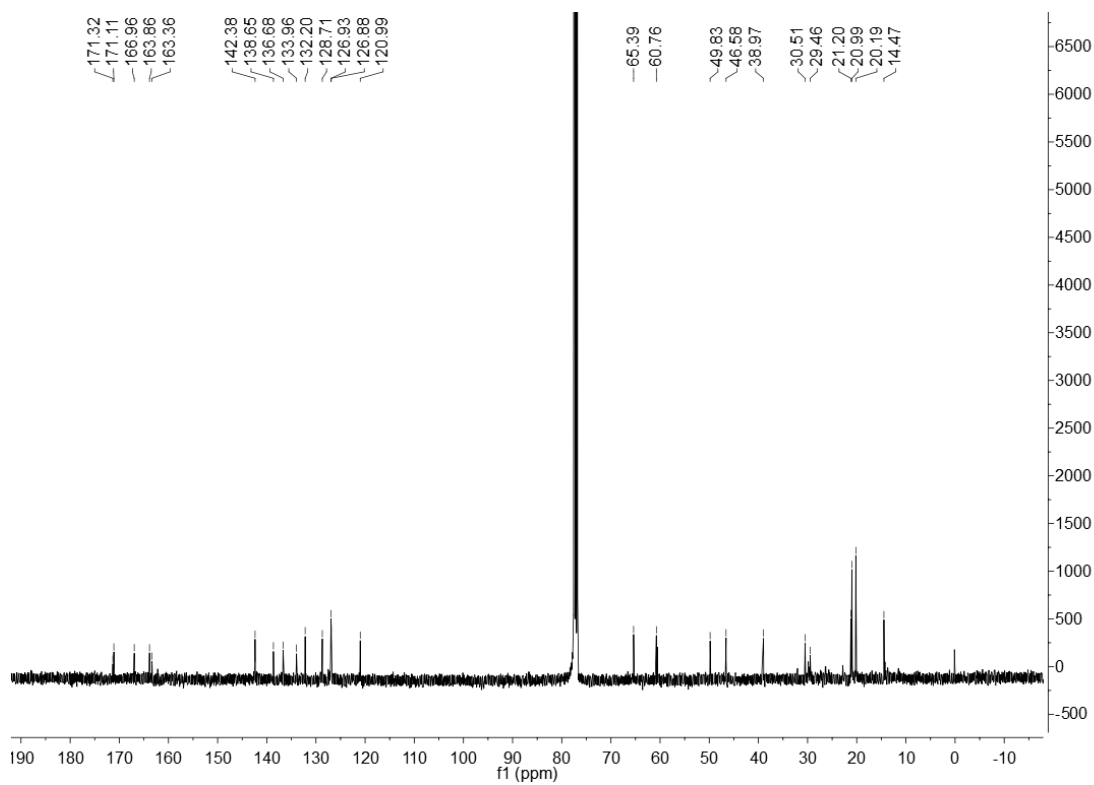

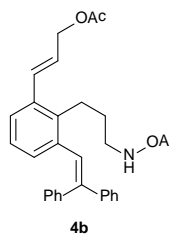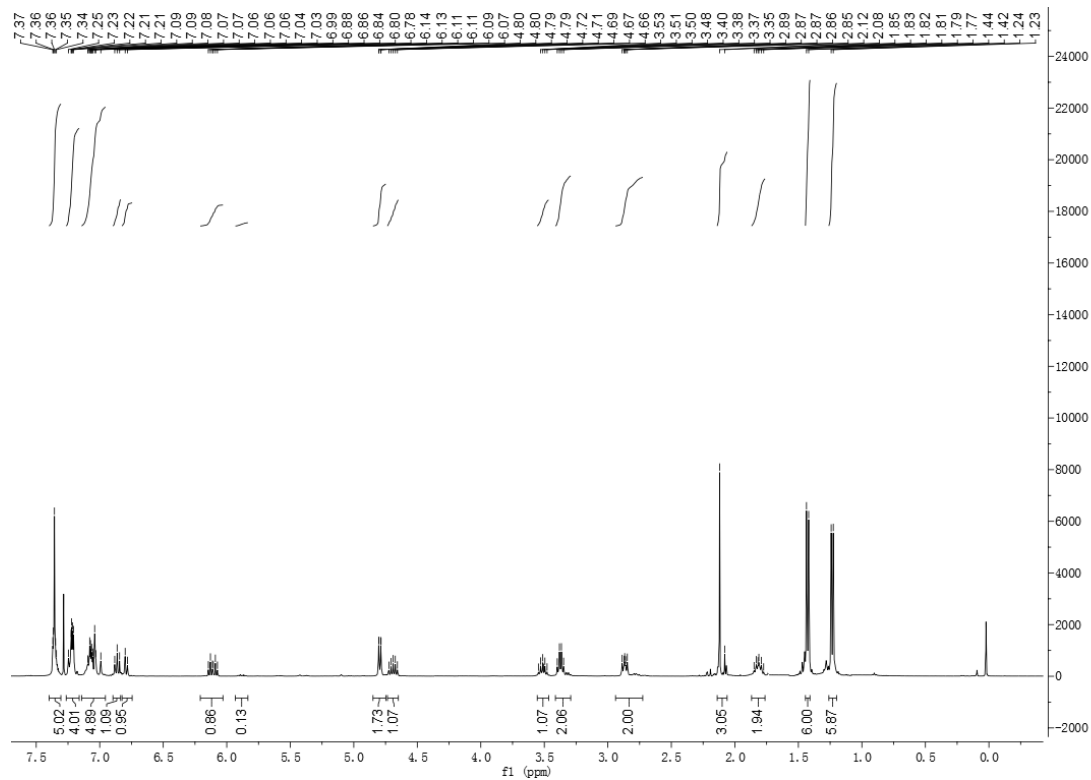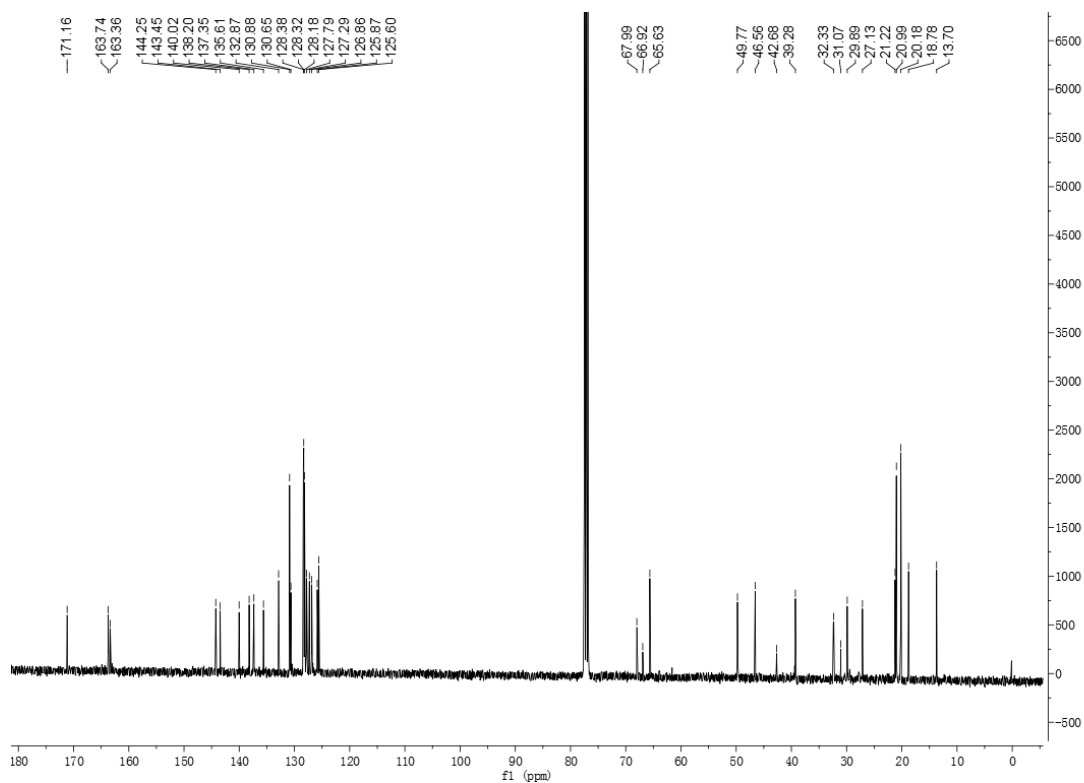

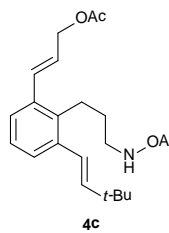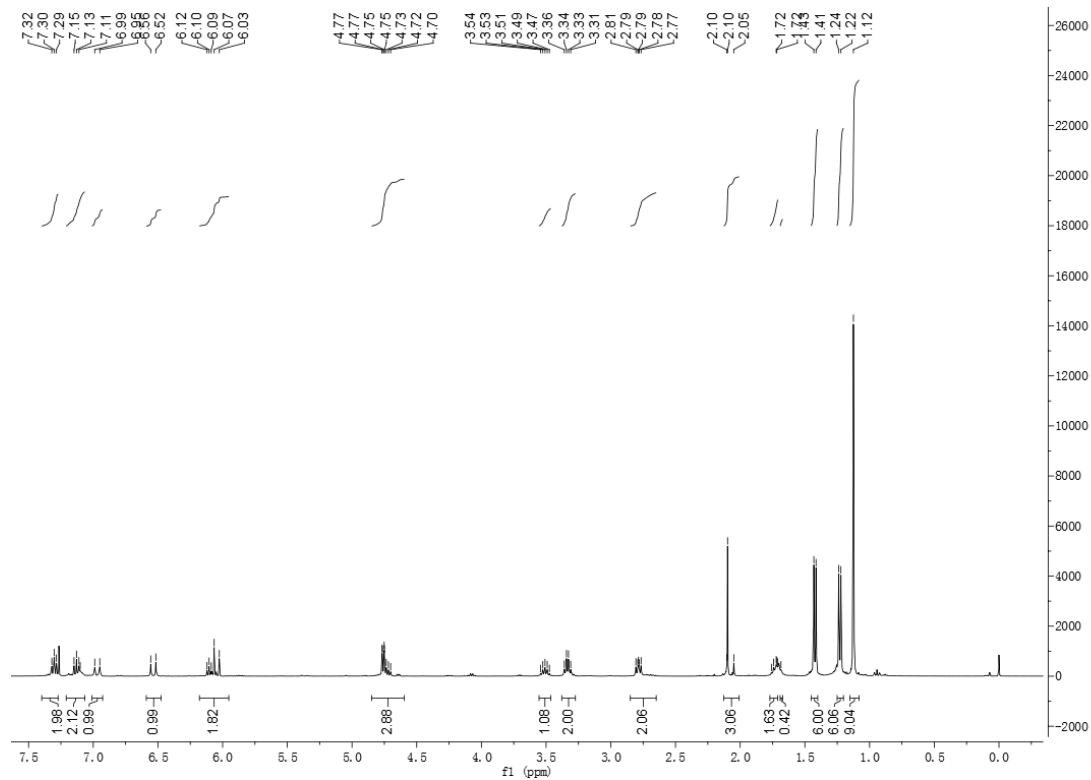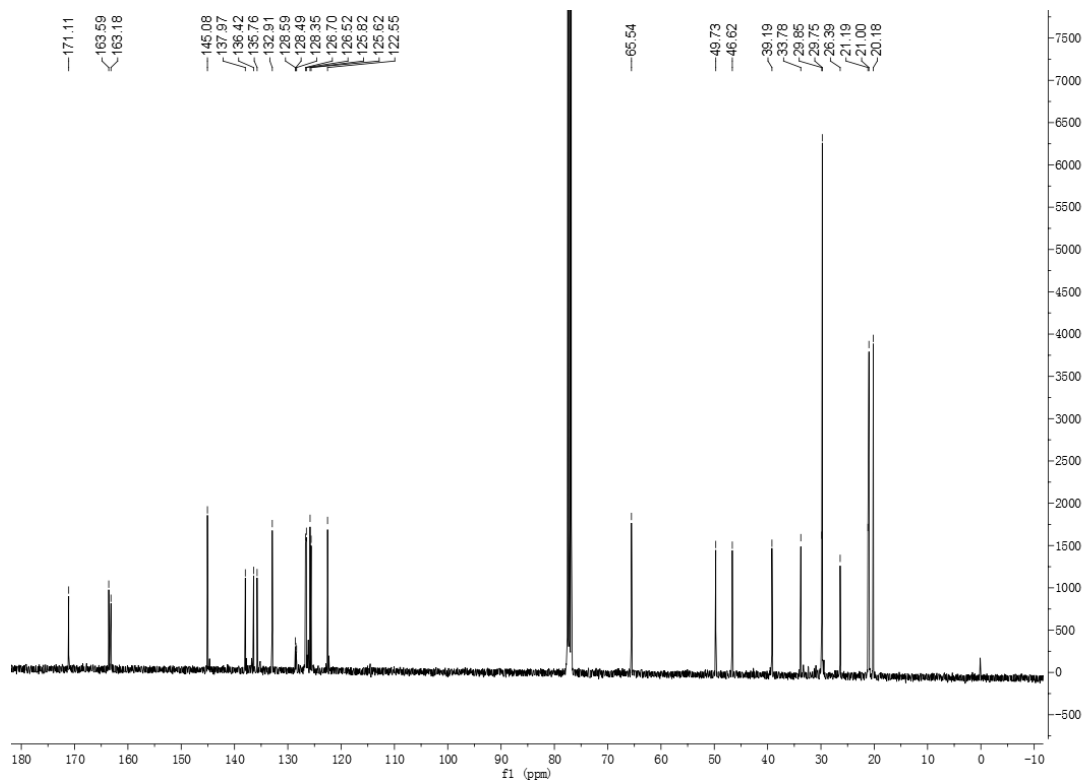

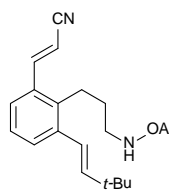

4d

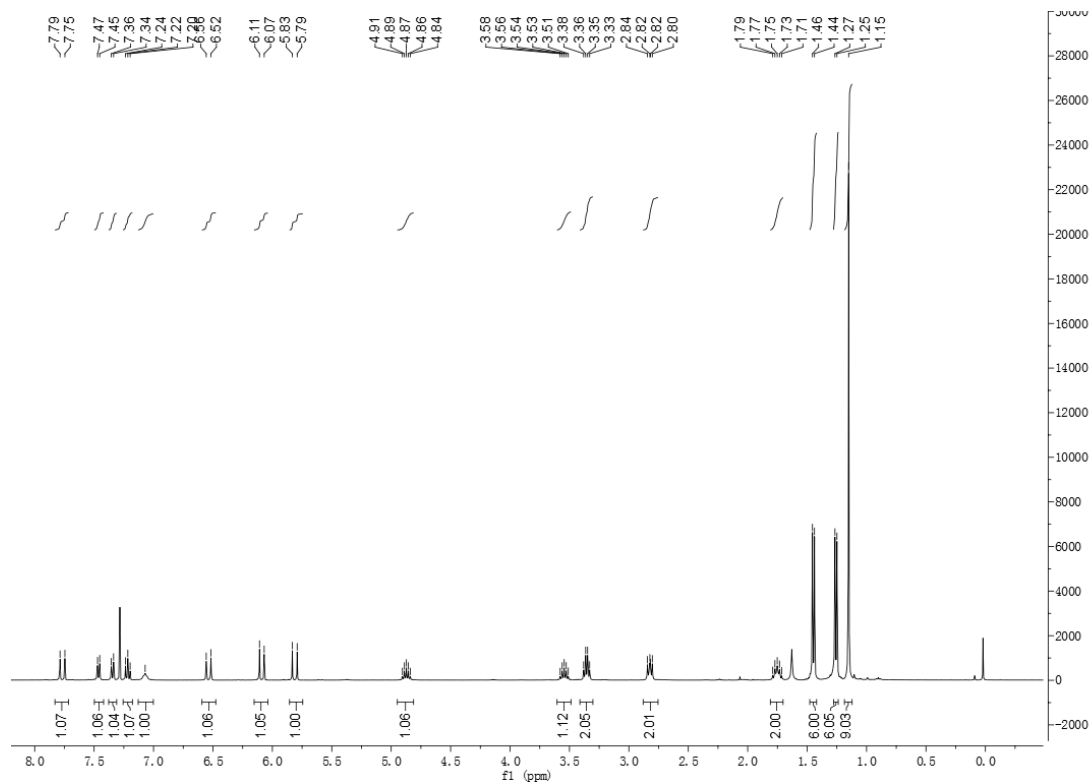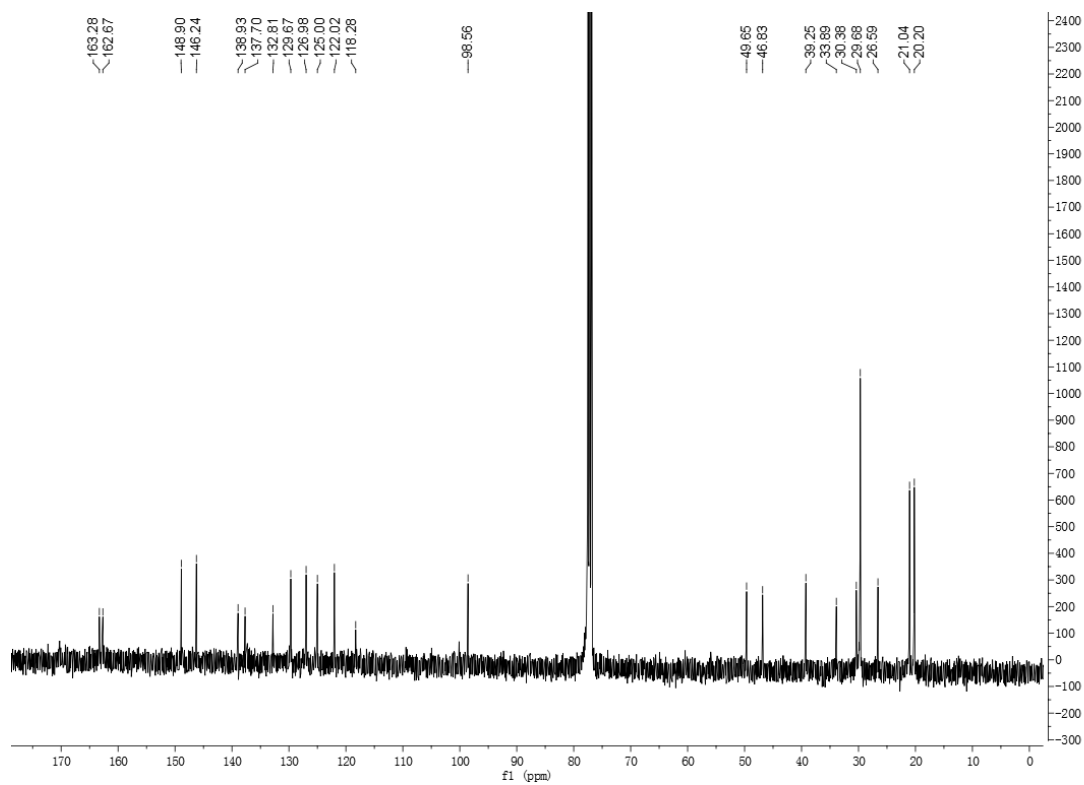

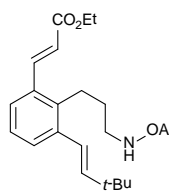

4e

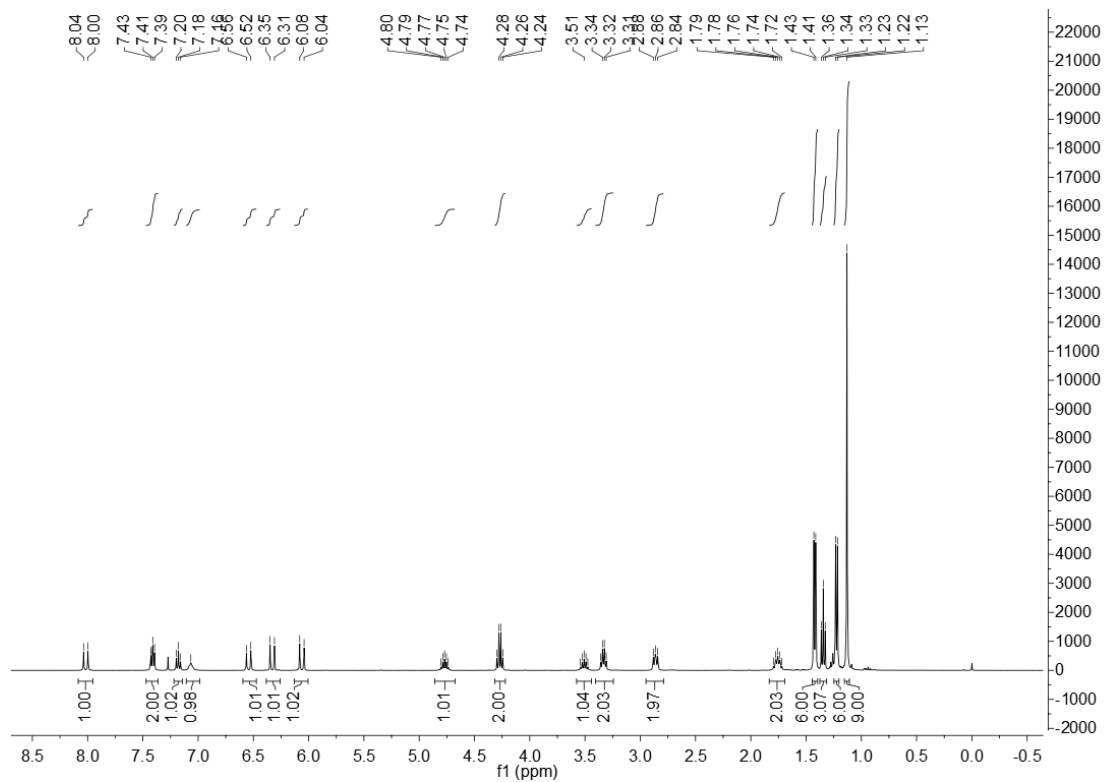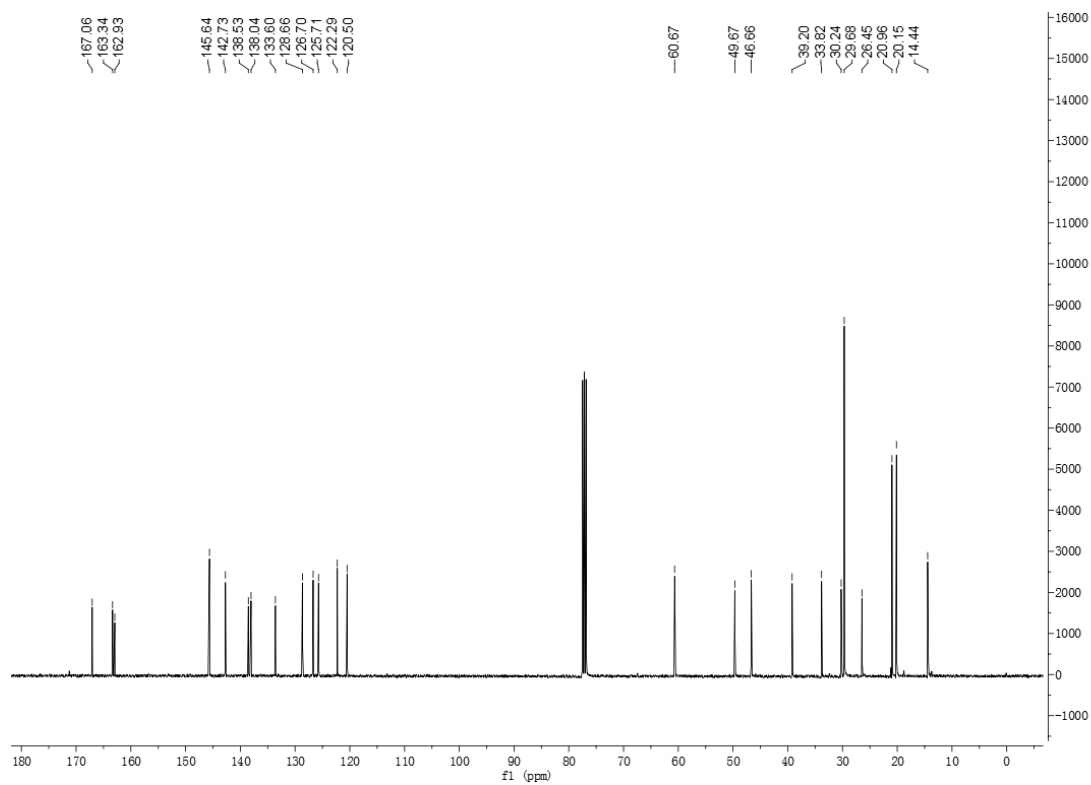

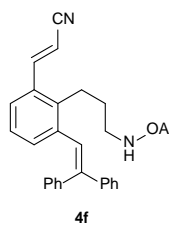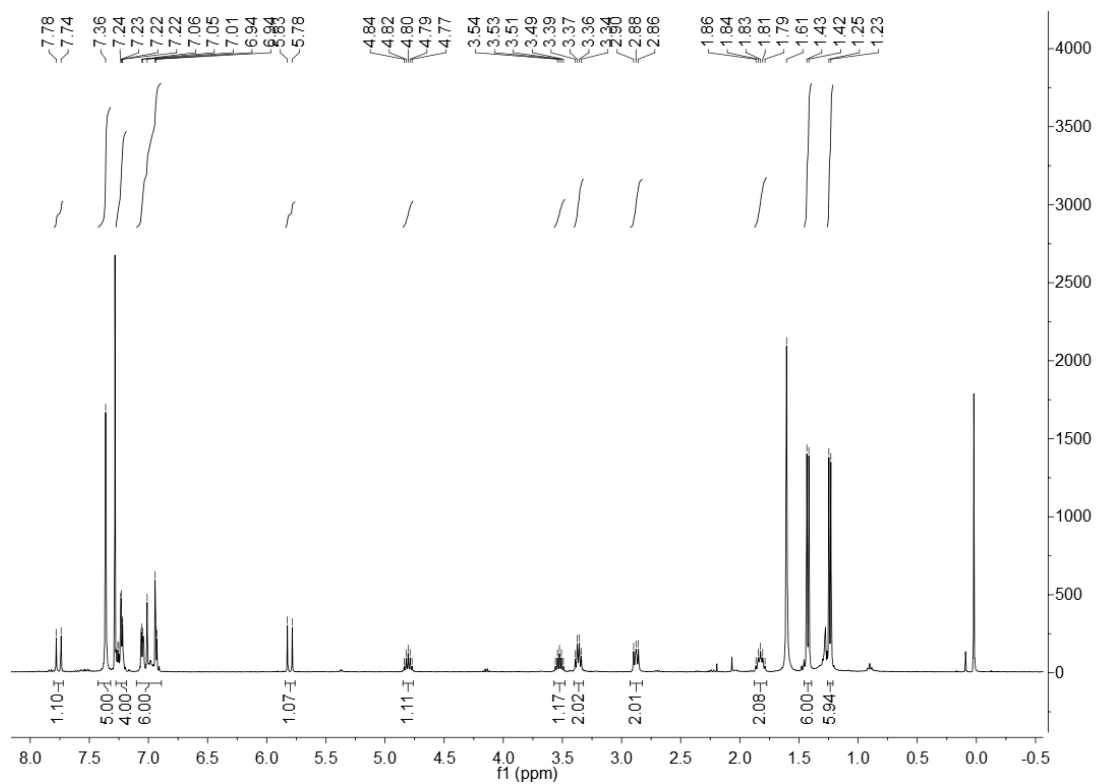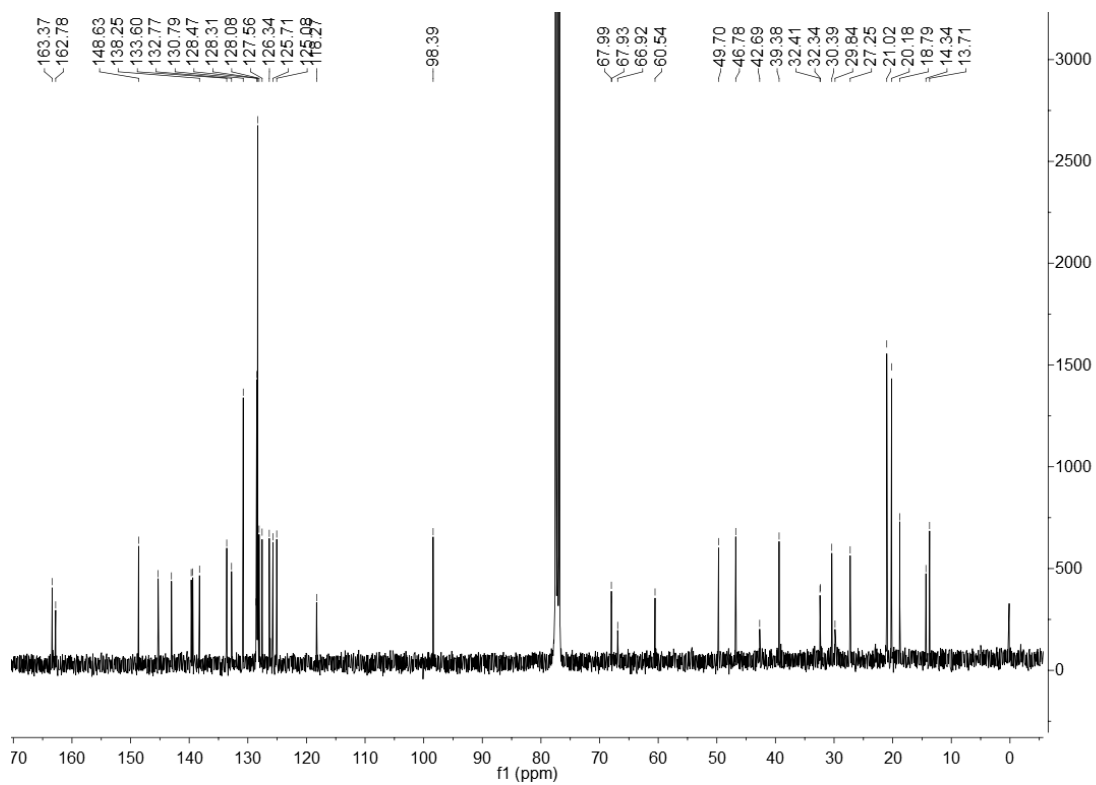



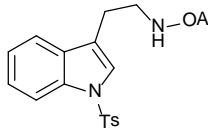

**5**

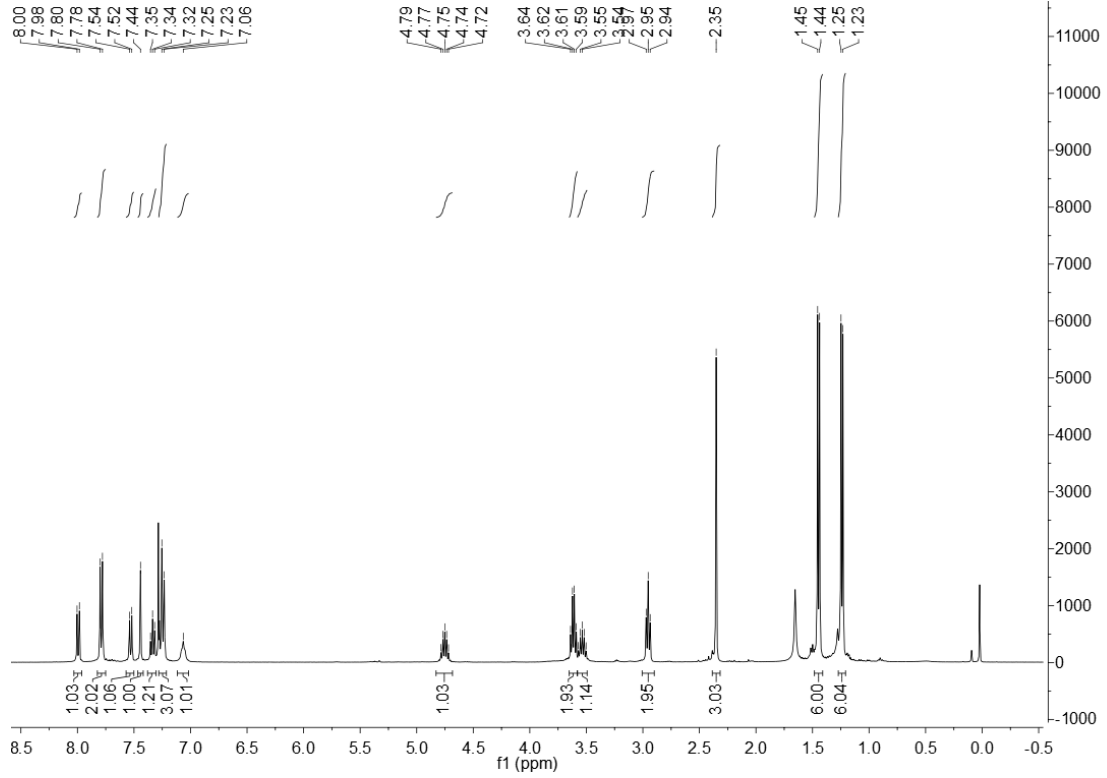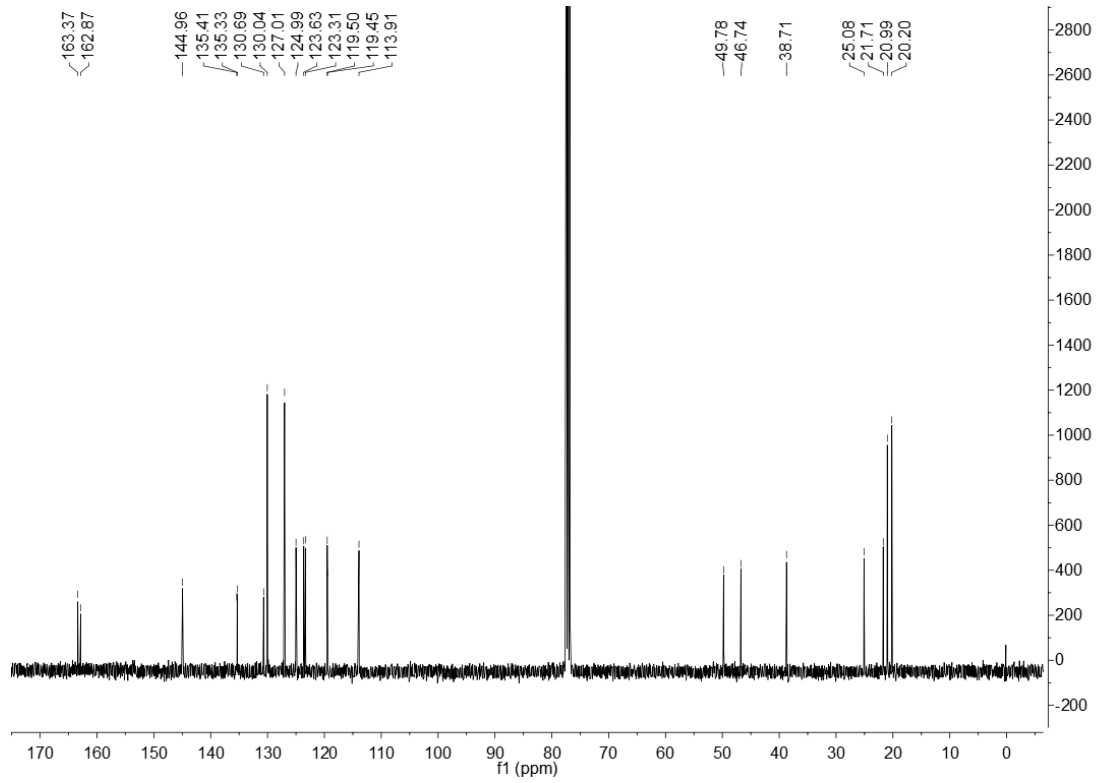

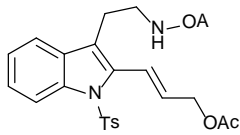

**6**

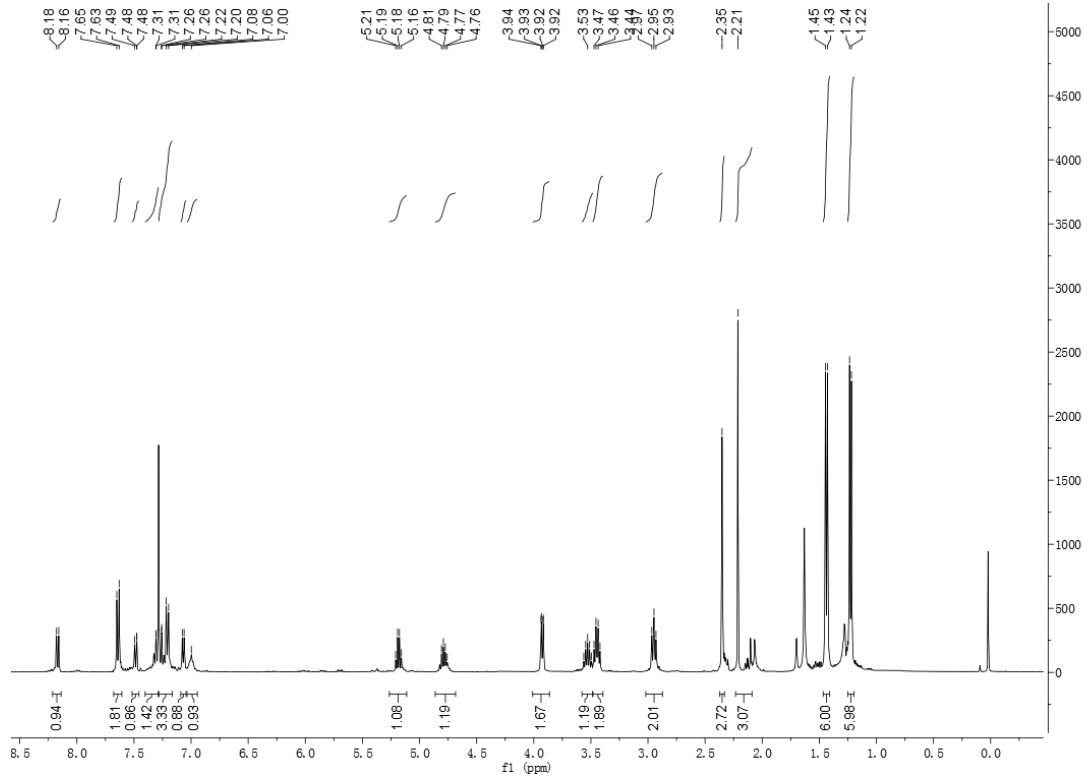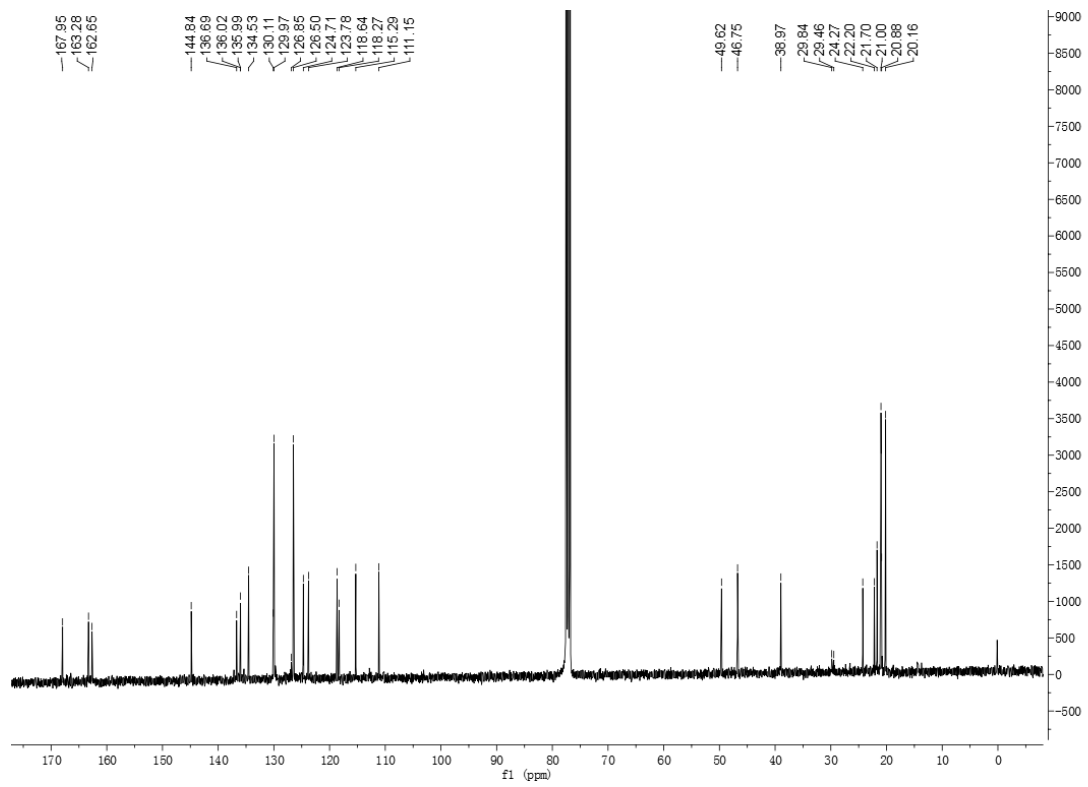

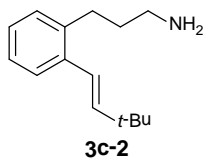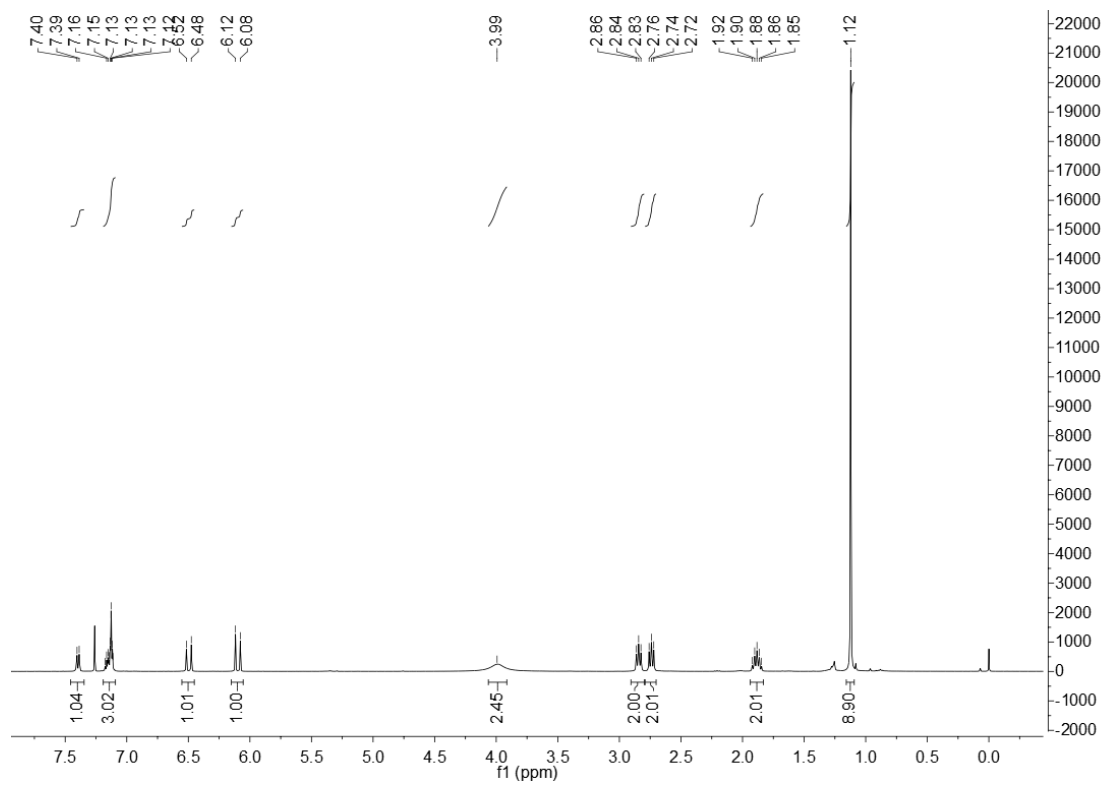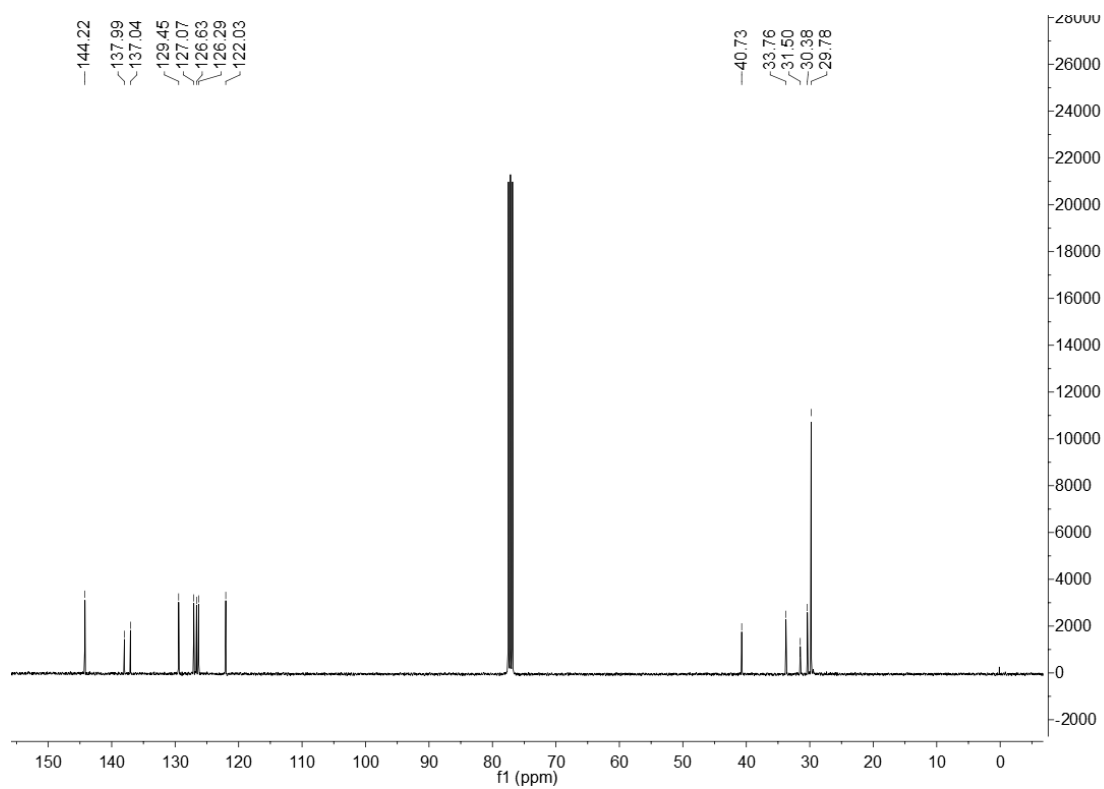

Supplement: c4sc02172j1.pdf [file c4sc02172j1.pdf]
